# Supplementary material for: Habitat suitability of cetaceans in the Gulf of Mexico using an ecological niche modeling approach
Source: PeerJ journal article supplement (doi:10.7717/peerj.10834), 2021-03-17

Supplemental Information S2. Maps of the sightings records for each species: total records and used records after the spatial filtering, and partitioned records for evaluation and training the models.

**Habitat suitability of cetaceans in the Gulf of Mexico using an ecological niche modeling approach.**

M. Rafael Ramírez-León<sup>1</sup>, María C. García-Aguilar<sup>2</sup>, Alfonsina E. Romo-Curiel<sup>2</sup>, Zurisaday Ramírez-Mendoza<sup>2</sup>, Arturo Fajardo-Yamamoto<sup>2</sup>, Oscar Sosa Nishizaki<sup>2</sup>

<sup>1</sup>Posgrado en Ecología Marina, Centro de Investigación Científica y de Educación Superior de Ensenada, Baja California (CICESE), Carretera Ensenada-Tijuana N° 3918, Ensenada, Baja California, 22860, Mexico.

<sup>2</sup>Departamento de Oceanología Biológica, CICESE, Carretera Ensenada-Tijuana N° 3918, Ensenada, Baja California, 22860, Mexico.

Corresponding Author:

María C. García-Aguilar

Carretera Ensenada-Tijuana N° 3918, Ensenada, Baja California, 22860, Mexico.

Email address: [gaguilar@cicese.mx](mailto:gaguilar@cicese.mx)

**Figure S1.** (A) Total records found and used records after the spatial filtering for the sperm whale. (B) Partitioned records for evaluation and training the models.

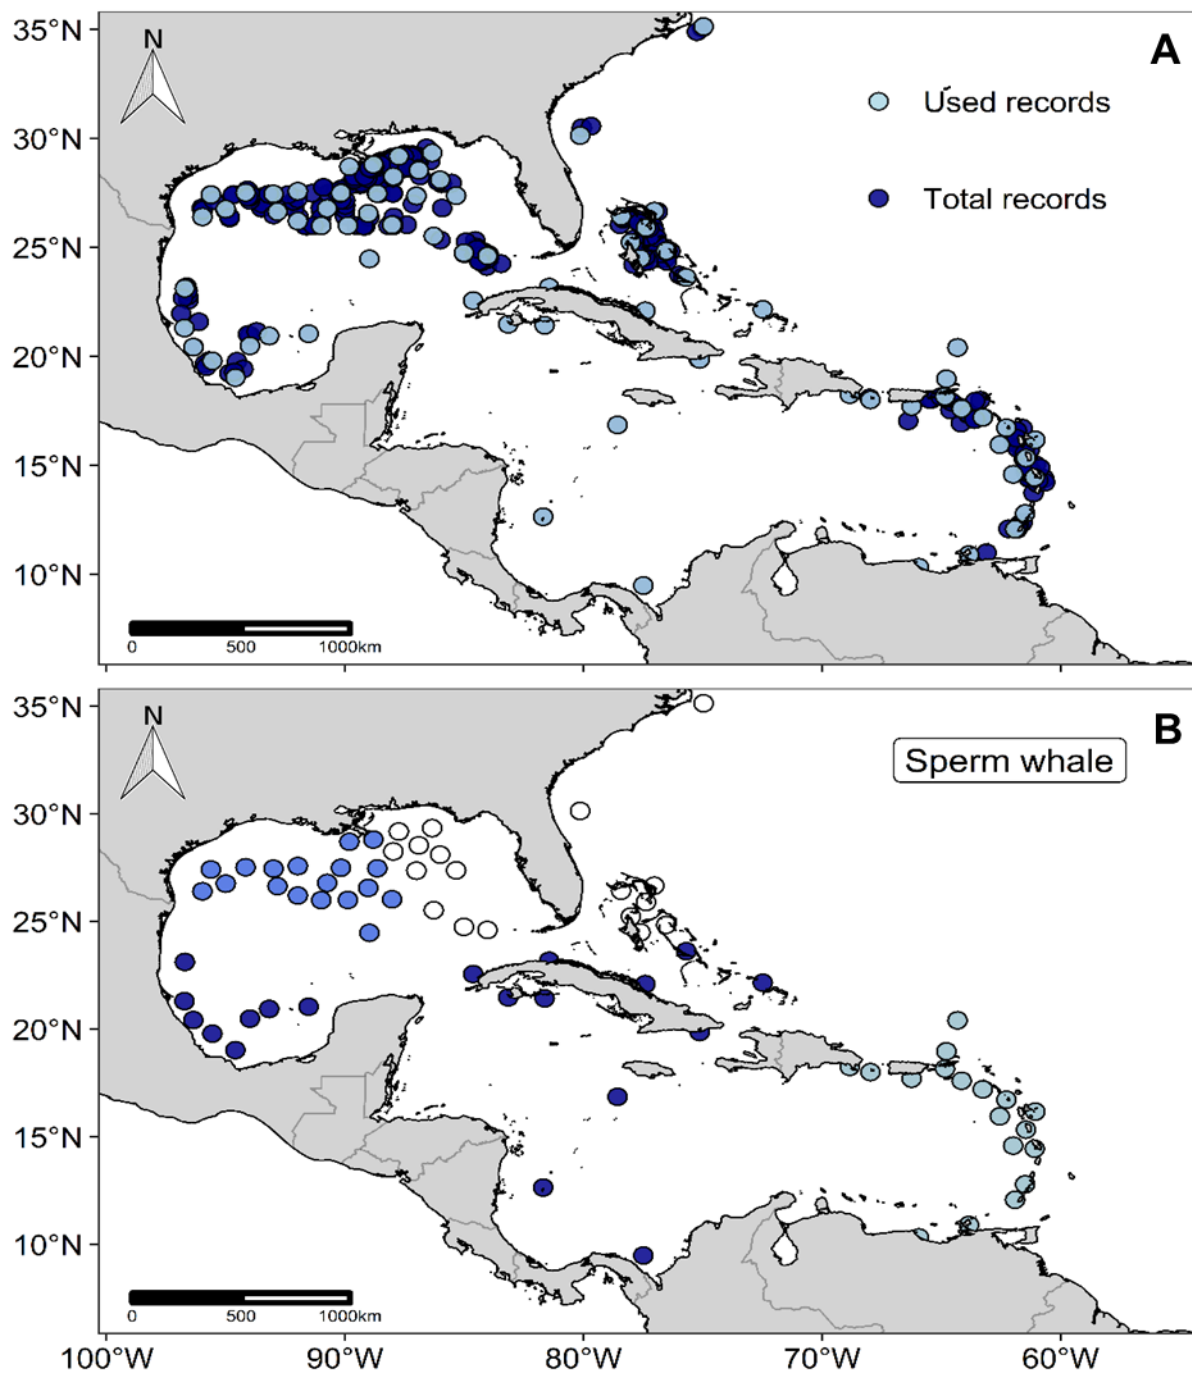

**Figure S2.** (A) Total records found and used records after the spatial filtering for the dwarf sperm whale. (B) Partitioned records for evaluation and training the models.

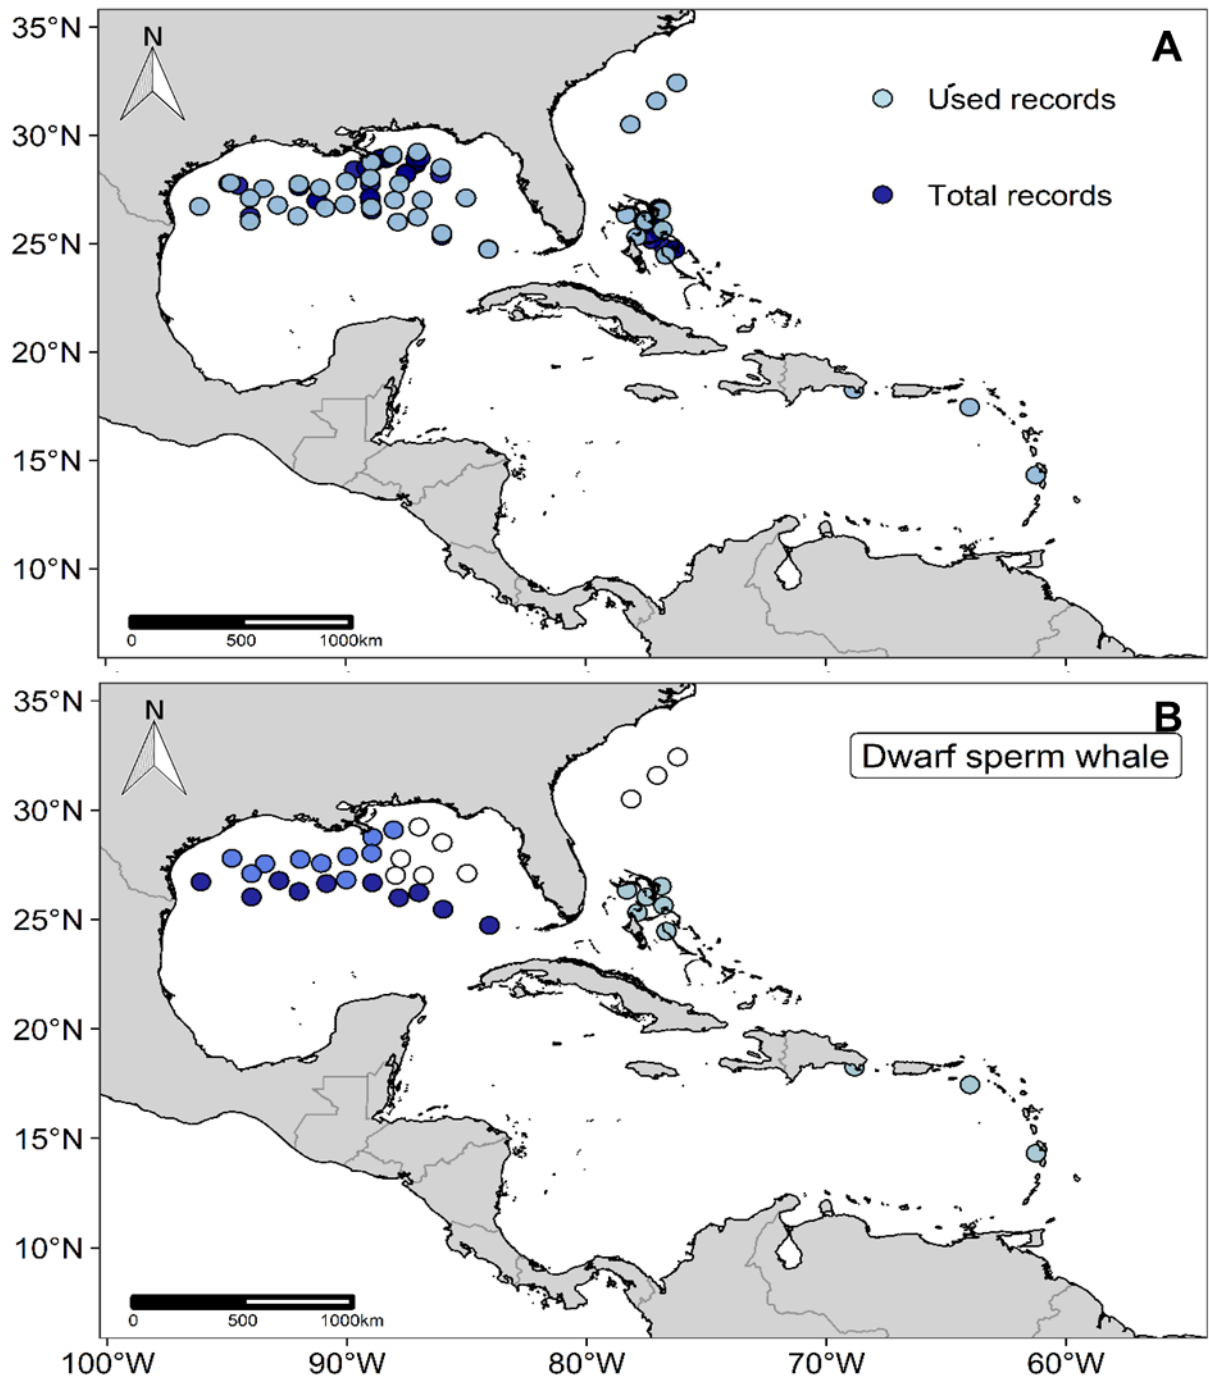

**Figure S3.** (A) Total records found and used records after the spatial filtering for the Cuvier's beaked whale. (B) Partitioned records for evaluation and training the models.

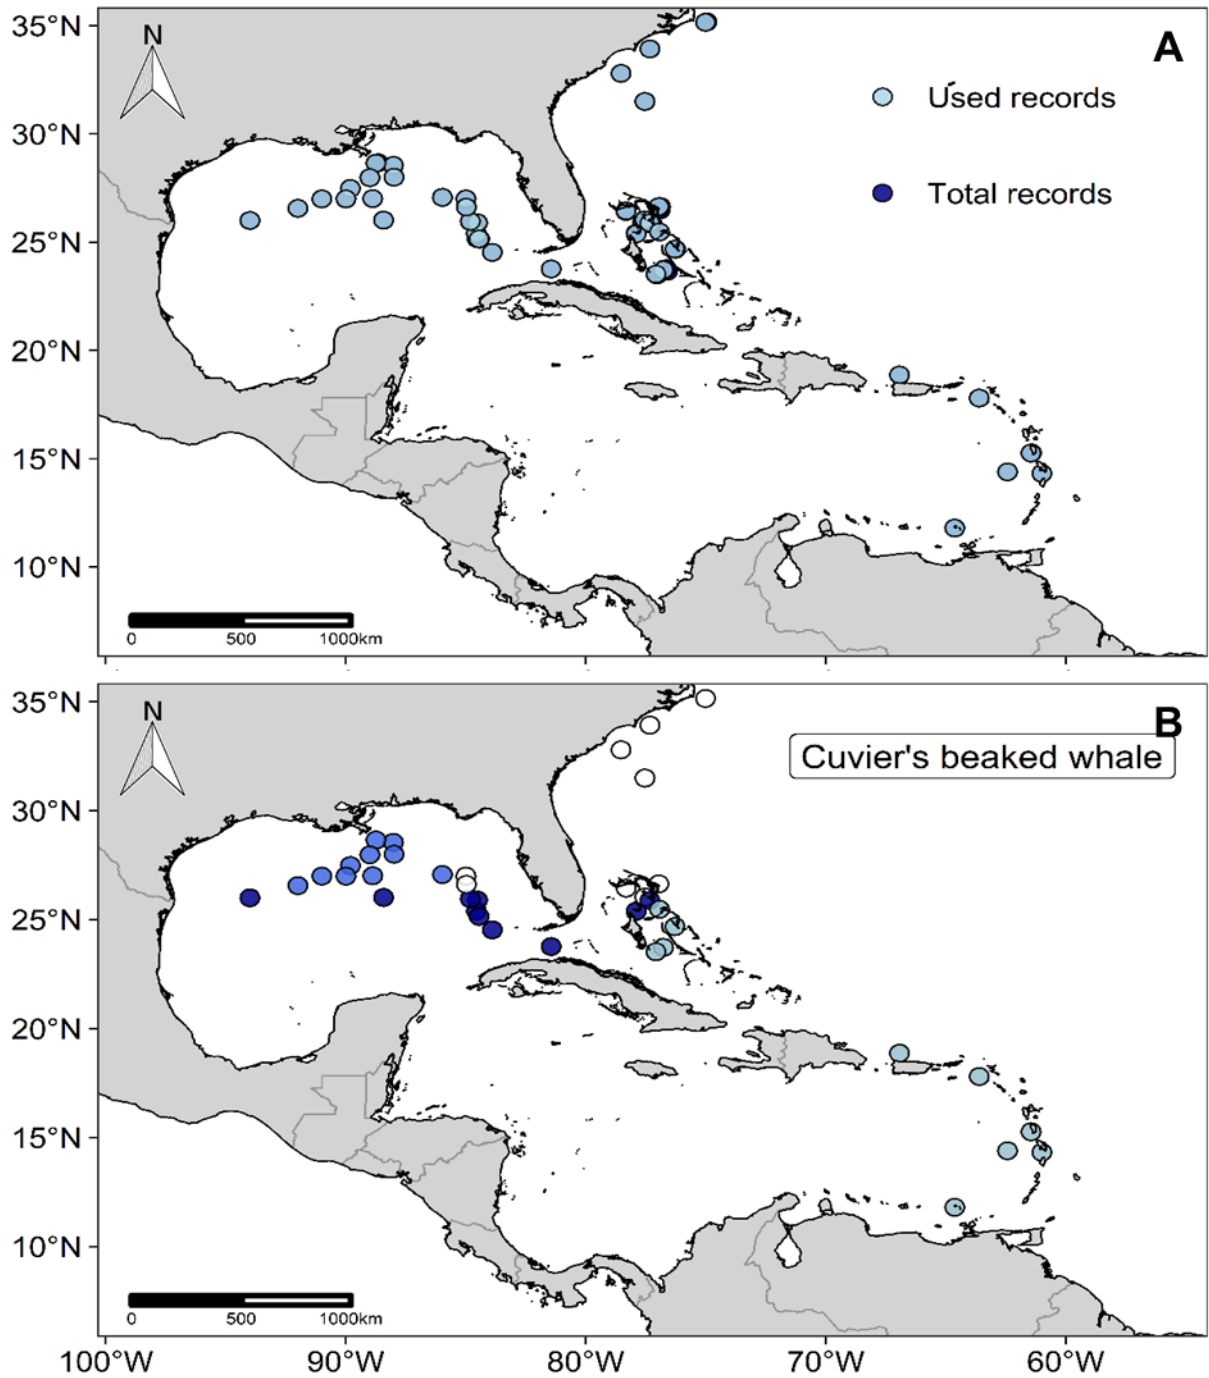

**Figure S4.** (A) Total records found and used records after the spatial filtering for the short-finned pilot whale. (B) Partitioned records for evaluation and training the models.

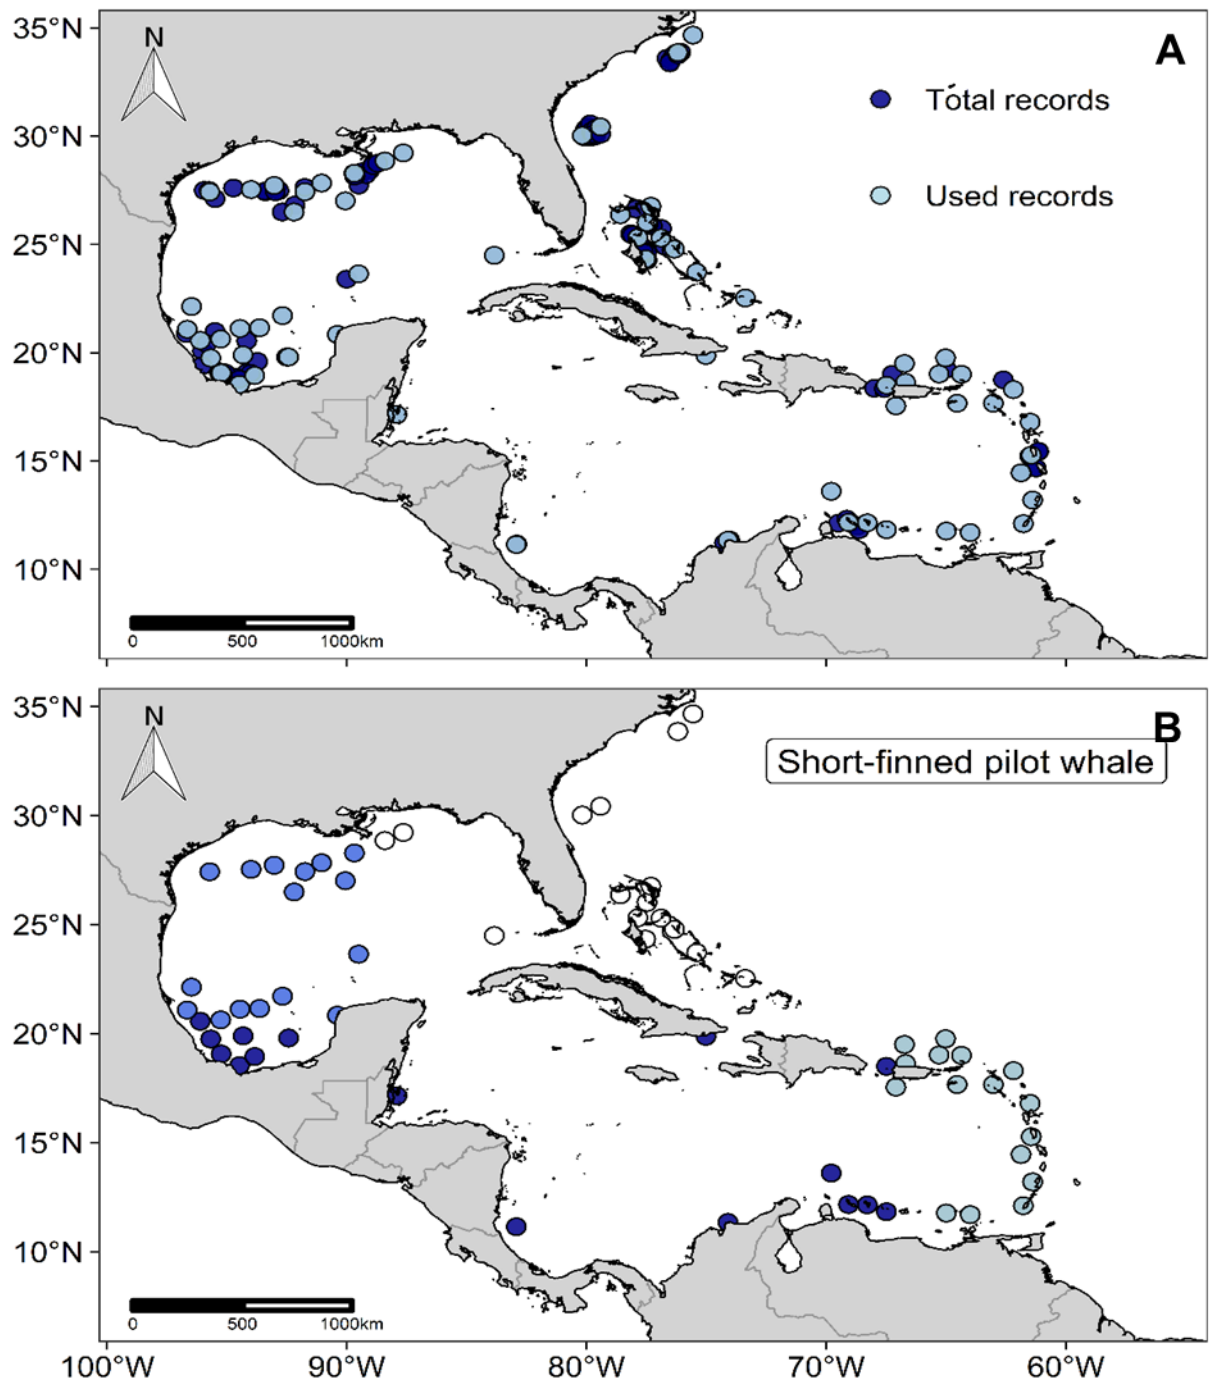

**Figure S5.** (A) Total records found and used records after the spatial filtering for the rough-toothed dolphin. (B) Partitioned records for evaluation and training the models.

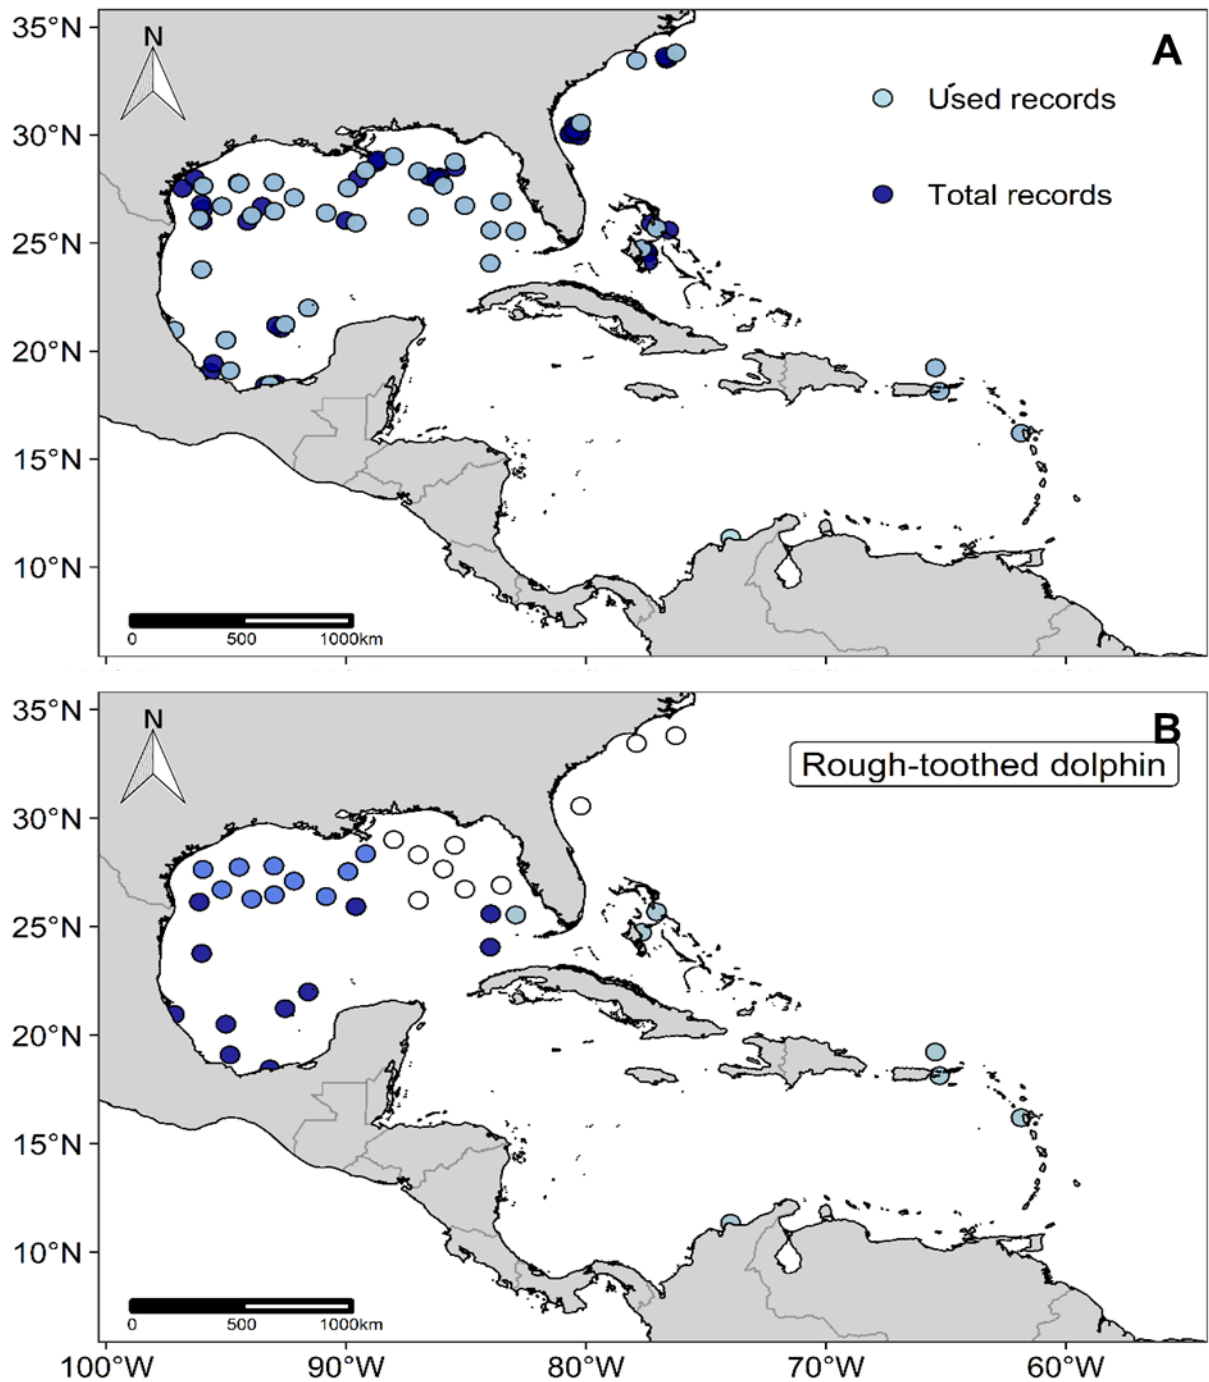

**Figure S6.** (A) Total sightings found and used sightings after the spatial filtering for the Risso's dolphin. (B) Partitioned records for evaluation and training the models.

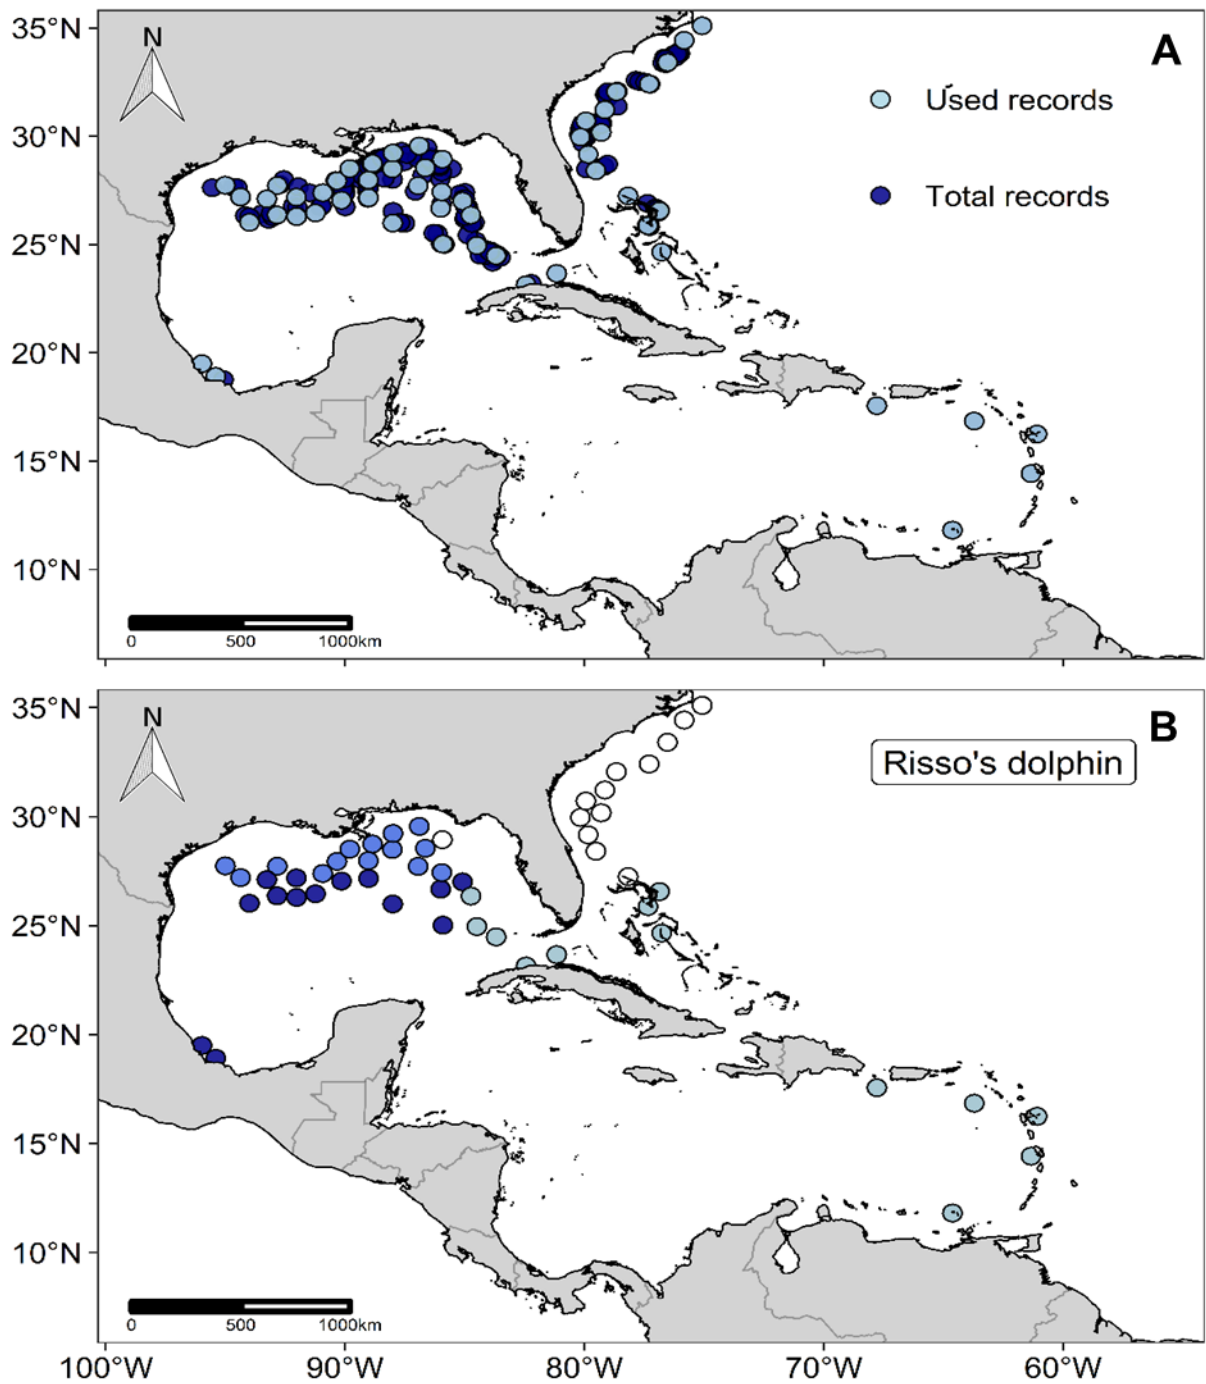



**Figure S7.** (A) Total records found and used records after the spatial filtering for the Atlantic spotted dolphin. (B) Partitioned records for evaluation and training the models.

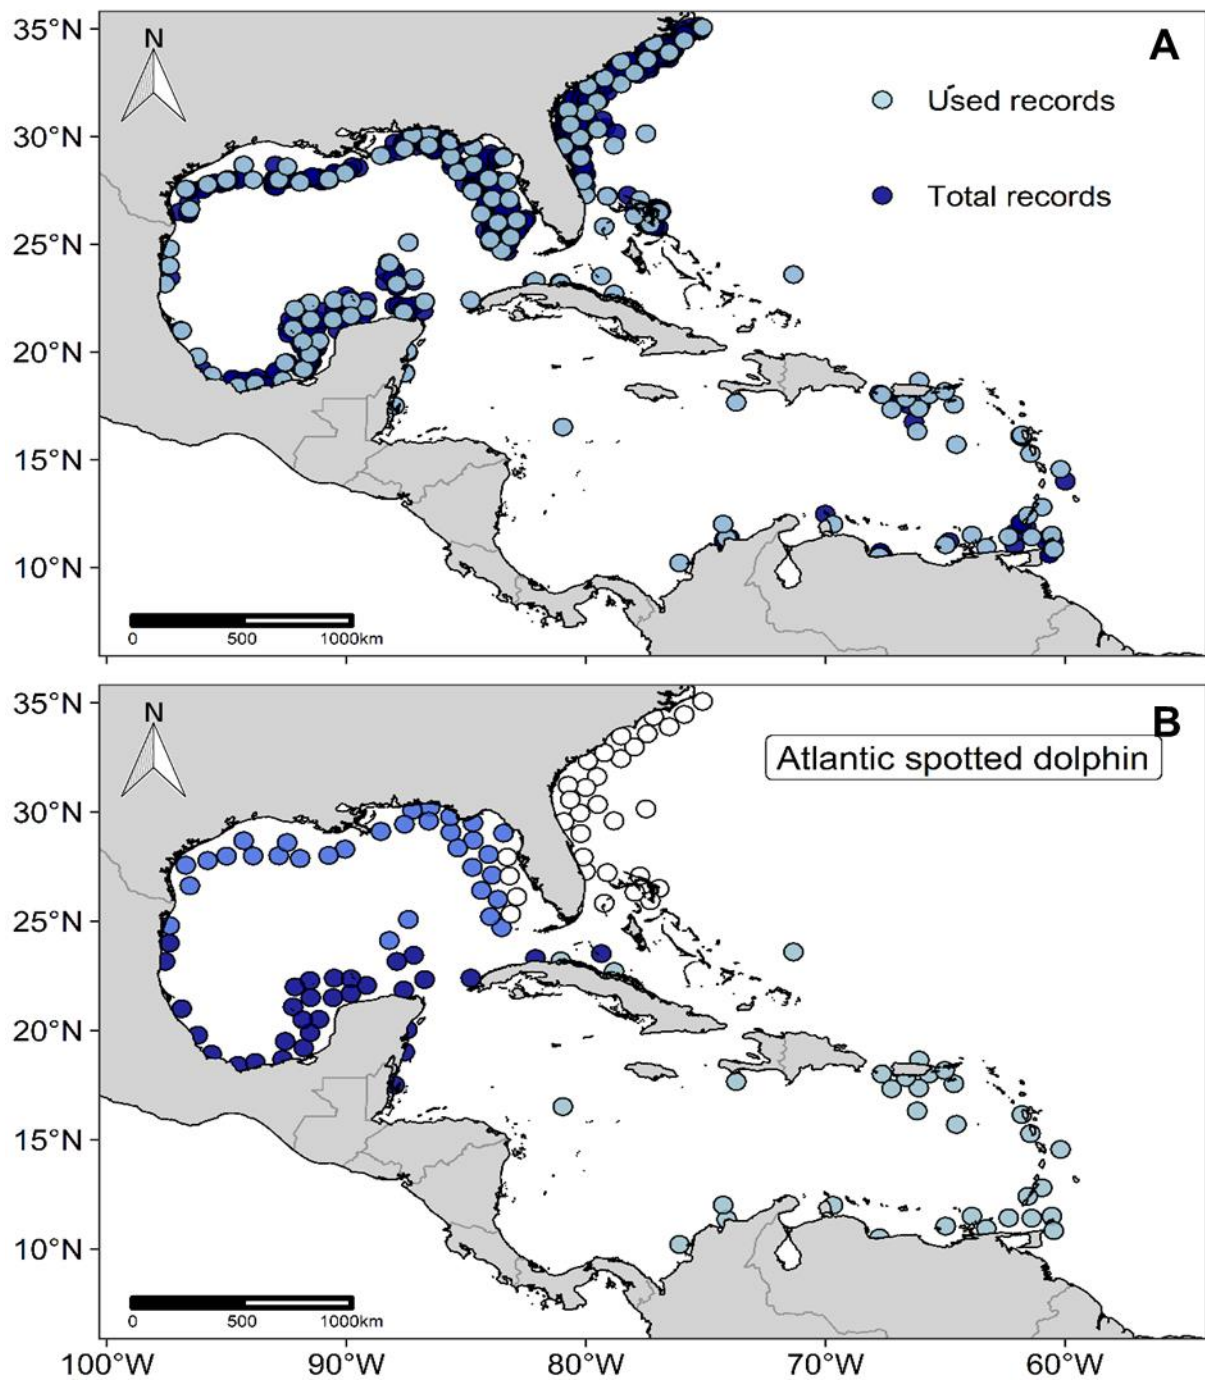



**Figure S8.** (A) Total records found and used records after the spatial filtering for the pantropical spotted dolphin. (B) Partitioned records for evaluation and training the models.

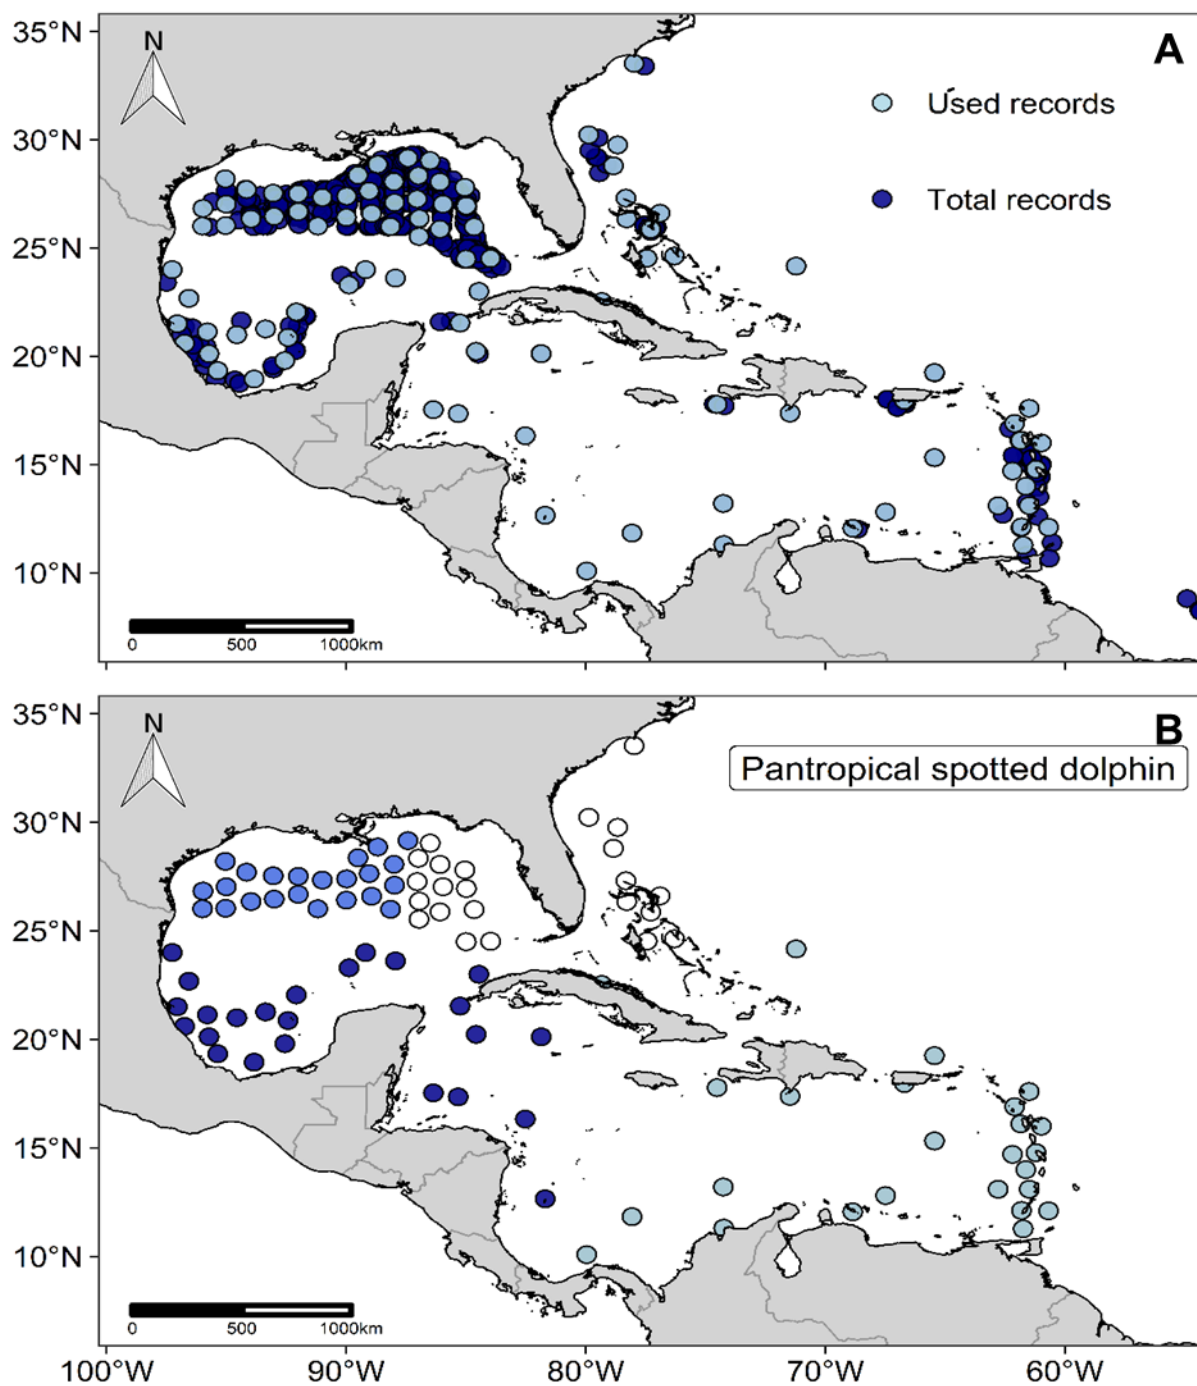

**Figure S9.** (A) Total records found and used records after the spatial filtering for the striped dolphin. (B) Partitioned records for evaluation and training the models.

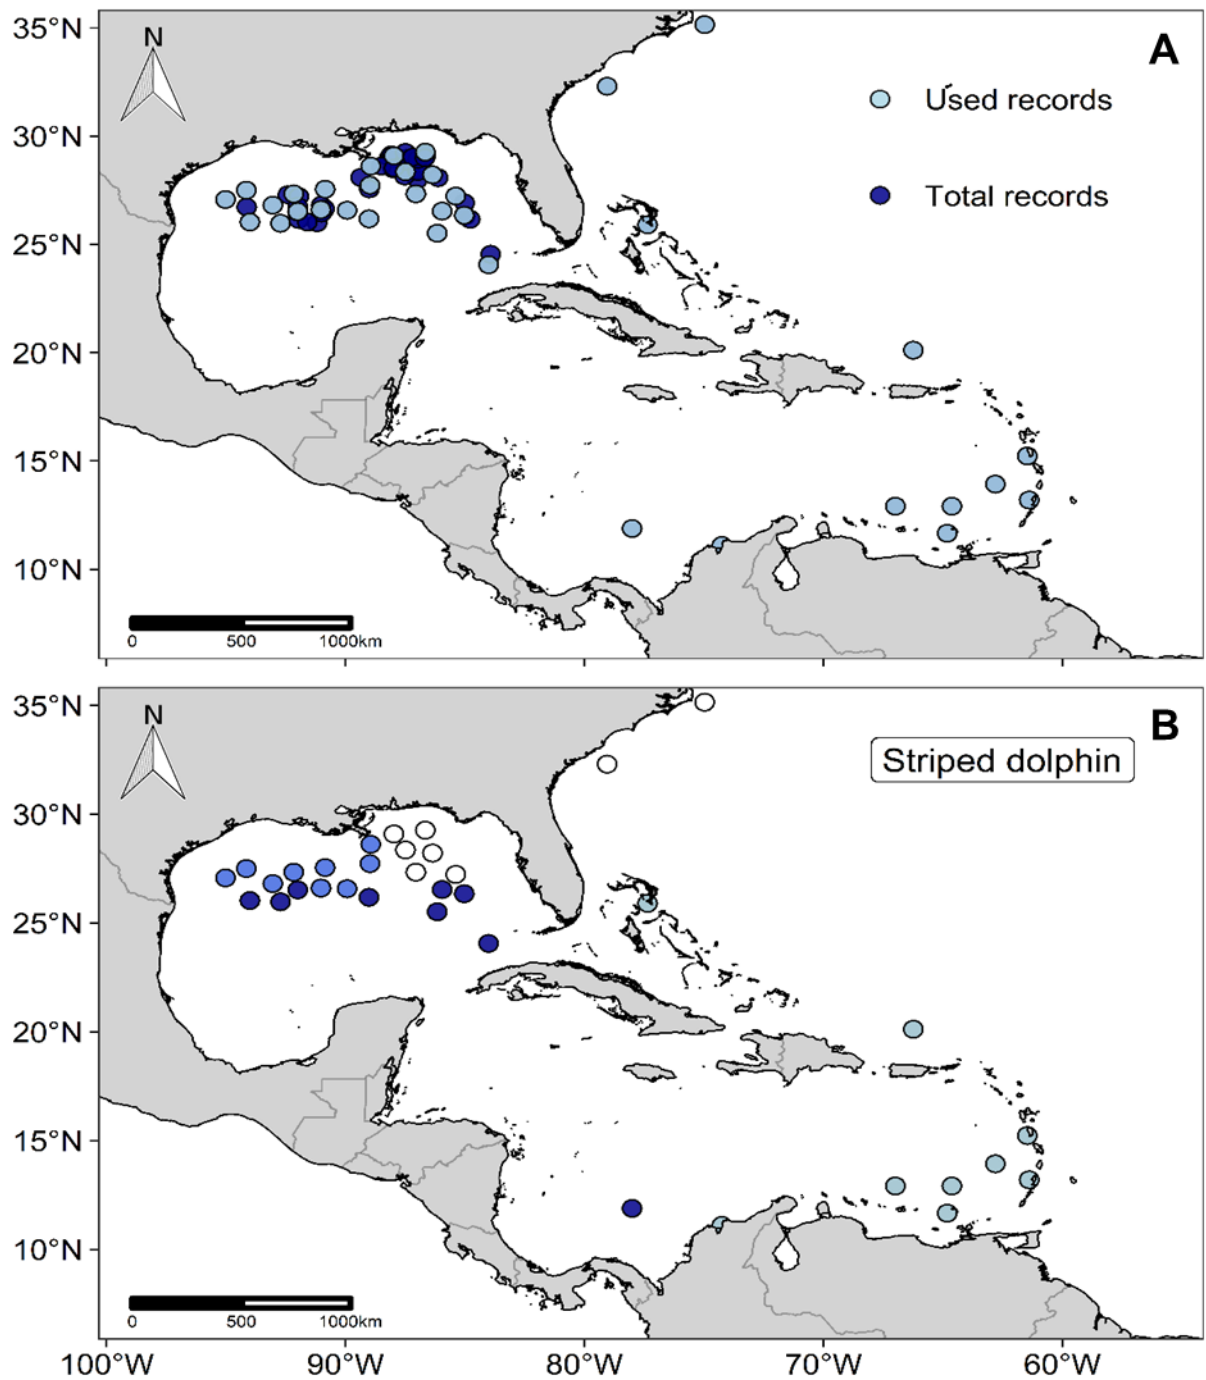

**Figure S10.** (A) Total records found and used records after the spatial filtering for the spinner dolphin. (B) Partitioned records for evaluation and training the models.

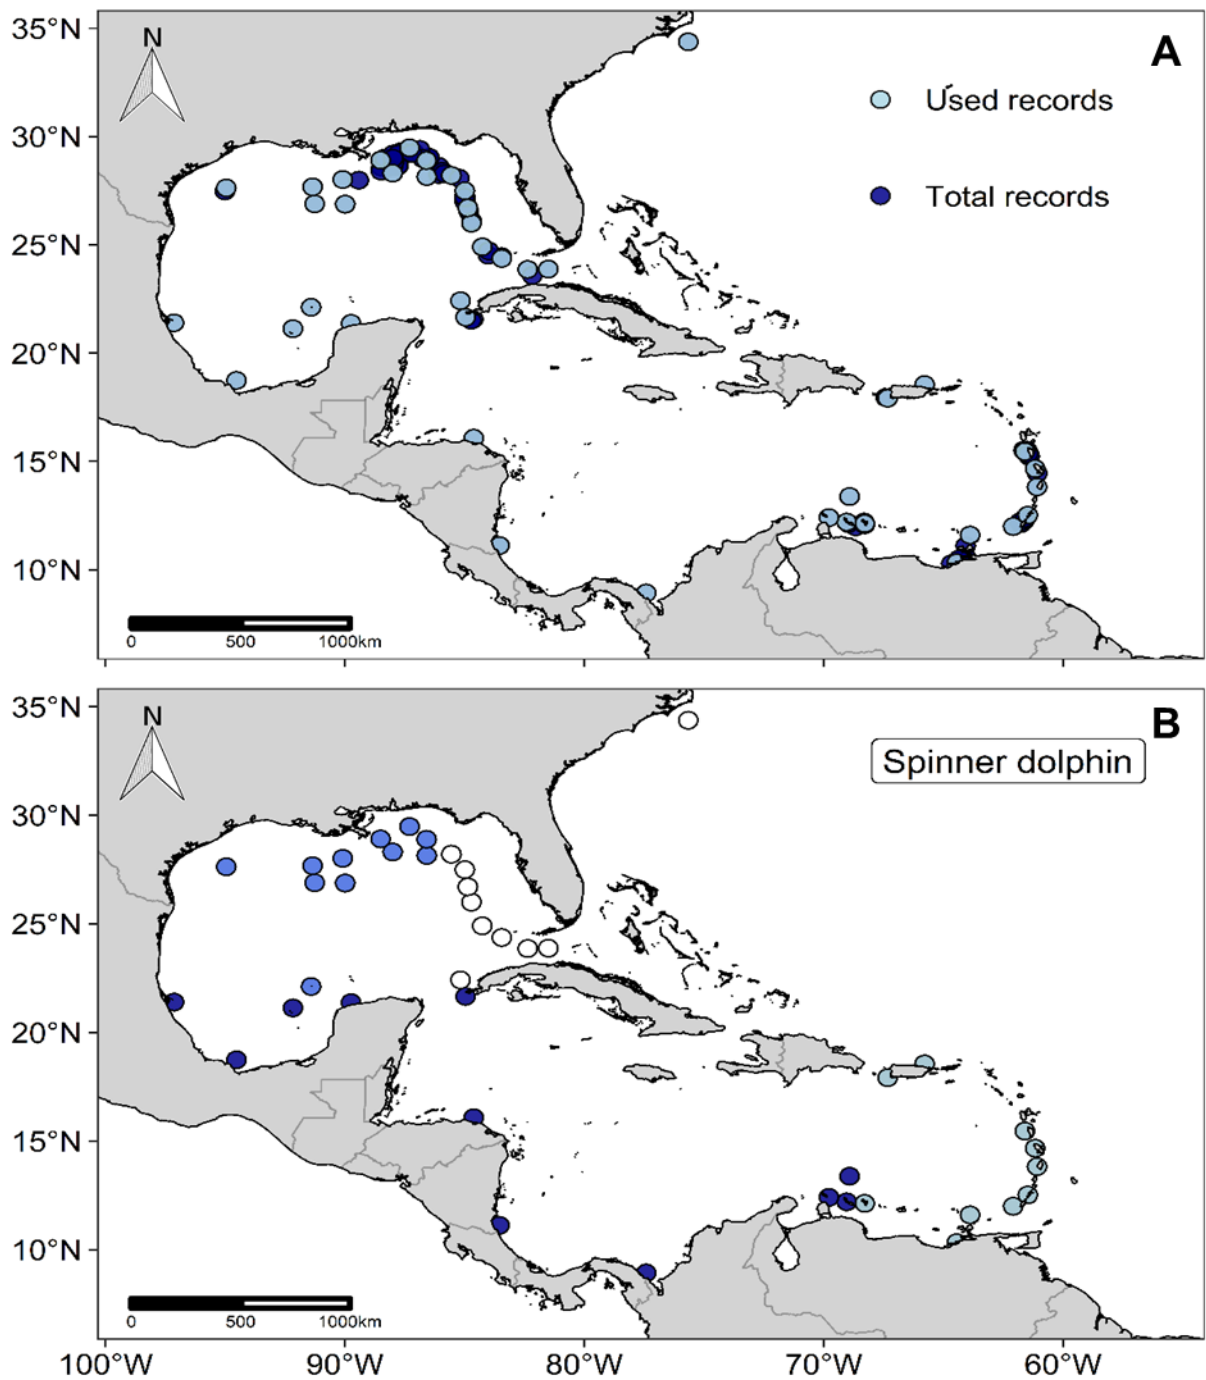

**Figure S11.** (A) Total records found and used records after the spatial filtering for the Clymene dolphin. (B) Partitioned records for evaluation and training the models.

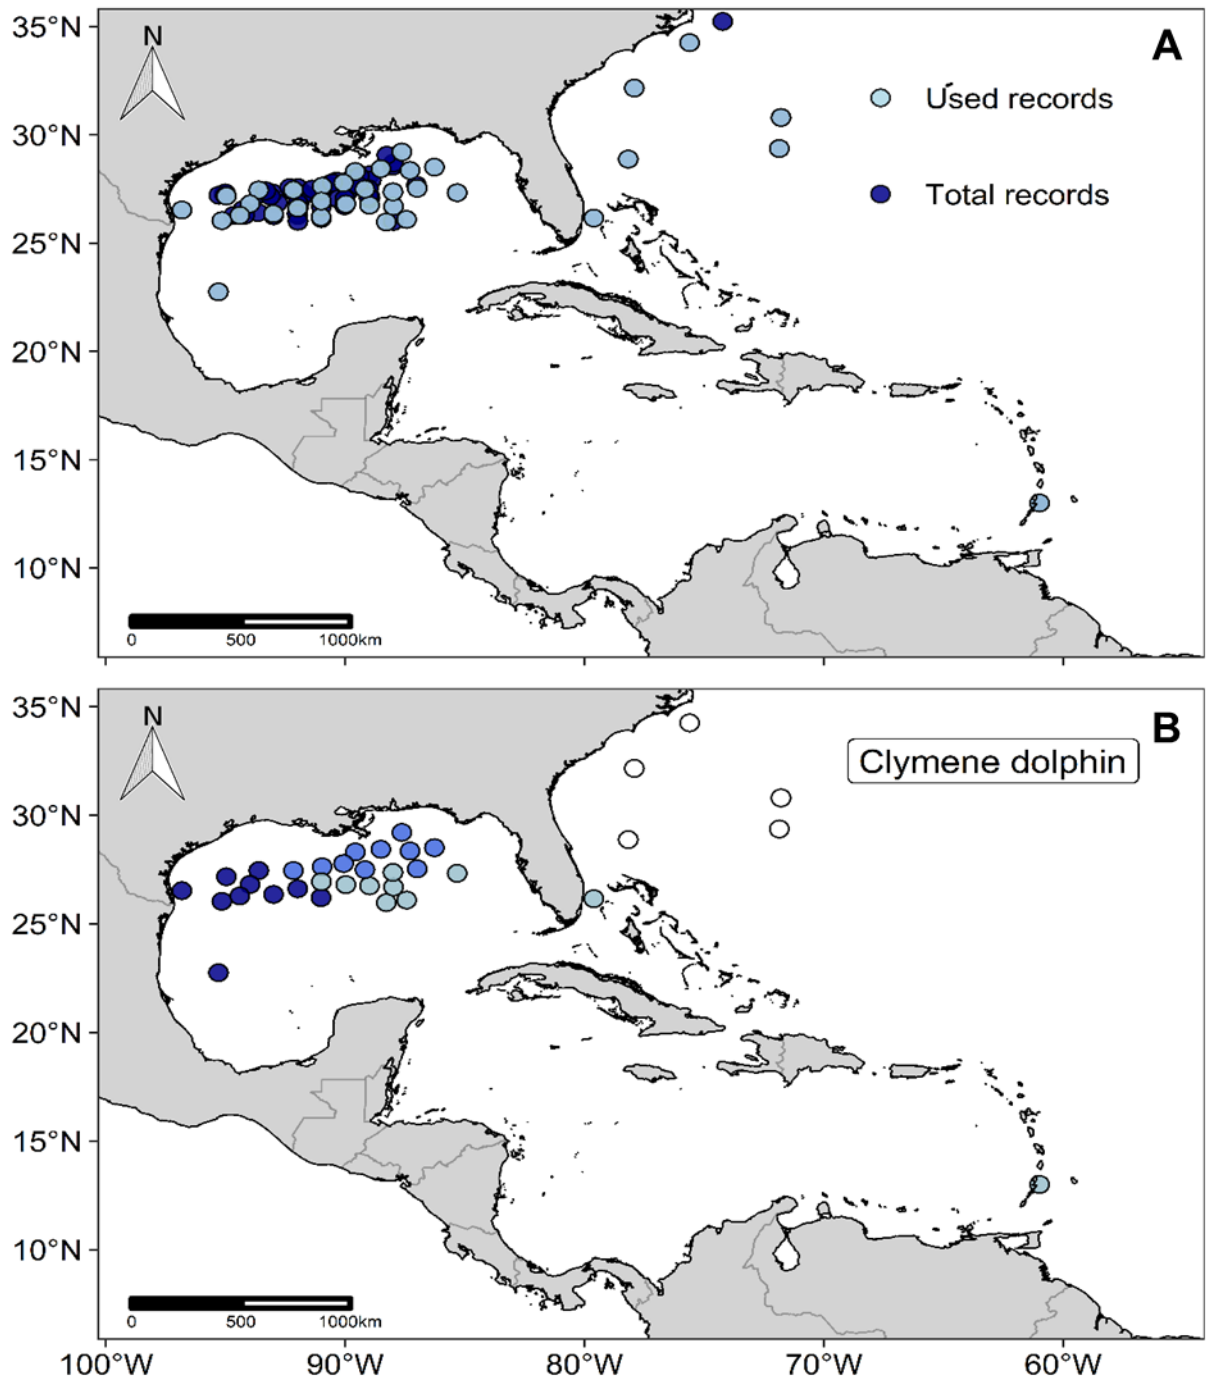

**Figure S12.** (A) Total records found and used records after the spatial filtering for the bottlenose dolphin. (B) Partitioned records for evaluation and training the models.

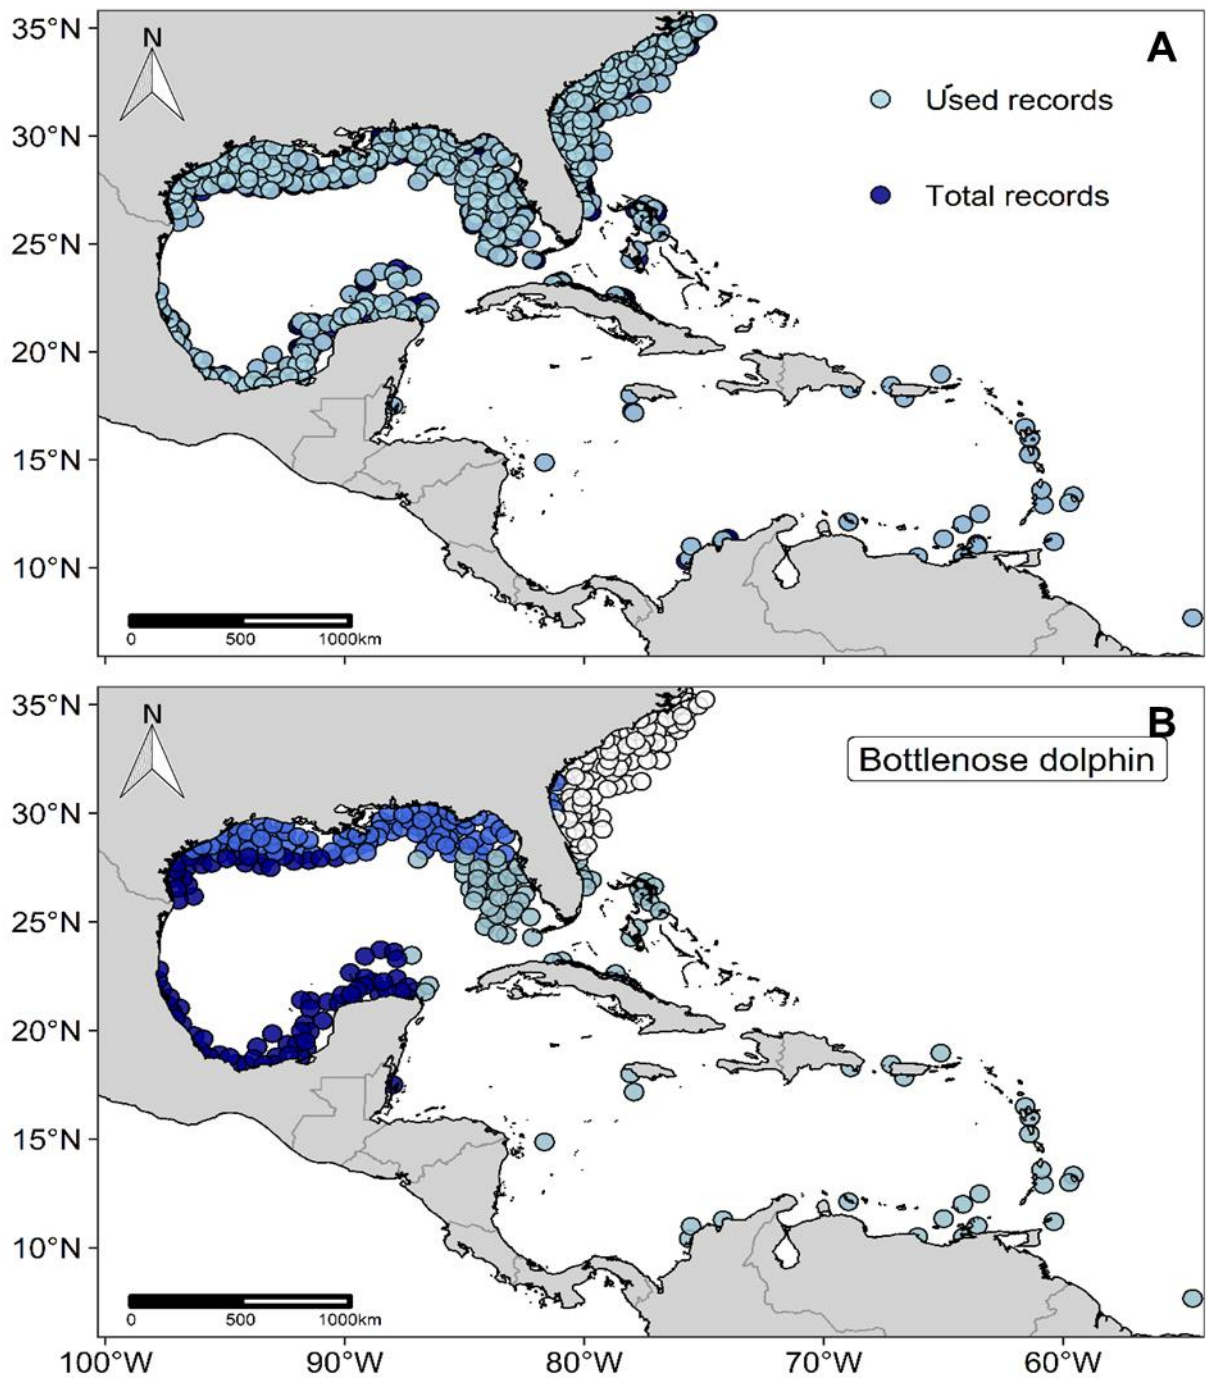

Supplement: Supplemental_Information_S2.pdf [file Supplemental_Information_S2.pdf]
