# Supplementary material for: Habitat suitability of cetaceans in the Gulf of Mexico using an ecological niche modeling approach
Source: PeerJ. 2021 Mar 17;9:e10834. doi: 10.7717/peerj.10834 (PMC7980700; doi:10.7717/peerj.10834)
Supplement: Data S1 [file peerj-09-10834-s001.xlsx]

## Sheet: Sperm whale
Species	Locality	Day	Month	Year	Longitude	Latitude	Group size	Reference
Physeter macrocephalus	Gulf of Mexico	4	11	1980	-96.65	23.2	3	Collum and Fritts (1985)
Physeter macrocephalus	Gulf of Mexico	4	11	1980	-96.7166	23.1333	4	Collum and Fritts (1985)
Physeter macrocephalus	Gulf of Mexico	16	5	1983	-93.9833	20.9666	3	Urban and Aguayo (1983)
Physeter macrocephalus	Gulf of Mexico	16	5	1983	-93.1833	20.95	1	Urban and Aguayo (1983)
Physeter macrocephalus	Gulf of Mexico	15	5	1990	-86.4277	28.9777	NA	NOAA (1990)
Physeter macrocephalus	Gulf of Mexico	18	5	1990	-90.0083	26.4305	NA	NOAA (1990)
Physeter macrocephalus	Gulf of Mexico	18	5	1990	-90.0027	26.7444	NA	NOAA (1990)
Physeter macrocephalus	Gulf of Mexico	24	5	1990	-88.0583	29.0666	NA	NOAA (1990)
Physeter macrocephalus	Gulf of Mexico	24	5	1990	-88.3527	28.8583	NA	NOAA (1990)
Physeter macrocephalus	Gulf of Mexico	24	5	1990	-88.6666	28.6666	NA	NOAA (1990)
Physeter macrocephalus	Gulf of Mexico	25	7	1991	-94.0666	21.0166	3	Jefferson and Lynn (1994)
Physeter macrocephalus	Gulf of Mexico	30	7	1991	-96.5666	22.5833	3	Jefferson and Lynn (1994)
Physeter macrocephalus	Gulf of Mexico	30	7	1991	-96.5833	22.7833	3	Jefferson and Lynn (1994)
Physeter macrocephalus	Gulf of Mexico	30	7	1991	-96.6	23.0166	2	Jefferson and Lynn (1994)
Physeter macrocephalus	Gulf of Mexico	22	4	1992	-86.584	29.5737	1	Garrison (2013)
Physeter macrocephalus	Gulf of Mexico	24	4	1992	-84.1177	24.4833	2	Garrison (2013)
Physeter macrocephalus	Gulf of Mexico	24	4	1992	-84.0875	24.4832	2	Garrison (2013)
Physeter macrocephalus	Gulf of Mexico	24	4	1992	-84.2197	24.4755	2	Garrison (2013)
Physeter macrocephalus	Gulf of Mexico	24	4	1992	-92.8333	26.65	2	Jefferson (1995)
Physeter macrocephalus	Gulf of Mexico	25	4	1992	-86.2863	25.5385	11	Garrison (2013)
Physeter macrocephalus	Gulf of Mexico	29	4	1992	-89.5127	26.0055	2	Garrison (2013)
Physeter macrocephalus	Gulf of Mexico	30	4	1992	-88.1666	29	1	Jefferson (1995)
Physeter macrocephalus	Gulf of Mexico	30	4	1992	-88.1666	28.9833	1	Jefferson (1995)
Physeter macrocephalus	Gulf of Mexico	30	4	1992	-88.1694	28.95	5	Jefferson (1995)
Physeter macrocephalus	Gulf of Mexico	30	4	1992	-87.5055	28.6166	3	Jefferson (1995)
Physeter macrocephalus	Gulf of Mexico	9	5	1992	-86.0618	28.108	6	Garrison (2013)
Physeter macrocephalus	Gulf of Mexico	13	5	1992	-88.0383	26.0403	3	Garrison (2013)
Physeter macrocephalus	Gulf of Mexico	13	5	1992	-88.0093	26.0327	2	Garrison (2013)
Physeter macrocephalus	Gulf of Mexico	13	5	1992	-88.1867	25.9998	4	Garrison (2013)
Physeter macrocephalus	Gulf of Mexico	13	5	1992	-87.9793	26.084	5	Garrison (2013)
Physeter macrocephalus	Gulf of Mexico	13	5	1992	-87.9645	26.409	6	Garrison (2013)
Physeter macrocephalus	Gulf of Mexico	15	5	1992	-88.82	28.8188	2	Garrison (2013)
Physeter macrocephalus	Gulf of Mexico	18	5	1992	-91.0188	26.7338	3	Garrison (2013)
Physeter macrocephalus	Gulf of Mexico	18	5	1992	-91.0285	26.8077	2	Garrison (2013)
Physeter macrocephalus	Gulf of Mexico	27	5	1992	-96.0058	26.8185	4	Garrison (2013)
Physeter macrocephalus	Gulf of Mexico	4	6	1992	-91.0153	26.3442	2	Garrison (2013)
Physeter macrocephalus	Gulf of Mexico	6	6	1992	-89.0077	28.468	2	Garrison (2013)
Physeter macrocephalus	Gulf of Mexico	6	6	1992	-89.0058	28.3197	2	Garrison (2013)
Physeter macrocephalus	Gulf of Mexico	6	1	1993	-87.748	29.1921	4	NOAA (1993)
Physeter macrocephalus	Gulf of Mexico	6	1	1993	-87.7468	29.181	2	NOAA (1993)
Physeter macrocephalus	Gulf of Mexico	22	1	1993	-93.4161	27.3631	3	NOAA (1993)
Physeter macrocephalus	Gulf of Mexico	2	2	1993	-87.9965	28.3526	5	NOAA (1993)
Physeter macrocephalus	Gulf of Mexico	8	2	1993	-93.271	27.4038	3	NOAA (1993)
Physeter macrocephalus	Gulf of Mexico	8	2	1993	-93.3	27.264	3	NOAA (1993)
Physeter macrocephalus	Gulf of Mexico	8	2	1993	-93.2995	27.2131	1	NOAA (1993)
Physeter macrocephalus	Gulf of Mexico	8	2	1993	-93.2951	27.0848	4	NOAA (1993)
Physeter macrocephalus	Gulf of Mexico	8	2	1993	-93.305	26.871	1	NOAA (1993)
Physeter macrocephalus	Gulf of Mexico	15	5	1993	-88	29.1666	1	NOAA (1993)
Physeter macrocephalus	Gulf of Mexico	15	5	1993	-88.0166	28.65	1	NOAA (1993)
Physeter macrocephalus	Gulf of Mexico	16	5	1993	-87.0833	28.65	2	NOAA (1993)
Physeter macrocephalus	Gulf of Mexico	16	5	1993	-87.0833	29.05	2	NOAA (1993)
Physeter macrocephalus	Gulf of Mexico	20	5	1993	-85.9333	26.8166	1	NOAA (1993)
Physeter macrocephalus	Gulf of Mexico	25	5	1993	-88.1666	29.0666	4	Jefferson (1995)
Physeter macrocephalus	Gulf of Mexico	29	5	1993	-91.95	26.4	5	Jefferson (1995)
Physeter macrocephalus	Gulf of Mexico	31	5	1993	-92.8427	26.8036	4	Jefferson (1995)
Physeter macrocephalus	Gulf of Mexico	31	5	1993	-95	26.7666	1	NOAA (1993)
Physeter macrocephalus	Gulf of Mexico	31	5	1993	-95	26.7166	3	NOAA (1993)
Physeter macrocephalus	Gulf of Mexico	1	6	1993	-94.1733	27.5252	10	Jefferson (1995)
Physeter macrocephalus	Gulf of Mexico	2	6	1993	-94.8416	26.3591	5	Jefferson (1995)
Physeter macrocephalus	Gulf of Mexico	2	6	1993	-94.8333	26.4	4	Jefferson (1995)
Physeter macrocephalus	Gulf of Mexico	8	6	1993	-90	26.9333	2	NOAA (1993)
Physeter macrocephalus	Gulf of Mexico	8	6	1993	-90	27.1666	2	NOAA (1993)
Physeter macrocephalus	Gulf of Mexico	15	6	1993	-87.95	29.1166	2	NOAA (1993)
Physeter macrocephalus	Gulf of Mexico	15	6	1993	-87.8	29.2	3	NOAA (1993)
Physeter macrocephalus	Gulf of Mexico	28	8	1993	-87.51	29.3019	3	Jefferson (1995)
Physeter macrocephalus	Gulf of Mexico	28	8	1993	-87.5083	29.2455	7	Jefferson (1995)
Physeter macrocephalus	Gulf of Mexico	28	8	1993	-87.5066	29.1919	1	Jefferson (1995)
Physeter macrocephalus	Gulf of Mexico	28	8	1993	-87.5	28.8	3	Jefferson (1995)
Physeter macrocephalus	Gulf of Mexico	29	8	1993	-88.843	28.7133	1	Jefferson (1995)
Physeter macrocephalus	Gulf of Mexico	29	8	1993	-88.8427	28.638	4	Jefferson (1995)
Physeter macrocephalus	Gulf of Mexico	29	8	1993	-88.8425	28.5944	1	Jefferson (1995)
Physeter macrocephalus	Gulf of Mexico	29	8	1993	-88.8333	28.35	4	Jefferson (1995)
Physeter macrocephalus	Gulf of Mexico	30	8	1993	-88.5002	28.2102	2	Jefferson (1995)
Physeter macrocephalus	Gulf of Mexico	31	8	1993	-90.6727	26.8591	9	Jefferson (1995)
Physeter macrocephalus	Gulf of Mexico	31	8	1993	-90.7138	26.8305	4	Jefferson (1995)
Physeter macrocephalus	Gulf of Mexico	31	8	1993	-90.7138	26.8305	2	Jefferson (1995)
Physeter macrocephalus	Gulf of Mexico	31	8	1993	-90.7591	26.8008	1	Jefferson (1995)
Physeter macrocephalus	Gulf of Mexico	31	8	1993	-90.7591	26.8008	2	Jefferson (1995)
Physeter macrocephalus	Gulf of Mexico	2	9	1993	-92.1347	26.8027	4	Jefferson (1995)
Physeter macrocephalus	Gulf of Mexico	2	9	1993	-92.168	27.1125	4	Jefferson (1995)
Physeter macrocephalus	Gulf of Mexico	2	9	1993	-92.1666	27.1333	2	Jefferson (1995)
Physeter macrocephalus	Gulf of Mexico	4	9	1993	-93.5072	26.8061	3	Jefferson (1995)
Physeter macrocephalus	Gulf of Mexico	4	9	1993	-93.5	26.8166	1	Jefferson (1995)
Physeter macrocephalus	Gulf of Mexico	4	9	1993	-93.508	27.0177	1	Jefferson (1995)
Physeter macrocephalus	Gulf of Mexico	7	12	1993	-89.5008	28.0866	6	Jefferson (1995)
Physeter macrocephalus	Gulf of Mexico	7	12	1993	-89.5011	28.1822	4	Jefferson (1995)
Physeter macrocephalus	Gulf of Mexico	7	12	1993	-89.5	28.2	1	Jefferson (1995)
Physeter macrocephalus	Gulf of Mexico	7	12	1993	-89.5	28.2166	2	Jefferson (1995)
Physeter macrocephalus	Gulf of Mexico	8	12	1993	-90.1666	27.1833	3	Jefferson (1995)
Physeter macrocephalus	Gulf of Mexico	20	4	1994	-88.5166	28.9666	2	NOAA (1994)
Physeter macrocephalus	Gulf of Mexico	20	4	1994	-88.5	28.9333	1	NOAA (1994)
Physeter macrocephalus	Gulf of Mexico	20	4	1994	-88.5	28.8666	2	NOAA (1994)
Physeter macrocephalus	Gulf of Mexico	21	4	1994	-87.9833	28.5666	2	NOAA (1994)
Physeter macrocephalus	Gulf of Mexico	21	4	1994	-87.9833	28.8333	2	NOAA (1994)
Physeter macrocephalus	Gulf of Mexico	23	4	1994	-86.9833	29.2166	1	NOAA (1994)
Physeter macrocephalus	Gulf of Mexico	5	5	1994	-88.1833	28.9833	1	NOAA (1994)
Physeter macrocephalus	Gulf of Mexico	9	5	1994	-91.6	25.9833	2	NOAA (1994)
Physeter macrocephalus	Gulf of Mexico	9	5	1994	-91.6666	26	1	NOAA (1994)
Physeter macrocephalus	Gulf of Mexico	9	5	1994	-91.6833	26	1	NOAA (1994)
Physeter macrocephalus	Gulf of Mexico	15	5	1994	-88.6666	27.4833	1	NOAA (1994)
Physeter macrocephalus	Gulf of Mexico	15	5	1994	-88.6666	27.4833	3	NOAA (1994)
Physeter macrocephalus	Gulf of Mexico	15	5	1994	-88.65	27.4833	1	NOAA (1994)
Physeter macrocephalus	Gulf of Mexico	15	5	1994	-88.55	27.4833	2	NOAA (1994)
Physeter macrocephalus	Gulf of Mexico	17	5	1994	-84.4833	24.9333	2	NOAA (1994)
Physeter macrocephalus	Gulf of Mexico	17	5	1994	-84.2166	24.8166	1	NOAA (1994)
Physeter macrocephalus	Gulf of Mexico	17	5	1994	-84.15	24.7833	1	NOAA (1994)
Physeter macrocephalus	Gulf of Mexico	17	5	1994	-84.0166	24.7	3	NOAA (1994)
Physeter macrocephalus	Gulf of Mexico	17	5	1994	-84.0333	24.6166	3	NOAA (1994)
Physeter macrocephalus	Gulf of Mexico	17	5	1994	-84.0333	24.5833	6	NOAA (1994)
Physeter macrocephalus	Gulf of Mexico	29	5	1994	-87.2833	28.9833	2	NOAA (1994)
Physeter macrocephalus	Gulf of Mexico	29	5	1994	-87.3333	29.0166	1	NOAA (1994)
Physeter macrocephalus	Gulf of Mexico	29	5	1994	-87.4	29.0833	1	NOAA (1994)
Physeter macrocephalus	Gulf of Mexico	7	6	1994	-89.4	28.1666	3	NOAA (1994)
Physeter macrocephalus	Gulf of Mexico	7	6	1994	-89.2833	28.2833	2	NOAA (1994)
Physeter macrocephalus	Gulf of Mexico	7	6	1994	-89.25	28.3166	2	NOAA (1994)
Physeter macrocephalus	Gulf of Mexico	8	6	1994	-88.4833	28.0333	2	NOAA (1994)
Physeter macrocephalus	Gulf of Mexico	8	6	1994	-88.4666	27.95	2	NOAA (1994)
Physeter macrocephalus	Gulf of Mexico	9	6	1994	-89.3666	27.8833	2	NOAA (1994)
Physeter macrocephalus	Gulf of Mexico	25	8	1994	-84.0666	24.1333	8	NOAA (1994)
Physeter macrocephalus	Gulf of Mexico	8	9	1994	-89.05	28.4166	9	NOAA (1994)
Physeter macrocephalus	Gulf of Mexico	8	9	1994	-88.9333	28.4666	10	NOAA (1994)
Physeter macrocephalus	Gulf of Mexico	8	9	1994	-88.4333	28.65	8	NOAA (1994)
Physeter macrocephalus	Gulf of Mexico	2	2	1995	-96.7997	22.6833	1	Ortega-Ortiz et al. (1998)
Physeter macrocephalus	Gulf of Mexico	11	3	1995	-94.533	19.7833	1	Ortega-Ortiz et al. (1998)
Physeter macrocephalus	Gulf of Mexico	31	3	1995	-94.2663	19.4333	1	Ortega-Ortiz et al. (1998)
Physeter macrocephalus	Gulf of Mexico	26	5	1995	-94.5997	19.0333	1	Ortega-Ortiz et al. (1998)
Physeter macrocephalus	Gulf of Mexico	29	5	1995	-96.7333	21.3166	2	Ortega-Ortiz et al. (1998)
Physeter macrocephalus	Gulf of Mexico	2	7	1995	-95.7	19.8166	3	Ortega-Ortiz et al. (1998)
Physeter macrocephalus	Gulf of Mexico	19	7	1995	-95.8833	19.6666	3	Ortega-Ortiz et al. (1998)
Physeter macrocephalus	Gulf of Mexico	7	8	1995	-94.8497	19.2333	2	Ortega-Ortiz et al. (1998)
Physeter macrocephalus	Gulf of Mexico	23	8	1995	-95.5663	19.8	3	Ortega-Ortiz et al. (1998)
Physeter macrocephalus	Gulf of Mexico	31	8	1995	-96.3663	20.4333	3	Ortega-Ortiz et al. (1998)
Physeter macrocephalus	Gulf of Mexico	31	8	1995	-96.3497	20.4333	1	Ortega-Ortiz et al. (1998)
Physeter macrocephalus	Gulf of Mexico	3	9	1995	-96.8663	21.9663	2	Ortega-Ortiz et al. (1998)
Physeter macrocephalus	Gulf of Mexico	26	9	1995	-91.533	21.05	5	Ortega-Ortiz et al. (1998)
Physeter macrocephalus	Gulf of Mexico	25	11	1995	-96.1333	21.6	1	Ortega-Ortiz et al. (1998)
Physeter macrocephalus	Gulf of Mexico	25	4	1996	-88.989	28.4408	1	Garrison (2013)
Physeter macrocephalus	Gulf of Mexico	25	4	1996	-88.9893	28.3338	2	Garrison (2013)
Physeter macrocephalus	Gulf of Mexico	25	4	1996	-88.989	28.3792	4	Garrison (2013)
Physeter macrocephalus	Gulf of Mexico	25	4	1996	-88.999	28.5023	1	Garrison (2013)
Physeter macrocephalus	Gulf of Mexico	25	4	1996	-88.99	28.3237	1	Garrison (2013)
Physeter macrocephalus	Gulf of Mexico	25	4	1996	-88.9968	28.5128	1	Garrison (2013)
Physeter macrocephalus	Gulf of Mexico	25	4	1996	-88.9797	28.5825	1	Garrison (2013)
Physeter macrocephalus	Gulf of Mexico	26	4	1996	-89.8855	26.0093	1	Garrison (2013)
Physeter macrocephalus	Gulf of Mexico	13	5	1996	-85.0232	24.7637	1	Garrison (2013)
Physeter macrocephalus	Gulf of Mexico	13	5	1996	-85.005	24.7175	2	Garrison (2013)
Physeter macrocephalus	Gulf of Mexico	16	5	1996	-87.012	27.368	1	Garrison (2013)
Physeter macrocephalus	Gulf of Mexico	16	5	1996	-87.0105	27.381	3	Garrison (2013)
Physeter macrocephalus	Gulf of Mexico	17	5	1996	-87.9985	27.493	1	Garrison (2013)
Physeter macrocephalus	Gulf of Mexico	17	5	1996	-88.0067	27.4915	4	Garrison (2013)
Physeter macrocephalus	Gulf of Mexico	19	5	1996	-89.0348	26.5692	3	Garrison (2013)
Physeter macrocephalus	Gulf of Mexico	19	5	1996	-89.2142	25.9853	1	Garrison (2013)
Physeter macrocephalus	Gulf of Mexico	19	5	1996	-89.1618	25.9835	1	Garrison (2013)
Physeter macrocephalus	Gulf of Mexico	20	5	1996	-90.0033	27.7433	1	Garrison (2013)
Physeter macrocephalus	Gulf of Mexico	20	5	1996	-90.0032	27.7522	2	Garrison (2013)
Physeter macrocephalus	Gulf of Mexico	23	5	1996	-92.9998	26.5007	1	Garrison (2013)
Physeter macrocephalus	Gulf of Mexico	25	5	1996	-89.06	28.6063	1	Garrison (2013)
Physeter macrocephalus	Gulf of Mexico	25	5	1996	-89.134	28.5108	3	Garrison (2013)
Physeter macrocephalus	Gulf of Mexico	2	6	1996	-86.0087	28.054	5	Garrison (2013)
Physeter macrocephalus	Gulf of Mexico	6	6	1996	-86.8597	28.2867	3	Garrison (2013)
Physeter macrocephalus	Gulf of Mexico	17	4	1997	-86.35	29.35	1	NOAA (1997)
Physeter macrocephalus	Gulf of Mexico	19	4	1997	-83.9833	24.6833	1	NOAA (1997)
Physeter macrocephalus	Gulf of Mexico	4	5	1997	-88.9833	28.4	6	NOAA (1997)
Physeter macrocephalus	Gulf of Mexico	12	5	1997	-87.0666	29.0333	3	NOAA (1997)
Physeter macrocephalus	Gulf of Mexico	14	5	1997	-88.9833	26.4	6	NOAA (1997)
Physeter macrocephalus	Gulf of Mexico	15	5	1997	-88.9833	27.9166	5	NOAA (1997)
Physeter macrocephalus	Gulf of Mexico	15	5	1997	-88.9833	28.2333	1	NOAA (1997)
Physeter macrocephalus	Gulf of Mexico	15	5	1997	-88.9833	28.3166	2	NOAA (1997)
Physeter macrocephalus	Gulf of Mexico	15	5	1997	-88.95	28.3833	1	NOAA (1997)
Physeter macrocephalus	Gulf of Mexico	15	5	1997	-88.9833	24.4833	1	NOAA (1997)
Physeter macrocephalus	Gulf of Mexico	15	5	1997	-89.05	28.4333	1	NOAA (1997)
Physeter macrocephalus	Gulf of Mexico	15	5	1997	-89.05	28.4333	4	NOAA (1997)
Physeter macrocephalus	Gulf of Mexico	15	5	1997	-89.15	28.3	1	NOAA (1997)
Physeter macrocephalus	Gulf of Mexico	25	5	1997	-89.6333	28.2666	1	NOAA (1997)
Physeter macrocephalus	Gulf of Mexico	2	6	1997	-86.0167	28.1166	2	NOAA (1997)
Physeter macrocephalus	Gulf of Mexico	8	10	1997	-93.9916	20.5	2	Ortega-Ortiz (2002)
Physeter macrocephalus	Gulf of Mexico	23	3	1998	-94.6538	19.3	1	Ortega-Ortiz (2002)
Physeter macrocephalus	Gulf of Mexico	7	4	1998	-93.7077	21.1527	1	Ortega-Ortiz (2002)
Physeter macrocephalus	Gulf of Mexico	29	9	1999	-85.95	27.9333	1	NOAA (1999)
Physeter macrocephalus	Gulf of Mexico	29	9	1999	-86.05	28	1	NOAA (1999)
Physeter macrocephalus	Gulf of Mexico	29	9	1999	-86.1166	28.05	1	NOAA (1999)
Physeter macrocephalus	Gulf of Mexico	23	4	2000	-84.5	24.6	2	NOAA (2000)
Physeter macrocephalus	Gulf of Mexico	23	4	2000	-84.5	24.6	1	NOAA (2000)
Physeter macrocephalus	Gulf of Mexico	23	4	2000	-84.5666	24.6666	2	NOAA (2000)
Physeter macrocephalus	Gulf of Mexico	26	4	2000	-86.9	28.9833	5	NOAA (2000)
Physeter macrocephalus	Gulf of Mexico	26	4	2000	-86.9833	28.8666	5	NOAA (2000)
Physeter macrocephalus	Gulf of Mexico	29	4	2000	-89	28.4	3	NOAA (2000)
Physeter macrocephalus	Gulf of Mexico	29	4	2000	-89.0333	28.1333	1	NOAA (2000)
Physeter macrocephalus	Gulf of Mexico	30	4	2000	-89.2333	25.9833	4	NOAA (2000)
Physeter macrocephalus	Gulf of Mexico	7	5	2000	-88.8666	28.4666	1	NOAA (2000)
Physeter macrocephalus	Gulf of Mexico	7	5	2000	-88.8333	28.5166	1	NOAA (2000)
Physeter macrocephalus	Gulf of Mexico	7	5	2000	-88.6666	28.7666	11	NOAA (2000)
Physeter macrocephalus	Gulf of Mexico	14	5	2000	-83.9666	24.4833	4	NOAA (2000)
Physeter macrocephalus	Gulf of Mexico	14	5	2000	-83.4666	24.2666	6	NOAA (2000)
Physeter macrocephalus	Gulf of Mexico	16	5	2000	-86	25.35	1	NOAA (2000)
Physeter macrocephalus	Gulf of Mexico	23	5	2000	-91	26	8	NOAA (2000)
Physeter macrocephalus	Gulf of Mexico	28	5	2000	-91.4	27.5	3	NOAA (2000)
Physeter macrocephalus	Gulf of Mexico	28	5	2000	-91.9833	27.5833	7	NOAA (2000)
Physeter macrocephalus	Gulf of Mexico	29	5	2000	-89.3166	28.2333	3	NOAA (2000)
Physeter macrocephalus	Gulf of Mexico	29	5	2000	-89.15	28.3333	3	NOAA (2000)
Physeter macrocephalus	Gulf of Mexico	29	5	2000	-88.55	28.8333	5	NOAA (2000)
Physeter macrocephalus	Gulf of Mexico	29	6	2000	-89.1925	28.0701	NA	NOAA (2000)
Physeter macrocephalus	Gulf of Mexico	2	7	2000	-89.6938	27.8815	NA	NOAA (2000)
Physeter macrocephalus	Gulf of Mexico	7	7	2000	-89.8238	28.7148	NA	NOAA (2000)
Physeter macrocephalus	Gulf of Mexico	12	7	2000	-88.6168	28.7185	NA	NOAA (2000)
Physeter macrocephalus	Gulf of Mexico	12	7	2000	-88.7386	28.6953	NA	NOAA (2000)
Physeter macrocephalus	Gulf of Mexico	12	7	2000	-88.7438	28.6918	NA	NOAA (2000)
Physeter macrocephalus	Gulf of Mexico	12	7	2000	-88.7543	28.6821	NA	NOAA (2000)
Physeter macrocephalus	Gulf of Mexico	12	7	2000	-88.7688	28.6533	NA	NOAA (2000)
Physeter macrocephalus	Gulf of Mexico	12	7	2000	-89.0293	28.1246	NA	NOAA (2000)
Physeter macrocephalus	Gulf of Mexico	13	7	2000	-89.0755	28.2223	NA	NOAA (2000)
Physeter macrocephalus	Gulf of Mexico	13	7	2000	-89.5451	28.1721	NA	NOAA (2000)
Physeter macrocephalus	Gulf of Mexico	14	7	2000	-89.8131	27.8551	NA	NOAA (2000)
Physeter macrocephalus	Gulf of Mexico	15	7	2000	-89.567	28.1943	NA	NOAA (2000)
Physeter macrocephalus	Gulf of Mexico	16	7	2000	-89.5591	28.1863	NA	NOAA (2000)
Physeter macrocephalus	Gulf of Mexico	17	7	2000	-89.6863	28.06	NA	NOAA (2000)
Physeter macrocephalus	Gulf of Mexico	18	7	2000	-89.2075	28.2048	NA	NOAA (2000)
Physeter macrocephalus	Gulf of Mexico	18	7	2000	-89.3145	27.9601	NA	NOAA (2000)
Physeter macrocephalus	Gulf of Mexico	19	7	2000	-89.0005	28.496	NA	NOAA (2000)
Physeter macrocephalus	Gulf of Mexico	20	7	2000	-88.5756	28.6651	NA	NOAA (2000)
Physeter macrocephalus	Gulf of Mexico	21	7	2000	-88.767	28.4838	NA	NOAA (2000)
Physeter macrocephalus	Gulf of Mexico	22	7	2000	-88.5376	28.767	NA	NOAA (2000)
Physeter macrocephalus	Gulf of Mexico	22	7	2000	-88.2085	28.9228	NA	NOAA (2000)
Physeter macrocephalus	Gulf of Mexico	22	7	2000	-88.0563	28.9701	NA	NOAA (2000)
Physeter macrocephalus	Gulf of Mexico	22	7	2000	-88.0551	28.9736	NA	NOAA (2000)
Physeter macrocephalus	Gulf of Mexico	22	7	2000	-88.0541	28.9741	NA	NOAA (2000)
Physeter macrocephalus	Gulf of Mexico	24	7	2000	-87.1595	27.0005	NA	NOAA (2000)
Physeter macrocephalus	Gulf of Mexico	24	7	2000	-87.1248	28.903	NA	NOAA (2000)
Physeter macrocephalus	Gulf of Mexico	25	7	2000	-87.134	28.7818	NA	NOAA (2000)
Physeter macrocephalus	Gulf of Mexico	26	7	2000	-87.4495	29.2376	NA	NOAA (2000)
Physeter macrocephalus	Gulf of Mexico	17	3	2001	-84.0833	24.4333	5	NOAA (2001)
Physeter macrocephalus	Gulf of Mexico	18	3	2001	-84.4833	24.7666	3	NOAA (2001)
Physeter macrocephalus	Gulf of Mexico	19	3	2001	-84.2666	24.7	3	NOAA (2001)
Physeter macrocephalus	Gulf of Mexico	19	3	2001	-84.25	24.6833	4	NOAA (2001)
Physeter macrocephalus	Gulf of Mexico	20	3	2001	-84	24.5	1	NOAA (2001)
Physeter macrocephalus	Gulf of Mexico	24	3	2001	-84.55	25.3333	2	NOAA (2001)
Physeter macrocephalus	Gulf of Mexico	25	3	2001	-84.5166	25.0333	6	NOAA (2001)
Physeter macrocephalus	Gulf of Mexico	26	3	2001	-84.9333	25.2666	9	NOAA (2001)
Physeter macrocephalus	Gulf of Mexico	28	3	2001	-84.3166	24.6333	1	NOAA (2001)
Physeter macrocephalus	Gulf of Mexico	31	3	2001	-85.35	27.3833	4	NOAA (2001)
Physeter macrocephalus	Gulf of Mexico	1	4	2001	-85.5333	27.9666	4	NOAA (2001)
Physeter macrocephalus	Gulf of Mexico	30	4	2001	-92	27.2333	3	NOAA (2001)
Physeter macrocephalus	Gulf of Mexico	1	5	2001	-93	27.4666	3	NOAA (2001)
Physeter macrocephalus	Gulf of Mexico	6	5	2001	-92.3833	27.4333	2	NOAA (2001)
Physeter macrocephalus	Gulf of Mexico	14	5	2001	-84.3	24.3333	3	NOAA (2001)
Physeter macrocephalus	Gulf of Mexico	14	5	2001	-84.3833	24.3833	1	NOAA (2001)
Physeter macrocephalus	Gulf of Mexico	14	5	2001	-84.4833	24.9333	2	NOAA (2001)
Physeter macrocephalus	Gulf of Mexico	18	5	2001	-87.4166	26.05	3	NOAA (2001)
Physeter macrocephalus	Gulf of Mexico	18	5	2001	-87.9833	26	1	NOAA (2001)
Physeter macrocephalus	Gulf of Mexico	18	5	2001	-87.9833	26	2	NOAA (2001)
Physeter macrocephalus	Gulf of Mexico	18	5	2001	-87.9833	26.0333	1	NOAA (2001)
Physeter macrocephalus	Gulf of Mexico	19	5	2001	-87.9833	28.1833	4	NOAA (2001)
Physeter macrocephalus	Gulf of Mexico	19	5	2001	-87.9833	28.2666	2	NOAA (2001)
Physeter macrocephalus	Gulf of Mexico	23	5	2001	-91.3333	26	3	NOAA (2001)
Physeter macrocephalus	Gulf of Mexico	23	5	2001	-91.9833	26.2166	5	NOAA (2001)
Physeter macrocephalus	Gulf of Mexico	24	5	2001	-93	27.4	1	NOAA (2001)
Physeter macrocephalus	Gulf of Mexico	25	5	2001	-93.9833	27.1666	3	NOAA (2001)
Physeter macrocephalus	Gulf of Mexico	25	5	2001	-93.9833	27.3166	1	NOAA (2001)
Physeter macrocephalus	Gulf of Mexico	25	5	2001	-93.9833	27.3333	1	NOAA (2001)
Physeter macrocephalus	Gulf of Mexico	25	5	2001	-93.9833	27.4333	2	NOAA (2001)
Physeter macrocephalus	Gulf of Mexico	25	5	2001	-94.0666	27.6166	1	NOAA (2001)
Physeter macrocephalus	Gulf of Mexico	27	5	2001	-95.9833	26.4166	1	NOAA (2001)
Physeter macrocephalus	Gulf of Mexico	27	5	2001	-95.9666	26.7	3	NOAA (2001)
Physeter macrocephalus	Gulf of Mexico	27	5	2001	-95.9666	26.7333	2	NOAA (2001)
Physeter macrocephalus	Gulf of Mexico	28	5	2001	-94.1	27.65	1	NOAA (2001)
Physeter macrocephalus	Gulf of Mexico	30	5	2001	-88.8666	28.2333	5	NOAA (2001)
Physeter macrocephalus	Gulf of Mexico	30	5	2001	-88.7666	28.2	2	NOAA (2001)
Physeter macrocephalus	Gulf of Mexico	30	5	2001	-88.65	28.6666	11	NOAA (2001)
Physeter macrocephalus	Gulf of Mexico	28	9	2001	-87.1833	29.2666	1	NOAA (2001)
Physeter macrocephalus	Gulf of Mexico	28	9	2001	-87.35	29.2166	1	NOAA (2001)
Physeter macrocephalus	Gulf of Mexico	28	9	2001	-87.1833	29.1833	1	NOAA (2001)
Physeter macrocephalus	Gulf of Mexico	23	6	2002	-90.2029	27.4856	1	Epperson (2013)
Physeter macrocephalus	Gulf of Mexico	23	6	2002	-90.2203	27.4892	1	Epperson (2013)
Physeter macrocephalus	Gulf of Mexico	23	6	2002	-90.1755	27.545	1	Epperson (2013)
Physeter macrocephalus	Gulf of Mexico	23	6	2002	-90.1723	27.685	1	Epperson (2013)
Physeter macrocephalus	Gulf of Mexico	23	6	2002	-90.2206	27.495	1	Epperson (2013)
Physeter macrocephalus	Gulf of Mexico	23	6	2002	-90.1762	27.6753	1	Epperson (2013)
Physeter macrocephalus	Gulf of Mexico	23	6	2002	-90.176	27.5531	2	Epperson (2013)
Physeter macrocephalus	Gulf of Mexico	23	6	2002	-90.2154	27.4828	1	Epperson (2013)
Physeter macrocephalus	Gulf of Mexico	23	6	2002	-90.1807	27.5058	1	Epperson (2013)
Physeter macrocephalus	Gulf of Mexico	23	6	2002	-90.1834	27.5032	1	Epperson (2013)
Physeter macrocephalus	Gulf of Mexico	23	6	2002	-90.1792	27.5072	1	Epperson (2013)
Physeter macrocephalus	Gulf of Mexico	24	6	2002	-89.6027	28.2187	2	Epperson (2013)
Physeter macrocephalus	Gulf of Mexico	24	6	2002	-89.6037	28.2078	1	Epperson (2013)
Physeter macrocephalus	Gulf of Mexico	24	6	2002	-89.6047	28.2587	1	Epperson (2013)
Physeter macrocephalus	Gulf of Mexico	24	6	2002	-89.6166	28.1247	1	Epperson (2013)
Physeter macrocephalus	Gulf of Mexico	24	6	2002	-89.6083	28.2443	1	Epperson (2013)
Physeter macrocephalus	Gulf of Mexico	26	6	2002	-89.0846	28.1801	1	Epperson (2013)
Physeter macrocephalus	Gulf of Mexico	26	6	2002	-89.0794	28.1762	1	Epperson (2013)
Physeter macrocephalus	Gulf of Mexico	2	7	2002	-88.501	28.8139	1	Epperson (2013)
Physeter macrocephalus	Gulf of Mexico	3	7	2002	-88.8115	28.7355	2	Epperson (2013)
Physeter macrocephalus	Gulf of Mexico	7	7	2002	-88.777	28.6878	3	Epperson (2013)
Physeter macrocephalus	Gulf of Mexico	7	7	2002	-88.778	28.6879	1	Epperson (2013)
Physeter macrocephalus	Gulf of Mexico	1	6	2003	-94.6757	27.4398	2	Epperson (2013)
Physeter macrocephalus	Gulf of Mexico	1	6	2003	-94.7104	27.4135	1	Epperson (2013)
Physeter macrocephalus	Gulf of Mexico	2	6	2003	-93.9438	27.3985	2	Epperson (2013)
Physeter macrocephalus	Gulf of Mexico	4	6	2003	-94.0758	27.319	2	Epperson (2013)
Physeter macrocephalus	Gulf of Mexico	5	6	2003	-93.1897	27.4466	2	Epperson (2013)
Physeter macrocephalus	Gulf of Mexico	5	6	2003	-93.2058	27.4532	2	Epperson (2013)
Physeter macrocephalus	Gulf of Mexico	8	6	2003	-90.6937	27.4873	1	Epperson (2013)
Physeter macrocephalus	Gulf of Mexico	9	6	2003	-90.3634	27.5731	1	Epperson (2013)
Physeter macrocephalus	Gulf of Mexico	10	6	2003	-89.1867	28.2661	1	Epperson (2013)
Physeter macrocephalus	Gulf of Mexico	13	6	2003	-87.5388	29.1954	1	Epperson (2013)
Physeter macrocephalus	Gulf of Mexico	14	6	2003	-86.9645	28.6221	1	Epperson (2013)
Physeter macrocephalus	Gulf of Mexico	15	6	2003	-87.379	28.6867	1	Epperson (2013)
Physeter macrocephalus	Gulf of Mexico	16	6	2003	-88.8725	28.593	1	Epperson (2013)
Physeter macrocephalus	Gulf of Mexico	18	6	2003	-88.9225	28.6927	1	Epperson (2013)
Physeter macrocephalus	Gulf of Mexico	20	6	2003	-90.9102	27.768	3	Epperson (2013)
Physeter macrocephalus	Gulf of Mexico	20	6	2003	-90.911	27.7688	1	Epperson (2013)
Physeter macrocephalus	Gulf of Mexico	3	7	2003	-88.9785	28.6462	NA	Epperson (2013)
Physeter macrocephalus	Gulf of Mexico	31	5	2004	-86.9129	28.5518	1	Epperson (2013)
Physeter macrocephalus	Gulf of Mexico	31	5	2004	-86.9117	28.5531	1	Epperson (2013)
Physeter macrocephalus	Gulf of Mexico	4	12	2007	-95.6261	27.423	4	Holts et al. (2014)
Physeter macrocephalus	Gulf of Mexico	4	12	2007	-95.6268	27.4129	1	Holts et al. (2014)
Physeter macrocephalus	Gulf of Mexico	4	12	2007	-95.6282	27.3973	1	Holts et al. (2014)
Physeter macrocephalus	Gulf of Mexico	4	12	2007	-95.6251	27.436	1	Holts et al. (2014)
Physeter macrocephalus	Gulf of Mexico	5	12	2007	-95.505	27.16	2	Holts et al. (2014)
Physeter macrocephalus	Gulf of Mexico	22	8	2015	-95.8185	19.5355	3	CiGOM (2018)
Physeter macrocephalus	Southeast U.S. Continental Shelf	27	2	1979	-75.033	35.083	3	Kenney (2013)
Physeter macrocephalus	Southeast U.S. Continental Shelf	23	5	1995	-77.6867	26.1817	4	Dunn (2013)
Physeter macrocephalus	Southeast U.S. Continental Shelf	14	8	1996	-76.9037	26.6473	4	Dunn (2013)
Physeter macrocephalus	Southeast U.S. Continental Shelf	6	3	1997	-77.0399	26.6752	1	Dunn (2013)
Physeter macrocephalus	Southeast U.S. Continental Shelf	4	8	1997	-77.3315	25.9173	15	Dunn (2013)
Physeter macrocephalus	Southeast U.S. Continental Shelf	6	8	1997	-77.4007	25.9697	2	Dunn (2013)
Physeter macrocephalus	Southeast U.S. Continental Shelf	21	5	1998	-77.1793	26.023	5	Dunn (2013)
Physeter macrocephalus	Southeast U.S. Continental Shelf	11	4	1999	-77.364	25.9458	6	Dunn (2013)
Physeter macrocephalus	Southeast U.S. Continental Shelf	26	5	1999	-77.5001	26.0285	5	Dunn (2006)
Physeter macrocephalus	Southeast U.S. Continental Shelf	10	6	2000	-77.3716	25.9446	2	Dunn (2013)
Physeter macrocephalus	Southeast U.S. Continental Shelf	18	11	2000	-77.3722	25.9455	4	Dunn (2013)
Physeter macrocephalus	Southeast U.S. Continental Shelf	26	2	2001	-77.5642	26.0664	1	Dunn (2013)
Physeter macrocephalus	Southeast U.S. Continental Shelf	19	6	2001	-77.6078	26.1137	5	Dunn (2013)
Physeter macrocephalus	Southeast U.S. Continental Shelf	8	7	2001	-77.3526	25.9322	10	Dunn (2013)
Physeter macrocephalus	Southeast U.S. Continental Shelf	18	1	2002	-77.5694	26.0881	6	Dunn (2013)
Physeter macrocephalus	Southeast U.S. Continental Shelf	18	1	2002	-77.5759	26.1023	2	Dunn (2013)
Physeter macrocephalus	Southeast U.S. Continental Shelf	14	3	2002	-77.3516	25.928	1	Dunn (2013)
Physeter macrocephalus	Southeast U.S. Continental Shelf	19	3	2002	-77.5867	26.0908	11	Dunn (2013)
Physeter macrocephalus	Southeast U.S. Continental Shelf	27	3	2002	-77.3914	25.9675	1	Dunn (2013)
Physeter macrocephalus	Southeast U.S. Continental Shelf	21	7	2002	-77.5527	26.0553	2	Dunn (2013)
Physeter macrocephalus	Southeast U.S. Continental Shelf	29	7	2002	-77.4816	26.0145	1	Dunn (2013)
Physeter macrocephalus	Southeast U.S. Continental Shelf	4	8	2002	-77.6291	26.1323	1	Dunn (2013)
Physeter macrocephalus	Southeast U.S. Continental Shelf	18	1	2003	-77.4905	26.0141	1	Dunn (2013)
Physeter macrocephalus	Southeast U.S. Continental Shelf	22	6	2003	-77.3769	25.9622	5	Dunn (2013)
Physeter macrocephalus	Southeast U.S. Continental Shelf	9	7	2003	-77.6083	26.2557	1	Dunn (2013)
Physeter macrocephalus	Southeast U.S. Continental Shelf	10	7	2003	-77.3699	25.9436	8	Dunn (2013)
Physeter macrocephalus	Southeast U.S. Continental Shelf	21	7	2003	-77.3651	25.951	6	Dunn (2013)
Physeter macrocephalus	Southeast U.S. Continental Shelf	31	7	2003	-77.5667	26.0594	3	Dunn (2013)
Physeter macrocephalus	Southeast U.S. Continental Shelf	1	8	2003	-77.3362	25.9206	9	Dunn (2013)
Physeter macrocephalus	Southeast U.S. Continental Shelf	2	8	2003	-77.5985	26.1014	5	Dunn (2013)
Physeter macrocephalus	Southeast U.S. Continental Shelf	13	2	2004	-77.4923	26.0129	4	Dunn (2013)
Physeter macrocephalus	Southeast U.S. Continental Shelf	15	3	2004	-77.4584	25.9918	5	Dunn (2013)
Physeter macrocephalus	Southeast U.S. Continental Shelf	16	6	2005	-77.5034	26.0157	13	Dunn (2013)
Physeter macrocephalus	Southeast U.S. Continental Shelf	30	6	2005	-77.5041	26.029	1	Dunn (2013)
Physeter macrocephalus	Southeast U.S. Continental Shelf	14	7	2005	-77.4988	26.0163	5	Dunn (2013)
Physeter macrocephalus	Southeast U.S. Continental Shelf	7	12	2006	-77.3742	25.9508	9	Dunn (2013)
Physeter macrocephalus	Southeast U.S. Continental Shelf	16	12	2006	-77.4276	25.9808	8	Dunn (2013)
Physeter macrocephalus	Southeast U.S. Continental Shelf	30	1	2007	-77.3488	25.9326	1	Dunn (2013)
Physeter macrocephalus	Southeast U.S. Continental Shelf	30	1	2007	-77.2831	25.9006	1	Dunn (2013)
Physeter macrocephalus	Southeast U.S. Continental Shelf	20	6	2007	-77.4295	25.9873	10	Dunn (2013)
Physeter macrocephalus	Southeast U.S. Continental Shelf	26	6	2007	-77.5182	26.0256	7	Dunn (2013)
Physeter macrocephalus	Southeast U.S. Continental Shelf	12	1	2008	-77.5362	26.0449	2	Dunn (2013)
Physeter macrocephalus	Southeast U.S. Continental Shelf	13	6	2008	-75.2537	34.9048	2	McLellan (2013)
Physeter macrocephalus	Southeast U.S. Continental Shelf	14	2	2009	-77.4349	25.9869	7	Dunn (2013)
Physeter macrocephalus	Southeast U.S. Continental Shelf	5	5	2009	-77.3542	25.9474	7	Dunn (2013)
Physeter macrocephalus	Southeast U.S. Continental Shelf	20	5	2009	-77.3529	25.9291	12	Dunn (2013)
Physeter macrocephalus	Southeast U.S. Continental Shelf	3	6	2009	-77.8245	26.3322	9	Dunn (2013)
Physeter macrocephalus	Southeast U.S. Continental Shelf	10	7	2009	-77.3505	25.9356	7	Dunn (2013)
Physeter macrocephalus	Southeast U.S. Continental Shelf	10	7	2009	-77.4969	26.0099	5	Dunn (2013)
Physeter macrocephalus	Southeast U.S. Continental Shelf	22	7	2009	-77.3565	25.9437	2	Dunn (2013)
Physeter macrocephalus	Southeast U.S. Continental Shelf	28	7	2009	-77.5381	26.0414	4	Dunn (2013)
Physeter macrocephalus	Southeast U.S. Continental Shelf	7	5	2010	-80.1486	30.1483	2	McLellan (2011)
Physeter macrocephalus	Southeast U.S. Continental Shelf	6	2	2011	-77.6661	26.1473	6	Dunn (2013)
Physeter macrocephalus	Southeast U.S. Continental Shelf	19	2	2011	-77.3621	25.9398	4	Dunn (2013)
Physeter macrocephalus	Southeast U.S. Continental Shelf	7	6	2011	-78.4347	26.4409	10	Dunn (2013)
Physeter macrocephalus	Southeast U.S. Continental Shelf	8	6	2011	-78.0724	26.4834	3	Dunn (2013)
Physeter macrocephalus	Southeast U.S. Continental Shelf	20	7	2011	-77.3951	25.9626	12	Dunn (2013)
Physeter macrocephalus	Southeast U.S. Continental Shelf	28	7	2011	-77.5877	26.0751	3	Dunn (2013)
Physeter macrocephalus	Southeast U.S. Continental Shelf	31	7	2011	-74.9822	35.1431	1	McLellan (2014)
Physeter macrocephalus	Southeast U.S. Continental Shelf	21	1	2014	-80.0831	30.5062	1	McLellan (2015)
Physeter macrocephalus	Southeast U.S. Continental Shelf	9	5	2017	-79.6964	30.5732	1	McLellan (2018)
Physeter macrocephalus	Southeast U.S. Continental Shelf	18	4	1978	-61.05	15.033	20	Kenney (2013)
Physeter macrocephalus	Southeast U.S. Continental Shelf	21	4	1978	-76.367	24.833	4	Kenney (2013)
Physeter macrocephalus	Caribbean Sea	NA	NA	1984	-63.85	10.9166	1	Romero et al. (2001)
Physeter macrocephalus	Caribbean Sea	NA	9	1989	-63.1166	11	2	Romero et al. (2001)
Physeter macrocephalus	Caribbean Sea	11	8	1990	-81.7	12.65	10	Pardo et al. (2009)
Physeter macrocephalus	Caribbean Sea	8	6	1991	-77.4166	22.1	4	Jefferson and Lynn (1994)
Physeter macrocephalus	Caribbean Sea	NA	1	1992	-65.95	10.3333	4	Romero et al. (2001)
Physeter macrocephalus	Caribbean Sea	14	5	1992	-77.0798	25.9637	11	Dunn (2013)
Physeter macrocephalus	Caribbean Sea	8	6	1992	-84.635	22.5733	1	Whitt et al. (2011)
Physeter macrocephalus	Caribbean Sea	6	3	1993	-72.5	22.1667	2	Dunn (2013)
Physeter macrocephalus	Caribbean Sea	27	7	1993	-77.0783	25.7517	4	Dunn (2013)
Physeter macrocephalus	Caribbean Sea	3	1	1994	-61.5106	15.4761	4	Lanfredi and di Sciara (2014)
Physeter macrocephalus	Caribbean Sea	7	1	1994	-61.1575	14.6022	3	Lanfredi and di Sciara (2014)
Physeter macrocephalus	Caribbean Sea	15	1	1994	-61.4683	15.4483	1	Lanfredi and di Sciara (2014)
Physeter macrocephalus	Caribbean Sea	18	1	1994	-61.5489	15.6011	6	Lanfredi and di Sciara (2014)
Physeter macrocephalus	Caribbean Sea	21	1	1994	-61.1511	14.5736	5	Lanfredi and di Sciara (2014)
Physeter macrocephalus	Caribbean Sea	23	1	1994	-61.1939	14.5831	2	Lanfredi and di Sciara (2014)
Physeter macrocephalus	Caribbean Sea	26	1	1994	-61.1044	14.4581	2	Lanfredi and di Sciara (2014)
Physeter macrocephalus	Caribbean Sea	1	2	1994	-61.4197	15.3136	5	Lanfredi and di Sciara (2014)
Physeter macrocephalus	Caribbean Sea	1	2	1994	-61.4761	15.3856	1	Lanfredi and di Sciara (2014)
Physeter macrocephalus	Caribbean Sea	2	2	1994	-61.5267	15.4892	1	Lanfredi and di Sciara (2014)
Physeter macrocephalus	Caribbean Sea	6	2	1994	-61.1469	14.5339	9	Lanfredi and di Sciara (2014)
Physeter macrocephalus	Caribbean Sea	12	2	1994	-61.5264	15.4472	1	Lanfredi and di Sciara (2014)
Physeter macrocephalus	Caribbean Sea	1	3	1994	-64.8564	18.1742	3	Lanfredi and di Sciara (2014)
Physeter macrocephalus	Caribbean Sea	28	3	1994	-66.2567	17.7064	4	Lanfredi and di Sciara (2014)
Physeter macrocephalus	Caribbean Sea	1	4	1994	-77.9152	24.2209	1	Dunn (2013)
Physeter macrocephalus	Caribbean Sea	27	4	1994	-77.5	9.5	8	Pardo et al. (2009)
Physeter macrocephalus	Caribbean Sea	9	6	1994	-76.7825	24.6677	1	Dunn (2013)
Physeter macrocephalus	Caribbean Sea	18	6	1994	-76.7947	24.7215	1	Dunn (2013)
Physeter macrocephalus	Caribbean Sea	23	6	1994	-76.575	24.5017	1	Dunn (2013)
Physeter macrocephalus	Caribbean Sea	30	12	1994	-61.4638	15.3398	2	Boisseau (2014)
Physeter macrocephalus	Caribbean Sea	4	1	1995	-61.5537	15.475	4	Boisseau (2014)
Physeter macrocephalus	Caribbean Sea	7	1	1995	-61.453	15.2555	10	Boisseau (2014)
Physeter macrocephalus	Caribbean Sea	8	1	1995	-61.4005	15.2627	1	Boisseau (2014)
Physeter macrocephalus	Caribbean Sea	8	1	1995	-61.3913	15.2908	NA	Boisseau (2014)
Physeter macrocephalus	Caribbean Sea	10	1	1995	-61.4095	15.2792	NA	Boisseau (2014)
Physeter macrocephalus	Caribbean Sea	11	1	1995	-61.4272	15.2295	NA	Boisseau (2014)
Physeter macrocephalus	Caribbean Sea	11	1	1995	-61.4143	15.2483	NA	Boisseau (2014)
Physeter macrocephalus	Caribbean Sea	12	1	1995	-61.4292	15.3335	NA	Boisseau (2014)
Physeter macrocephalus	Caribbean Sea	13	1	1995	-61.5572	15.4927	NA	Boisseau (2014)
Physeter macrocephalus	Caribbean Sea	15	1	1995	-61.4752	15.4008	NA	Boisseau (2014)
Physeter macrocephalus	Caribbean Sea	16	1	1995	-61.5853	15.5163	NA	Boisseau (2014)
Physeter macrocephalus	Caribbean Sea	16	1	1995	-61.471	15.2953	NA	Boisseau (2014)
Physeter macrocephalus	Caribbean Sea	18	1	1995	-76.5475	24.856	1	Dunn (2013)
Physeter macrocephalus	Caribbean Sea	19	1	1995	-61.497	15.337	NA	Boisseau (2014)
Physeter macrocephalus	Caribbean Sea	20	1	1995	-61.586	15.599	NA	Boisseau (2014)
Physeter macrocephalus	Caribbean Sea	25	1	1995	-61.494	15.398	3	Boisseau (2014)
Physeter macrocephalus	Caribbean Sea	26	1	1995	-61.441	15.334	NA	Boisseau (2014)
Physeter macrocephalus	Caribbean Sea	30	1	1995	-61.545	15.376	1	Boisseau (2014)
Physeter macrocephalus	Caribbean Sea	31	1	1995	-65.421	18.0413	2	Roden and Mullin (2000)
Physeter macrocephalus	Caribbean Sea	31	1	1995	-65.524	18.0428	6	Roden and Mullin (2000)
Physeter macrocephalus	Caribbean Sea	1	2	1995	-61.43	15.32	NA	Boisseau (2014)
Physeter macrocephalus	Caribbean Sea	2	2	1995	-61.533	15.275	1	Boisseau (2014)
Physeter macrocephalus	Caribbean Sea	9	2	1995	-63.3772	18.0042	3	Roden and Mullin (2000)
Physeter macrocephalus	Caribbean Sea	11	2	1995	-61.459	15.312	NA	Boisseau (2014)
Physeter macrocephalus	Caribbean Sea	12	2	1995	-61.435	15.246	1	Boisseau (2014)
Physeter macrocephalus	Caribbean Sea	16	2	1995	-61.489	15.437	1	Boisseau (2014)
Physeter macrocephalus	Caribbean Sea	16	2	1995	-61.466	15.342	1	Boisseau (2014)
Physeter macrocephalus	Caribbean Sea	16	2	1995	-61.503	15.488	NA	Boisseau (2014)
Physeter macrocephalus	Caribbean Sea	18	2	1995	-61.46	15.345	2	Boisseau (2014)
Physeter macrocephalus	Caribbean Sea	18	2	1995	-61.479	15.377	1	Boisseau (2014)
Physeter macrocephalus	Caribbean Sea	21	2	1995	-61.467	15.3	NA	Boisseau (2014)
Physeter macrocephalus	Caribbean Sea	26	2	1995	-64.1898	16.9495	3	Roden and Mullin (2000)
Physeter macrocephalus	Caribbean Sea	26	2	1995	-64.6317	17.5493	6	Roden and Mullin (2000)
Physeter macrocephalus	Caribbean Sea	1	3	1995	-61.151	13.747	3	Boisseau (2014)
Physeter macrocephalus	Caribbean Sea	3	3	1995	-61.803	12.191	3	Boisseau (2014)
Physeter macrocephalus	Caribbean Sea	3	3	1995	-61.816	12.203	1	Boisseau (2014)
Physeter macrocephalus	Caribbean Sea	3	3	1995	-61.784	12.2	2	Boisseau (2014)
Physeter macrocephalus	Caribbean Sea	5	3	1995	-78.5835	16.8672	3	Roden and Mullin (2000)
Physeter macrocephalus	Caribbean Sea	23	3	1995	-61.561	15.325	1	Boisseau (2014)
Physeter macrocephalus	Caribbean Sea	15	11	1995	-81.635	21.4358	5	Whitt et al. (2011)
Physeter macrocephalus	Caribbean Sea	9	1	1996	-61.521	15.336	1	Boisseau (2014)
Physeter macrocephalus	Caribbean Sea	10	1	1996	-61.521	15.336	1	Boisseau (2014)
Physeter macrocephalus	Caribbean Sea	11	1	1996	-61.438	15.247	1	Boisseau (2014)
Physeter macrocephalus	Caribbean Sea	12	1	1996	-61.448	15.242	1	Boisseau (2014)
Physeter macrocephalus	Caribbean Sea	13	1	1996	-61.447	15.317	1	Boisseau (2014)
Physeter macrocephalus	Caribbean Sea	19	1	1996	-61.455	15.317	1	Boisseau (2014)
Physeter macrocephalus	Caribbean Sea	20	1	1996	-61.422	15.271	1	Boisseau (2014)
Physeter macrocephalus	Caribbean Sea	21	1	1996	-61.48	15.33	1	Boisseau (2014)
Physeter macrocephalus	Caribbean Sea	22	1	1996	-61.505	15.36	2	Boisseau (2014)
Physeter macrocephalus	Caribbean Sea	26	1	1996	-61.427	15.243	2	Boisseau (2014)
Physeter macrocephalus	Caribbean Sea	27	1	1996	-61.397	15.239	2	Boisseau (2014)
Physeter macrocephalus	Caribbean Sea	28	1	1996	-61.42	15.265	1	Boisseau (2014)
Physeter macrocephalus	Caribbean Sea	30	1	1996	-61.481	15.353	1	Boisseau (2014)
Physeter macrocephalus	Caribbean Sea	1	2	1996	-61.443	15.298	1	Boisseau (2014)
Physeter macrocephalus	Caribbean Sea	6	2	1996	-61.002	14.18	1	Boisseau (2014)
Physeter macrocephalus	Caribbean Sea	14	2	1996	-75.993	23.7518	1	Dunn (2013)
Physeter macrocephalus	Caribbean Sea	25	2	1996	-61.725	12.268	1	Boisseau (2014)
Physeter macrocephalus	Caribbean Sea	27	2	1996	-61.92	12.085	1	Boisseau (2014)
Physeter macrocephalus	Caribbean Sea	17	3	1996	-61.606	12.394	1	Boisseau (2014)
Physeter macrocephalus	Caribbean Sea	20	3	1996	-61.833	12.078	1	Boisseau (2014)
Physeter macrocephalus	Caribbean Sea	23	3	1996	-61.758	12.289	1	Boisseau (2014)
Physeter macrocephalus	Caribbean Sea	2	7	1996	-77.2277	25.8075	4	Dunn (2013)
Physeter macrocephalus	Caribbean Sea	8	8	1996	-77.3333	25.3333	1	Dunn (2013)
Physeter macrocephalus	Caribbean Sea	10	5	1997	-77.3006	25.8357	3	Dunn (2013)
Physeter macrocephalus	Caribbean Sea	13	5	1997	-75.7	23.6333	30	Dunn (2013)
Physeter macrocephalus	Caribbean Sea	14	5	1997	-77.3952	25.9359	1	Dunn (2013)
Physeter macrocephalus	Caribbean Sea	8	7	1997	-77.311	25.906	1	Dunn (2013)
Physeter macrocephalus	Caribbean Sea	3	8	1997	-77.5364	26.0038	16	Dunn (2013)
Physeter macrocephalus	Caribbean Sea	7	1	1998	-61.159	14.5	2	Boisseau (2014)
Physeter macrocephalus	Caribbean Sea	8	1	1998	-61.231	14.724	3	Boisseau (2014)
Physeter macrocephalus	Caribbean Sea	8	1	1998	-61.216	14.688	NA	Boisseau (2014)
Physeter macrocephalus	Caribbean Sea	19	1	1998	-78.0249	25.2458	1	Dunn (2013)
Physeter macrocephalus	Caribbean Sea	18	2	1998	-77.3974	25.9613	2	Dunn (2013)
Physeter macrocephalus	Caribbean Sea	26	2	1998	-77.4359	25.9732	2	Dunn (2013)
Physeter macrocephalus	Caribbean Sea	19	6	1998	-77.3117	25.8744	1	Dunn (2013)
Physeter macrocephalus	Caribbean Sea	NA	NA	1999	-75.1826	19.8975	1	Whitt et al. (2011)
Physeter macrocephalus	Caribbean Sea	19	1	1999	-77.2912	25.8687	9	Dunn (2013)
Physeter macrocephalus	Caribbean Sea	20	1	1999	-77.3987	25.9191	1	Dunn (2013)
Physeter macrocephalus	Caribbean Sea	27	2	1999	-76.733	24.7188	1	Dunn (2013)
Physeter macrocephalus	Caribbean Sea	26	7	1999	-77.3503	25.8977	1	Dunn (2013)
Physeter macrocephalus	Caribbean Sea	28	7	1999	-61.829	12.1588	3	Romero (2014)
Physeter macrocephalus	Caribbean Sea	28	7	1999	-61.8468	12.1558	4	Romero (2014)
Physeter macrocephalus	Caribbean Sea	28	7	1999	-61.8262	12.1592	2	Romero (2014)
Physeter macrocephalus	Caribbean Sea	28	7	1999	-61.8262	12.1592	3	Romero (2014)
Physeter macrocephalus	Caribbean Sea	28	7	1999	-61.8262	12.1592	4	Romero (2014)
Physeter macrocephalus	Caribbean Sea	28	7	1999	-61.8323	12.1558	1	Romero (2014)
Physeter macrocephalus	Caribbean Sea	28	7	1999	-61.8323	12.1558	3	Romero (2014)
Physeter macrocephalus	Caribbean Sea	28	7	1999	-61.8135	12.1645	3	Romero (2014)
Physeter macrocephalus	Caribbean Sea	12	1	2000	-61.805	16.024	1	Boisseau (2014)
Physeter macrocephalus	Caribbean Sea	12	1	2000	-61.805	16.025	3	Boisseau (2014)
Physeter macrocephalus	Caribbean Sea	13	1	2000	-61.833	16.098	1	Boisseau (2014)
Physeter macrocephalus	Caribbean Sea	13	1	2000	-61.823	16.107	2	Boisseau (2014)
Physeter macrocephalus	Caribbean Sea	13	1	2000	-61.853	16.115	1	Boisseau (2014)
Physeter macrocephalus	Caribbean Sea	14	1	2000	-61.938	16.055	1	Boisseau (2014)
Physeter macrocephalus	Caribbean Sea	14	1	2000	-61.958	16.058	1	Boisseau (2014)
Physeter macrocephalus	Caribbean Sea	14	1	2000	-61.938	16.056	2	Boisseau (2014)
Physeter macrocephalus	Caribbean Sea	14	1	2000	-61.938	16.055	2	Boisseau (2014)
Physeter macrocephalus	Caribbean Sea	14	1	2000	-61.943	16.05	1	Boisseau (2014)
Physeter macrocephalus	Caribbean Sea	14	1	2000	-61.946	16.053	2	Boisseau (2014)
Physeter macrocephalus	Caribbean Sea	14	1	2000	-61.948	16.053	3	Boisseau (2014)
Physeter macrocephalus	Caribbean Sea	19	1	2000	-61.864	16.139	2	Boisseau (2014)
Physeter macrocephalus	Caribbean Sea	19	1	2000	-61.849	16.164	1	Boisseau (2014)
Physeter macrocephalus	Caribbean Sea	19	1	2000	-61.83	16.102	1	Boisseau (2014)
Physeter macrocephalus	Caribbean Sea	19	1	2000	-61.879	16.188	2	Boisseau (2014)
Physeter macrocephalus	Caribbean Sea	19	1	2000	-61.851	16.181	1	Boisseau (2014)
Physeter macrocephalus	Caribbean Sea	19	1	2000	-61.877	16.185	2	Boisseau (2014)
Physeter macrocephalus	Caribbean Sea	19	1	2000	-61.837	16.101	1	Boisseau (2014)
Physeter macrocephalus	Caribbean Sea	19	1	2000	-61.885	16.203	4	Boisseau (2014)
Physeter macrocephalus	Caribbean Sea	19	1	2000	-61.873	16.166	4	Boisseau (2014)
Physeter macrocephalus	Caribbean Sea	19	1	2000	-61.85	16.187	1	Boisseau (2014)
Physeter macrocephalus	Caribbean Sea	19	1	2000	-61.877	16.185	2	Boisseau (2014)
Physeter macrocephalus	Caribbean Sea	19	1	2000	-61.876	16.17	1	Boisseau (2014)
Physeter macrocephalus	Caribbean Sea	19	1	2000	-61.88	16.192	2	Boisseau (2014)
Physeter macrocephalus	Caribbean Sea	19	1	2000	-61.853	16.16	2	Boisseau (2014)
Physeter macrocephalus	Caribbean Sea	19	1	2000	-61.876	16.17	1	Boisseau (2014)
Physeter macrocephalus	Caribbean Sea	19	1	2000	-61.821	16.097	1	Boisseau (2014)
Physeter macrocephalus	Caribbean Sea	19	1	2000	-61.876	16.177	1	Boisseau (2014)
Physeter macrocephalus	Caribbean Sea	19	1	2000	-61.82	16.105	1	Boisseau (2014)
Physeter macrocephalus	Caribbean Sea	19	1	2000	-61.82	16.105	1	Boisseau (2014)
Physeter macrocephalus	Caribbean Sea	19	1	2000	-61.873	16.166	1	Boisseau (2014)
Physeter macrocephalus	Caribbean Sea	19	1	2000	-61.88	16.189	4	Boisseau (2014)
Physeter macrocephalus	Caribbean Sea	19	1	2000	-61.82	16.117	2	Boisseau (2014)
Physeter macrocephalus	Caribbean Sea	19	1	2000	-61.82	16.107	2	Boisseau (2014)
Physeter macrocephalus	Caribbean Sea	19	1	2000	-61.866	16.198	1	Boisseau (2014)
Physeter macrocephalus	Caribbean Sea	19	1	2000	-61.877	16.185	1	Boisseau (2014)
Physeter macrocephalus	Caribbean Sea	19	1	2000	-61.83	16.101	2	Boisseau (2014)
Physeter macrocephalus	Caribbean Sea	19	1	2000	-61.868	16.156	1	Boisseau (2014)
Physeter macrocephalus	Caribbean Sea	19	1	2000	-61.881	16.2	1	Boisseau (2014)
Physeter macrocephalus	Caribbean Sea	19	1	2000	-61.821	16.101	2	Boisseau (2014)
Physeter macrocephalus	Caribbean Sea	19	1	2000	-61.876	16.177	2	Boisseau (2014)
Physeter macrocephalus	Caribbean Sea	19	1	2000	-61.858	16.193	1	Boisseau (2014)
Physeter macrocephalus	Caribbean Sea	20	1	2000	-61.83	16.115	1	Boisseau (2014)
Physeter macrocephalus	Caribbean Sea	20	1	2000	-61.866	16.233	2	Boisseau (2014)
Physeter macrocephalus	Caribbean Sea	20	1	2000	-61.826	16.112	1	Boisseau (2014)
Physeter macrocephalus	Caribbean Sea	20	1	2000	-61.824	16.13	1	Boisseau (2014)
Physeter macrocephalus	Caribbean Sea	20	1	2000	-61.855	16.249	1	Boisseau (2014)
Physeter macrocephalus	Caribbean Sea	20	1	2000	-61.853	16.187	2	Boisseau (2014)
Physeter macrocephalus	Caribbean Sea	20	1	2000	-61.854	16.186	1	Boisseau (2014)
Physeter macrocephalus	Caribbean Sea	21	1	2000	-61.862	16.212	4	Boisseau (2014)
Physeter macrocephalus	Caribbean Sea	21	1	2000	-61.911	16.212	2	Boisseau (2014)
Physeter macrocephalus	Caribbean Sea	21	1	2000	-61.856	16.218	2	Boisseau (2014)
Physeter macrocephalus	Caribbean Sea	21	1	2000	-61.859	15.995	3	Boisseau (2014)
Physeter macrocephalus	Caribbean Sea	22	1	2000	-61.886	16.176	1	Boisseau (2014)
Physeter macrocephalus	Caribbean Sea	31	1	2000	-77.2645	25.8225	5	Dunn (2013)
Physeter macrocephalus	Caribbean Sea	1	2	2000	-61.1744	14.6366	1	Boisseau (2014)
Physeter macrocephalus	Caribbean Sea	17	2	2000	-77.2778	25.8905	7	Dunn (2013)
Physeter macrocephalus	Caribbean Sea	20	2	2000	-61.1837	14.6035	4	Garrison (2013)
Physeter macrocephalus	Caribbean Sea	16	3	2000	-61.169	14.499	2	Boisseau (2014)
Physeter macrocephalus	Caribbean Sea	16	3	2000	-61.238	14.7	1	Boisseau (2014)
Physeter macrocephalus	Caribbean Sea	16	3	2000	-61.241	14.708	1	Boisseau (2014)
Physeter macrocephalus	Caribbean Sea	16	3	2000	-61.203	14.582	2	Boisseau (2014)
Physeter macrocephalus	Caribbean Sea	17	3	2000	-61.504	15.365	1	Boisseau (2014)
Physeter macrocephalus	Caribbean Sea	18	3	2000	-61.401	15.24	1	Boisseau (2014)
Physeter macrocephalus	Caribbean Sea	18	3	2000	-61.411	15.278	1	Boisseau (2014)
Physeter macrocephalus	Caribbean Sea	18	3	2000	-61.415	15.254	1	Boisseau (2014)
Physeter macrocephalus	Caribbean Sea	18	3	2000	-61.401	15.238	1	Boisseau (2014)
Physeter macrocephalus	Caribbean Sea	18	3	2000	-61.401	15.24	4	Boisseau (2014)
Physeter macrocephalus	Caribbean Sea	18	3	2000	-61.404	15.242	3	Boisseau (2014)
Physeter macrocephalus	Caribbean Sea	18	3	2000	-61.417	15.267	1	Boisseau (2014)
Physeter macrocephalus	Caribbean Sea	18	3	2000	-61.402	15.236	2	Boisseau (2014)
Physeter macrocephalus	Caribbean Sea	18	3	2000	-61.402	15.236	1	Boisseau (2014)
Physeter macrocephalus	Caribbean Sea	18	3	2000	-61.401	15.24	2	Boisseau (2014)
Physeter macrocephalus	Caribbean Sea	18	3	2000	-61.403	15.246	1	Boisseau (2014)
Physeter macrocephalus	Caribbean Sea	18	3	2000	-61.441	15.26	2	Boisseau (2014)
Physeter macrocephalus	Caribbean Sea	18	3	2000	-61.401	15.24	4	Boisseau (2014)
Physeter macrocephalus	Caribbean Sea	18	3	2000	-61.401	15.24	2	Boisseau (2014)
Physeter macrocephalus	Caribbean Sea	20	3	2000	-61.424	15.223	3	Boisseau (2014)
Physeter macrocephalus	Caribbean Sea	20	3	2000	-61.39	15.257	1	Boisseau (2014)
Physeter macrocephalus	Caribbean Sea	20	3	2000	-61.403	15.239	3	Boisseau (2014)
Physeter macrocephalus	Caribbean Sea	21	3	2000	-61.428	15.221	3	Boisseau (2014)
Physeter macrocephalus	Caribbean Sea	21	3	2000	-61.423	15.216	3	Boisseau (2014)
Physeter macrocephalus	Caribbean Sea	21	3	2000	-61.518	15.329	1	Boisseau (2014)
Physeter macrocephalus	Caribbean Sea	21	3	2000	-61.423	15.227	2	Boisseau (2014)
Physeter macrocephalus	Caribbean Sea	21	3	2000	-61.418	15.211	4	Boisseau (2014)
Physeter macrocephalus	Caribbean Sea	21	3	2000	-61.423	15.227	2	Boisseau (2014)
Physeter macrocephalus	Caribbean Sea	21	3	2000	-61.434	15.232	6	Boisseau (2014)
Physeter macrocephalus	Caribbean Sea	23	3	2000	-61.4	15.207	1	Boisseau (2014)
Physeter macrocephalus	Caribbean Sea	23	3	2000	-61.397	15.206	1	Boisseau (2014)
Physeter macrocephalus	Caribbean Sea	24	3	2000	-61.3482	14.4083	1	Garrison (2013)
Physeter macrocephalus	Caribbean Sea	24	3	2000	-61.0948	14.3223	2	Garrison (2013)
Physeter macrocephalus	Caribbean Sea	24	3	2000	-61.3702	14.4583	11	Garrison (2013)
Physeter macrocephalus	Caribbean Sea	24	3	2000	-61.4305	14.6613	4	Garrison (2013)
Physeter macrocephalus	Caribbean Sea	24	3	2000	-61.4643	14.745	4	Garrison (2013)
Physeter macrocephalus	Caribbean Sea	24	3	2000	-61.4253	14.8168	3	Garrison (2013)
Physeter macrocephalus	Caribbean Sea	24	3	2000	-61.4347	14.8078	1	Garrison (2013)
Physeter macrocephalus	Caribbean Sea	26	3	2000	-64.5828	17.9167	1	Garrison (2013)
Physeter macrocephalus	Caribbean Sea	26	3	2000	-64.1875	17.648	2	Garrison (2013)
Physeter macrocephalus	Caribbean Sea	26	3	2000	-64.1252	17.5717	1	Garrison (2013)
Physeter macrocephalus	Caribbean Sea	26	3	2000	-65.0358	18.1557	1	Garrison (2013)
Physeter macrocephalus	Caribbean Sea	26	3	2000	-64.2027	17.6675	3	Garrison (2013)
Physeter macrocephalus	Caribbean Sea	26	3	2000	-64.5947	17.92	2	Garrison (2013)
Physeter macrocephalus	Caribbean Sea	26	3	2000	-64.1602	17.6147	1	Garrison (2013)
Physeter macrocephalus	Caribbean Sea	26	3	2000	-64.2088	17.6748	2	Garrison (2013)
Physeter macrocephalus	Caribbean Sea	27	3	2000	-61.825	16.113	1	Boisseau (2014)
Physeter macrocephalus	Caribbean Sea	27	3	2000	-61.832	16.128	2	Boisseau (2014)
Physeter macrocephalus	Caribbean Sea	27	3	2000	-61.825	16.113	3	Boisseau (2014)
Physeter macrocephalus	Caribbean Sea	30	3	2000	-61.871	16.202	2	Boisseau (2014)
Physeter macrocephalus	Caribbean Sea	30	3	2000	-61.903	16.164	2	Boisseau (2014)
Physeter macrocephalus	Caribbean Sea	30	3	2000	-61.901	16.195	1	Boisseau (2014)
Physeter macrocephalus	Caribbean Sea	5	4	2000	-76.5168	24.3626	3	Dunn (2013)
Physeter macrocephalus	Caribbean Sea	11	6	2000	-77.2818	25.889	2	Dunn (2013)
Physeter macrocephalus	Caribbean Sea	12	6	2000	-77.467	25.9913	7	Dunn (2013)
Physeter macrocephalus	Caribbean Sea	13	6	2000	-77.4182	25.9609	12	Dunn (2013)
Physeter macrocephalus	Caribbean Sea	23	6	2000	-77.3013	25.8817	9	Dunn (2013)
Physeter macrocephalus	Caribbean Sea	5	7	2000	-77.5269	26.0186	19	Dunn (2013)
Physeter macrocephalus	Caribbean Sea	5	7	2000	-77.5498	26.0259	2	Dunn (2013)
Physeter macrocephalus	Caribbean Sea	6	7	2000	-77.4721	25.9666	17	Dunn (2013)
Physeter macrocephalus	Caribbean Sea	20	7	2000	-77.5018	26.0073	8	Dunn (2013)
Physeter macrocephalus	Caribbean Sea	4	8	2000	-77.4998	26.0088	4	Dunn (2013)
Physeter macrocephalus	Caribbean Sea	19	8	2000	-77.4417	25.9776	8	Dunn (2013)
Physeter macrocephalus	Caribbean Sea	15	1	2001	-77.4158	25.9655	4	Dunn (2013)
Physeter macrocephalus	Caribbean Sea	17	1	2001	-77.4531	25.9792	5	Dunn (2013)
Physeter macrocephalus	Caribbean Sea	17	1	2001	-77.2474	25.8523	2	Dunn (2013)
Physeter macrocephalus	Caribbean Sea	10	2	2001	-64.8	18.9833	7	Swartz et al. (2002)
Physeter macrocephalus	Caribbean Sea	17	2	2001	-64.3333	20.4166	1	Swartz et al. (2002)
Physeter macrocephalus	Caribbean Sea	23	2	2001	-66.4	17.05	5	Swartz et al. (2002)
Physeter macrocephalus	Caribbean Sea	27	2	2001	-68.0166	18.1	4	Swartz et al. (2002)
Physeter macrocephalus	Caribbean Sea	10	2	2001	-77.3501	25.9082	4	Dunn (2013)
Physeter macrocephalus	Caribbean Sea	23	2	2001	-77.4103	25.9437	10	Dunn (2013)
Physeter macrocephalus	Caribbean Sea	23	2	2001	-77.3285	25.9057	6	Dunn (2013)
Physeter macrocephalus	Caribbean Sea	2	3	2001	-67.9833	18.0166	2	Swartz et al. (2002)
Physeter macrocephalus	Caribbean Sea	2	3	2001	-78.4833	26.05	1	Swartz et al. (2002)
Physeter macrocephalus	Caribbean Sea	11	3	2001	-77.47	25.9482	7	Dunn (2013)
Physeter macrocephalus	Caribbean Sea	24	3	2001	-77.3765	25.9279	8	Dunn (2013)
Physeter macrocephalus	Caribbean Sea	13	4	2001	-77.411	25.9342	5	Dunn (2013)
Physeter macrocephalus	Caribbean Sea	4	6	2001	-77.3211	25.9034	8	Dunn (2013)
Physeter macrocephalus	Caribbean Sea	13	6	2001	-77.9063	25.3939	1	Dunn (2013)
Physeter macrocephalus	Caribbean Sea	13	10	2001	-77.4244	25.9592	1	Dunn (2013)
Physeter macrocephalus	Caribbean Sea	20	11	2001	-77.4338	25.9755	2	Dunn (2013)
Physeter macrocephalus	Caribbean Sea	20	11	2001	-77.4241	25.9514	1	Dunn (2013)
Physeter macrocephalus	Caribbean Sea	20	11	2001	-77.4201	25.9606	1	Dunn (2013)
Physeter macrocephalus	Caribbean Sea	28	12	2001	-77.4518	25.9746	5	Dunn (2013)
Physeter macrocephalus	Caribbean Sea	19	1	2002	-77.4139	25.9412	8	Dunn (2013)
Physeter macrocephalus	Caribbean Sea	20	1	2002	-77.4131	25.9479	7	Dunn (2013)
Physeter macrocephalus	Caribbean Sea	20	1	2002	-77.4551	25.9826	2	Dunn (2013)
Physeter macrocephalus	Caribbean Sea	20	1	2002	-77.3384	25.9016	8	Dunn (2013)
Physeter macrocephalus	Caribbean Sea	2	2	2002	-77.5967	26.0579	8	Dunn (2013)
Physeter macrocephalus	Caribbean Sea	6	2	2002	-77.4327	25.9562	1	Dunn (2013)
Physeter macrocephalus	Caribbean Sea	6	2	2002	-77.4386	25.9614	1	Dunn (2013)
Physeter macrocephalus	Caribbean Sea	8	3	2002	-77.2684	25.8292	4	Dunn (2013)
Physeter macrocephalus	Caribbean Sea	9	3	2002	-77.3541	25.887	3	Dunn (2013)
Physeter macrocephalus	Caribbean Sea	22	3	2002	-83.161	21.4846	1	Whitt et al. (2011)
Physeter macrocephalus	Caribbean Sea	7	6	2002	-77.3743	25.8939	8	Dunn (2013)
Physeter macrocephalus	Caribbean Sea	8	6	2002	-77.4215	25.9553	8	Dunn (2013)
Physeter macrocephalus	Caribbean Sea	10	6	2002	-77.4773	25.9859	8	Dunn (2013)
Physeter macrocephalus	Caribbean Sea	25	6	2002	-77.5375	26.03	2	Dunn (2013)
Physeter macrocephalus	Caribbean Sea	5	7	2002	-77.2756	25.8938	3	Dunn (2013)
Physeter macrocephalus	Caribbean Sea	6	7	2002	-77.473	25.9882	3	Dunn (2013)
Physeter macrocephalus	Caribbean Sea	12	7	2002	-77.2927	25.8988	2	Dunn (2013)
Physeter macrocephalus	Caribbean Sea	25	8	2002	-75.8333	23.6667	1	Dunn (2013)
Physeter macrocephalus	Caribbean Sea	25	8	2002	-76.5167	24.8517	1	Dunn (2013)
Physeter macrocephalus	Caribbean Sea	22	1	2003	-77.3733	25.9391	1	Dunn (2013)
Physeter macrocephalus	Caribbean Sea	5	6	2003	-77.4344	25.9589	1	Dunn (2013)
Physeter macrocephalus	Caribbean Sea	10	6	2003	-77.4083	25.9704	6	Dunn (2013)
Physeter macrocephalus	Caribbean Sea	10	6	2003	-77.3318	25.915	3	Dunn (2013)
Physeter macrocephalus	Caribbean Sea	22	6	2003	-77.5307	26.0124	6	Dunn (2013)
Physeter macrocephalus	Caribbean Sea	20	7	2003	-77.3774	25.9427	2	Dunn (2013)
Physeter macrocephalus	Caribbean Sea	22	7	2003	-77.3909	25.9176	4	Dunn (2013)
Physeter macrocephalus	Caribbean Sea	28	7	2003	-77.3295	25.9105	2	Dunn (2013)
Physeter macrocephalus	Caribbean Sea	30	7	2003	-77.5464	26.0276	5	Dunn (2013)
Physeter macrocephalus	Caribbean Sea	11	2	2004	-77.5654	26.0344	18	Dunn (2013)
Physeter macrocephalus	Caribbean Sea	11	3	2004	-77.5032	26.0133	5	Dunn (2013)
Physeter macrocephalus	Caribbean Sea	28	3	2004	-77.4313	25.958	8	Dunn (2013)
Physeter macrocephalus	Caribbean Sea	NA	4	2004	-62.2	12.1	1	Yoshida et al. (2010)
Physeter macrocephalus	Caribbean Sea	NA	4	2004	-61.5	12.8	1	Yoshida et al. (2010)
Physeter macrocephalus	Caribbean Sea	NA	4	2004	-62	14.6	1	Yoshida et al. (2010)
Physeter macrocephalus	Caribbean Sea	NA	4	2004	-61	14.2	1	Yoshida et al. (2010)
Physeter macrocephalus	Caribbean Sea	NA	4	2004	-60.7	14.4	1	Yoshida et al. (2010)
Physeter macrocephalus	Caribbean Sea	26	5	2004	-77.4368	25.9658	1	Dunn (2013)
Physeter macrocephalus	Caribbean Sea	6	6	2004	-77.5089	26.0119	9	Dunn (2013)
Physeter macrocephalus	Caribbean Sea	19	6	2004	-77.4113	25.937	10	Dunn (2013)
Physeter macrocephalus	Caribbean Sea	20	6	2004	-77.2835	25.894	5	Dunn (2013)
Physeter macrocephalus	Caribbean Sea	20	6	2004	-77.258	25.8367	11	Dunn (2013)
Physeter macrocephalus	Caribbean Sea	14	7	2004	-77.3743	25.9137	7	Dunn (2013)
Physeter macrocephalus	Caribbean Sea	14	7	2004	-77.4246	25.9427	7	Dunn (2013)
Physeter macrocephalus	Caribbean Sea	15	7	2004	-77.4463	25.9581	6	Dunn (2013)
Physeter macrocephalus	Caribbean Sea	28	7	2004	-77.33	25.9048	6	Dunn (2013)
Physeter macrocephalus	Caribbean Sea	23	8	2004	-77.3655	25.9366	9	Dunn (2013)
Physeter macrocephalus	Caribbean Sea	24	8	2004	-77.4221	25.9561	12	Dunn (2013)
Physeter macrocephalus	Caribbean Sea	13	12	2005	-77.4115	25.956	1	Dunn (2013)
Physeter macrocephalus	Caribbean Sea	13	2	2005	-77.3561	25.9294	2	Dunn (2013)
Physeter macrocephalus	Caribbean Sea	13	2	2005	-77.278	25.8839	6	Dunn (2013)
Physeter macrocephalus	Caribbean Sea	14	3	2005	-77.3618	25.9207	10	Dunn (2013)
Physeter macrocephalus	Caribbean Sea	4	4	2005	-77.2814	25.897	2	Dunn (2013)
Physeter macrocephalus	Caribbean Sea	16	4	2005	-61.605	16.72	2	Hyrenbanch and Whitehead (2013)
Physeter macrocephalus	Caribbean Sea	21	5	2005	-77.4646	25.9747	2	Dunn (2013)
Physeter macrocephalus	Caribbean Sea	16	6	2005	-77.399	25.9589	5	Dunn (2013)
Physeter macrocephalus	Caribbean Sea	16	6	2005	-77.399	25.9589	5	Dunn (2013)
Physeter macrocephalus	Caribbean Sea	29	6	2005	-77.5793	26.0479	5	Dunn (2013)
Physeter macrocephalus	Caribbean Sea	30	6	2005	-77.116	25.3478	1	Dunn (2013)
Physeter macrocephalus	Caribbean Sea	18	7	2005	-77.0345	25.7736	3	Dunn (2013)
Physeter macrocephalus	Caribbean Sea	28	7	2005	-61.8468	12.1558	4	Romero et al. (2002)
Physeter macrocephalus	Caribbean Sea	28	7	2005	-61.8298	12.1558	3	Romero et al. (2002)
Physeter macrocephalus	Caribbean Sea	28	7	2005	-61.8262	12.1591	4	Romero et al. (2002)
Physeter macrocephalus	Caribbean Sea	18	9	2005	-75.1393	19.8766	1	Whitt et al. (2011)
Physeter macrocephalus	Caribbean Sea	23	9	2005	-77.4239	25.9001	1	Dunn (2013)
Physeter macrocephalus	Caribbean Sea	21	3	2006	-63.279	17.214	1	Boisseau (2014)
Physeter macrocephalus	Caribbean Sea	21	3	2006	-63.321	17.231	1	Boisseau (2014)
Physeter macrocephalus	Caribbean Sea	21	3	2006	-63.309	17.223	1	Boisseau (2014)
Physeter macrocephalus	Caribbean Sea	21	3	2006	-63.295	17.227	1	Boisseau (2014)
Physeter macrocephalus	Caribbean Sea	21	3	2006	-63.28	17.223	2	Boisseau (2014)
Physeter macrocephalus	Caribbean Sea	21	3	2006	-63.27	17.214	1	Boisseau (2014)
Physeter macrocephalus	Caribbean Sea	21	3	2006	-63.325	17.217	1	Boisseau (2014)
Physeter macrocephalus	Caribbean Sea	24	3	2006	-63.883	17.342	1	Boisseau (2014)
Physeter macrocephalus	Caribbean Sea	24	3	2006	-63.841	17.328	2	Boisseau (2014)
Physeter macrocephalus	Caribbean Sea	24	3	2006	-63.864	17.347	1	Boisseau (2014)
Physeter macrocephalus	Caribbean Sea	24	3	2006	-63.843	17.331	3	Boisseau (2014)
Physeter macrocephalus	Caribbean Sea	24	3	2006	-63.878	17.35	1	Boisseau (2014)
Physeter macrocephalus	Caribbean Sea	24	3	2006	-63.87	17.376	1	Boisseau (2014)
Physeter macrocephalus	Caribbean Sea	2	8	2006	-77.2702	25.8738	12	Dunn (2013)
Physeter macrocephalus	Caribbean Sea	3	8	2006	-77.3661	25.9191	8	Dunn (2013)
Physeter macrocephalus	Caribbean Sea	30	1	2007	-77.4198	25.9601	1	Dunn (2013)
Physeter macrocephalus	Caribbean Sea	9	2	2007	-77.4059	25.9602	7	Dunn (2013)
Physeter macrocephalus	Caribbean Sea	4	4	2007	-77.3021	25.8814	1	Dunn (2013)
Physeter macrocephalus	Caribbean Sea	4	4	2007	-77.4264	25.9605	2	Dunn (2013)
Physeter macrocephalus	Caribbean Sea	22	6	2007	-77.4064	25.9519	8	Dunn (2013)
Physeter macrocephalus	Caribbean Sea	10	7	2007	-77.472	25.9951	3	Dunn (2013)
Physeter macrocephalus	Caribbean Sea	11	7	2007	-77.5265	26.0279	14	Dunn (2013)
Physeter macrocephalus	Caribbean Sea	12	7	2007	-77.4673	25.9933	9	Dunn (2013)
Physeter macrocephalus	Caribbean Sea	20	12	2007	-62.2833	16.7333	NA	Weir et al. (2011)
Physeter macrocephalus	Caribbean Sea	11	1	2008	-77.4472	25.9745	5	Dunn (2013)
Physeter macrocephalus	Caribbean Sea	5	2	2008	-61.0759	16.1774	NA	van Canneyt (2018)
Physeter macrocephalus	Caribbean Sea	5	2	2008	-61.888	16.2996	NA	van Canneyt (2018)
Physeter macrocephalus	Caribbean Sea	6	2	2008	-62.5625	15.9573	NA	van Canneyt (2018)
Physeter macrocephalus	Caribbean Sea	17	2	2008	-60.6671	14.239	NA	van Canneyt (2018)
Physeter macrocephalus	Caribbean Sea	17	2	2008	-61.4949	15.3986	NA	van Canneyt (2018)
Physeter macrocephalus	Caribbean Sea	18	2	2008	-61.3065	15.7344	NA	van Canneyt (2018)
Physeter macrocephalus	Caribbean Sea	23	2	2008	-63.5917	17.958	NA	van Canneyt (2018)
Physeter macrocephalus	Caribbean Sea	24	2	2008	-61.5111	15.4144	NA	van Canneyt (2018)
Physeter macrocephalus	Caribbean Sea	25	2	2008	-61.8419	16.5959	NA	van Canneyt (2018)
Physeter macrocephalus	Caribbean Sea	25	2	2008	-61.8438	16.5979	NA	van Canneyt (2018)
Physeter macrocephalus	Caribbean Sea	25	2	2008	-61.8183	15.7868	NA	van Canneyt (2018)
Physeter macrocephalus	Caribbean Sea	3	3	2008	-61.5066	15.5692	NA	van Canneyt (2018)
Physeter macrocephalus	Caribbean Sea	3	3	2008	-61.4055	15.2055	NA	van Canneyt (2018)
Physeter macrocephalus	Caribbean Sea	29	3	2008	-81.4518	23.1846	1	Whitt et al. (2011)
Physeter macrocephalus	Caribbean Sea	26	9	2008	-77.5474	24.6437	4	Dunn (2013)
Physeter macrocephalus	Caribbean Sea	30	4	2009	-77.3607	25.9168	12	Dunn (2013)
Physeter macrocephalus	Caribbean Sea	1	5	2009	-77.333	25.8851	4	Dunn (2013)
Physeter macrocephalus	Caribbean Sea	13	5	2009	-77.6259	24.3284	3	Dunn (2013)
Physeter macrocephalus	Caribbean Sea	31	5	2009	-77.2195	25.7755	15	Dunn (2013)
Physeter macrocephalus	Caribbean Sea	31	5	2009	-77.2896	25.7672	15	Dunn (2013)
Physeter macrocephalus	Caribbean Sea	1	6	2009	-78.3407	26.3278	11	Dunn (2013)
Physeter macrocephalus	Caribbean Sea	1	6	2009	-78.3469	26.3092	11	Dunn (2013)
Physeter macrocephalus	Caribbean Sea	1	6	2009	-78.3339	26.3457	11	Dunn (2013)
Physeter macrocephalus	Caribbean Sea	9	7	2009	-77.4546	25.9699	1	Dunn (2013)
Physeter macrocephalus	Caribbean Sea	10	7	2009	-77.335	25.8971	7	Dunn (2013)
Physeter macrocephalus	Caribbean Sea	11	7	2009	-77.3098	25.8875	3	Dunn (2013)
Physeter macrocephalus	Caribbean Sea	26	7	2009	-77.4142	25.9626	3	Dunn (2013)
Physeter macrocephalus	Caribbean Sea	27	7	2009	-77.4412	25.9678	4	Dunn (2013)
Physeter macrocephalus	Caribbean Sea	9	9	2009	-68.8472	18.2583	4	Vázquez-Castán et al. (2012)
Physeter macrocephalus	Caribbean Sea	15	9	2009	-76.7834	24.7023	1	Dunn (2013)
Physeter macrocephalus	Caribbean Sea	18	9	2009	-76.5686	24.8781	2	Dunn (2013)
Physeter macrocephalus	Caribbean Sea	20	9	2009	-76.5416	24.8597	3	Dunn (2013)
Physeter macrocephalus	Caribbean Sea	5	10	2009	-76.5415	24.8591	3	Dunn (2013)
Physeter macrocephalus	Caribbean Sea	5	10	2009	-76.4943	24.8498	3	Dunn (2013)
Physeter macrocephalus	Caribbean Sea	25	10	2009	-77.4614	24.344	4	Dunn (2013)
Physeter macrocephalus	Caribbean Sea	30	10	2009	-77.5026	24.6733	5	Dunn (2013)
Physeter macrocephalus	Caribbean Sea	31	10	2009	-77.5497	24.7136	4	Dunn (2013)
Physeter macrocephalus	Caribbean Sea	27	4	2010	-77.5272	24.7562	5	Dunn (2013)
Physeter macrocephalus	Caribbean Sea	3	5	2010	-77.4983	24.5988	3	Dunn (2013)
Physeter macrocephalus	Caribbean Sea	5	5	2010	-77.4357	24.3809	1	Dunn (2013)
Physeter macrocephalus	Caribbean Sea	5	5	2010	-77.293	24.377	2	Dunn (2013)
Physeter macrocephalus	Caribbean Sea	8	5	2010	-77.5439	24.5233	2	Dunn (2013)
Physeter macrocephalus	Caribbean Sea	9	5	2010	-77.6207	24.6033	6	Dunn (2013)
Physeter macrocephalus	Caribbean Sea	9	5	2010	-77.6248	24.5065	6	Dunn (2013)
Physeter macrocephalus	Caribbean Sea	3	7	2010	-77.4167	25.9284	12	Dunn (2013)
Physeter macrocephalus	Caribbean Sea	5	7	2010	-77.4107	25.9531	8	Dunn (2013)
Physeter macrocephalus	Caribbean Sea	6	7	2010	-77.396	25.9374	5	Dunn (2013)
Physeter macrocephalus	Caribbean Sea	27	1	2011	-77.4045	25.9533	6	Dunn (2013)
Physeter macrocephalus	Caribbean Sea	15	2	2011	-77.2743	25.8895	6	Dunn (2013)
Physeter macrocephalus	Caribbean Sea	4	5	2011	-77.4737	24.7495	1	Dunn (2013)
Physeter macrocephalus	Caribbean Sea	5	5	2011	-77.519	24.5475	9	Dunn (2013)
Physeter macrocephalus	Caribbean Sea	6	5	2011	-77.449	24.629	9	Dunn (2013)
Physeter macrocephalus	Caribbean Sea	6	5	2011	-77.4774	24.6277	9	Dunn (2013)
Physeter macrocephalus	Caribbean Sea	6	5	2011	-77.4861	24.6322	9	Dunn (2013)
Physeter macrocephalus	Caribbean Sea	10	5	2011	-77.3116	25.8761	1	Dunn (2013)
Physeter macrocephalus	Caribbean Sea	6	6	2011	-78.1201	26.4356	10	Dunn (2013)
Physeter macrocephalus	Caribbean Sea	16	6	2011	-77.5506	24.6719	3	Dunn (2013)
Physeter macrocephalus	Caribbean Sea	16	6	2011	-77.6339	24.5092	2	Dunn (2013)
Physeter macrocephalus	Caribbean Sea	22	6	2011	-77.4154	24.5781	1	Dunn (2013)
Physeter macrocephalus	Caribbean Sea	22	6	2011	-77.5771	24.7761	3	Dunn (2013)
Physeter macrocephalus	Caribbean Sea	23	6	2011	-77.1399	25.2108	2	Dunn (2013)
Physeter macrocephalus	Caribbean Sea	23	6	2011	-77.0849	25.2555	1	Dunn (2013)
Physeter macrocephalus	Caribbean Sea	24	6	2011	-76.9408	25.4441	1	Dunn (2013)
Physeter macrocephalus	Caribbean Sea	26	6	2011	-77.3013	25.9035	2	Dunn (2013)
Physeter macrocephalus	Caribbean Sea	2	7	2011	-77.4152	25.9536	1	Dunn (2013)
Physeter macrocephalus	Caribbean Sea	19	7	2011	-77.4077	25.9534	5	Dunn (2013)
Physeter macrocephalus	Caribbean Sea	20	7	2011	-77.5115	26.0094	14	Dunn (2013)
Physeter macrocephalus	Caribbean Sea	21	7	2011	-77.2683	25.8742	8	Dunn (2013)
Physeter macrocephalus	Caribbean Sea	26	7	2011	-77.6983	26.1366	5	Dunn (2013)
Physeter macrocephalus	Caribbean Sea	8	9	2017	-61.845	16.2524	NA	van Canneyt (2018)
Physeter macrocephalus	Caribbean Sea	8	9	2017	-61.1654	14.6252	NA	van Canneyt (2018)
Physeter macrocephalus	Caribbean Sea	9	9	2017	-61.4306	14.9671	NA	van Canneyt (2018)
Physeter macrocephalus	Caribbean Sea	9	9	2017	-61.4331	14.9649	NA	van Canneyt (2018)
Physeter macrocephalus	Caribbean Sea	9	9	2017	-61.4383	14.96	NA	van Canneyt (2018)
Physeter macrocephalus	Caribbean Sea	11	10	2017	-60.8738	14.8979	NA	van Canneyt (2018)
Physeter macrocephalus	Caribbean Sea	25	10	2017	-63.5949	17.1255	NA	van Canneyt (2018)
Physeter macrocephalus	Caribbean Sea	25	10	2017	-63.612	17.114	NA	van Canneyt (2018)
Physeter macrocephalus	Caribbean Sea	25	10	2017	-63.6136	17.1116	NA	van Canneyt (2018)
Physeter macrocephalus	Caribbean Sea	25	10	2017	-60.9412	14.3277	NA	van Canneyt (2018)

## Sheet: Pygmy sperm whale
Species	Locality	Day	Month	Year	Longitude	Latitude	Group size	Reference
Kogia breviceps	Gulf of Mexico	3	5	1992	-89.7015	27.8065	1	Garrison (2013)
Kogia breviceps	Gulf of Mexico	12	5	1992	-88.0385	27.9858	1	Garrison (2013)
Kogia breviceps	Gulf of Mexico	14	5	1992	-89.0005	28.9742	1	Garrison (2013)
Kogia breviceps	Gulf of Mexico	24	5	1992	-94.59	27.57	1	Garrison (2013)
Kogia breviceps	Gulf of Mexico	5	6	1992	-90.0062	27.7155	1	Garrison (2013)
Kogia breviceps	Gulf of Mexico	14	2	1993	-88.8491	27.8933	1	Jefferson (1995)
Kogia breviceps	Gulf of Mexico	14	2	1993	-88.8416	27.8166	1	Jefferson (1995)
Kogia breviceps	Gulf of Mexico	8	2	1993	-93.2985	27.4373	1	NOAA (1993)
Kogia breviceps	Gulf of Mexico	30	5	1993	-94	26.4333	1	NOAA (1993)
Kogia breviceps	Gulf of Mexico	13	6	1993	-84.9666	27.2666	2	NOAA (1993)
Kogia breviceps	Gulf of Mexico	2	9	1993	-92.1705	26.3802	2	Jefferson (1995)
Kogia breviceps	Gulf of Mexico	4	5	1994	-87.4166	26.0333	1	NOAA (1994)
Kogia breviceps	Gulf of Mexico	11	5	1994	-93.9	26	1	NOAA (1994)
Kogia breviceps	Gulf of Mexico	22	5	1996	-92.0005	27.0753	1	Garrison (2013)
Kogia breviceps	Gulf of Mexico	22	5	1996	-92.0028	27.1412	1	Garrison (2013)
Kogia breviceps	Gulf of Mexico	22	5	1996	-91.9998	27.061	1	Garrison (2013)
Kogia breviceps	Gulf of Mexico	4	6	1996	-86.6137	29.3062	2	Garrison (2013)
Kogia breviceps	Gulf of Mexico	22	5	2000	-90.05	27.7	1	NOAA (2000)
Kogia breviceps	Southeast U.S. Continental Shelf	21	6	1998	-77.3991	25.9883	5	Dunn (2013)
Kogia breviceps	Southeast U.S. Continental Shelf	17	4	2000	-77.2839	25.9049	2	Dunn (2013)
Kogia breviceps	Southeast U.S. Continental Shelf	26	2	2002	-77.3991	25.9718	1	Dunn (2013)
Kogia breviceps	Southeast U.S. Continental Shelf	23	2	2011	-77.3282	25.9245	2	Dunn (2013)
Kogia breviceps	Caribbean Sea	9	1	1994	-61.1369	14.5381	4	Lanfredi y Notarbartolo di Sciara
Kogia breviceps	Caribbean Sea	28	3	1997	-77.0541	25.7337	2	Dunn (2013)
Kogia breviceps	Caribbean Sea	7	2	1999	-77.3564	25.902	1	Dunn (2013)
Kogia breviceps	Caribbean Sea	12	5	1999	-77.3642	25.8898	1	Dunn (2013)
Kogia breviceps	Caribbean Sea	8	2	2000	-61.7984	12.101	2	Boisseau (2014)
Kogia breviceps	Caribbean Sea	22	3	2000	-77.3162	25.8761	1	Dunn (2013)
Kogia breviceps	Caribbean Sea	10	5	2000	-77.3491	25.8769	1	Dunn (2013)
Kogia breviceps	Caribbean Sea	15	8	2000	-77.2747	25.8916	2	Dunn (2013)
Kogia breviceps	Caribbean Sea	15	8	2000	-77.284	25.8989	2	Dunn (2013)
Kogia breviceps	Caribbean Sea	27	3	2001	-76.6583	24.5783	1	Dunn (2013)
Kogia breviceps	Caribbean Sea	27	3	2001	-76.6723	24.6101	6	Dunn (2013)
Kogia breviceps	Caribbean Sea	13	10	2003	-77.3992	25.8759	2	Dunn (2013)
Kogia breviceps	Caribbean Sea	14	1	2004	-77.4203	25.956	1	Dunn (2013)
Kogia breviceps	Caribbean Sea	25	6	2005	-77.2855	25.877	2	Dunn (2013)
Kogia breviceps	Caribbean Sea	7	8	2005	-77.45	25.9583	1	Dunn (2013)
Kogia breviceps	Caribbean Sea	27	9	2005	-77.5813	24.3815	1	Dunn (2013)
Kogia breviceps	Caribbean Sea	27	9	2005	-77.5783	24.3835	2	Dunn (2013)
Kogia breviceps	Caribbean Sea	23	10	2006	-77.6011	24.4587	1	Dunn (2013)
Kogia breviceps	Caribbean Sea	23	10	2006	-77.5933	24.453	1	Dunn (2013)
Kogia breviceps	Caribbean Sea	23	10	2006	-77.583	24.4435	1	Dunn (2013)
Kogia breviceps	Caribbean Sea	23	10	2006	-77.6007	24.4589	1	Dunn (2013)
Kogia breviceps	Caribbean Sea	17	1	2007	-77.4051	25.9598	7	Dunn (2013)
Kogia breviceps	Caribbean Sea	26	7	2008	-77.3447	25.9124	4	Dunn (2013)
Kogia breviceps	Caribbean Sea	1	6	2009	-78.3704	26.2948	5	Dunn (2013)
Kogia breviceps	Caribbean Sea	1	6	2009	-78.3503	26.294	5	Dunn (2013)
Kogia breviceps	Caribbean Sea	20	1	2010	-77.2961	25.8908	1	Dunn (2013)
Kogia breviceps	Caribbean Sea	28	7	2010	-77.6106	26.0676	1	Dunn (2013)
Kogia breviceps	Caribbean Sea	13	5	2011	-77.2835	25.8927	2	Dunn (2013)
Kogia breviceps	Caribbean Sea	21	5	2011	-77.2715	25.8932	2	Dunn (2013)

## Sheet: Dwarf sperm whale
Species	Locality	Day	Month	Year	Longitude	Latitude	Group size	Reference
Kogia sima	Gulf of Mexico	17	5	1990	-87.9833	27.0222	NA	NOAA (1990)
Kogia sima	Gulf of Mexico	17	5	1990	-88.9916	27.0083	NA	NOAA (1990)
Kogia sima	Gulf of Mexico	21	5	1990	-93.4361	27.5527	NA	NOAA (1990)
Kogia sima	Gulf of Mexico	23	5	1990	-87.7666	27.775	NA	NOAA (1990)
Kogia sima	Gulf of Mexico	24	5	1990	-88.2027	28.9944	NA	NOAA (1990)
Kogia sima	Gulf of Mexico	24	5	1990	-88.3527	28.9166	NA	NOAA (1990)
Kogia sima	Gulf of Mexico	25	4	1992	-86.009	25.3538	2	Garrison (2013)
Kogia sima	Gulf of Mexico	25	4	1992	-86.0043	25.4718	2	Garrison (2013)
Kogia sima	Gulf of Mexico	9	5	1992	-86.0673	28.2207	2	Garrison (2013)
Kogia sima	Gulf of Mexico	9	5	1992	-86.0368	28.5182	2	Garrison (2013)
Kogia sima	Gulf of Mexico	14	5	1992	-88.9945	27.7577	2	Garrison (2013)
Kogia sima	Gulf of Mexico	15	5	1992	-88.5435	28.9555	2	Garrison (2013)
Kogia sima	Gulf of Mexico	15	5	1992	-89.004	28.7422	1	Garrison (2013)
Kogia sima	Gulf of Mexico	15	5	1992	-89.6455	28.4263	1	Garrison (2013)
Kogia sima	Gulf of Mexico	15	5	1992	-88.6073	28.9253	1	Garrison (2013)
Kogia sima	Gulf of Mexico	15	5	1992	-88.9445	28.7647	2	Garrison (2013)
Kogia sima	Gulf of Mexico	23	5	1992	-96.1122	26.726	2	Garrison (2013)
Kogia sima	Gulf of Mexico	24	5	1992	-94.4938	27.6977	1	Garrison (2013)
Kogia sima	Gulf of Mexico	24	5	1992	-94.8117	27.8048	2	Garrison (2013)
Kogia sima	Gulf of Mexico	24	5	1992	-94.883	27.791	2	Garrison (2013)
Kogia sima	Gulf of Mexico	5	6	1992	-90.042	26.82	7	Garrison (2013)
Kogia sima	Gulf of Mexico	5	6	1992	-90.0372	26.8105	4	Garrison (2013)
Kogia sima	Gulf of Mexico	5	6	1992	-89.9905	27.8868	1	Garrison (2013)
Kogia sima	Gulf of Mexico	6	6	1992	-88.9973	27.153	1	Garrison (2013)
Kogia sima	Gulf of Mexico	11	5	1993	-90.8666	26.65	1	NOAA (1993)
Kogia sima	Gulf of Mexico	15	5	1993	-88.0666	29.1	3	NOAA (1993)
Kogia sima	Gulf of Mexico	15	5	1993	-88.0666	29.0666	6	NOAA (1993)
Kogia sima	Gulf of Mexico	16	5	1993	-87.0833	28.6666	2	NOAA (1993)
Kogia sima	Gulf of Mexico	16	5	1993	-87.0833	28.75	4	NOAA (1993)
Kogia sima	Gulf of Mexico	16	5	1993	-87.0666	28.7666	1	NOAA (1993)
Kogia sima	Gulf of Mexico	16	5	1993	-87.1	28.9166	2	NOAA (1993)
Kogia sima	Gulf of Mexico	30	5	1993	-94	26.0333	4	NOAA (1993)
Kogia sima	Gulf of Mexico	30	5	1993	-94	27.1	1	NOAA (1993)
Kogia sima	Gulf of Mexico	30	5	1993	-94	26.2666	1	NOAA (1993)
Kogia sima	Gulf of Mexico	9	6	1993	-88.9833	28.0333	2	NOAA (1993)
Kogia sima	Gulf of Mexico	13	6	1993	-85	27.1166	8	NOAA (1993)
Kogia sima	Gulf of Mexico	14	6	1993	-86.9	28.9666	2	NOAA (1993)
Kogia sima	Gulf of Mexico	14	6	1993	-87.0166	29.2333	1	NOAA (1993)
Kogia sima	Gulf of Mexico	29	8	1993	-88.8336	28.7736	4	Jefferson (1995)
Kogia sima	Gulf of Mexico	3	9	1993	-92.843	26.7877	7	Jefferson (1995)
Kogia sima	Gulf of Mexico	22	4	1994	-87.5	28.2833	4	NOAA (1994)
Kogia sima	Gulf of Mexico	22	4	1994	-87.5	28.2166	1	NOAA (1994)
Kogia sima	Gulf of Mexico	4	5	1994	-87.85	26	1	NOAA (1994)
Kogia sima	Gulf of Mexico	9	5	1994	-92.0166	26.2833	3	NOAA (1994)
Kogia sima	Gulf of Mexico	17	5	1994	-84.0666	24.7666	1	NOAA (1994)
Kogia sima	Gulf of Mexico	17	5	1994	-84.0666	24.7333	1	NOAA (1994)
Kogia sima	Gulf of Mexico	6	6	1994	-91.2	27.0333	1	NOAA (1994)
Kogia sima	Gulf of Mexico	6	6	1994	-91.2166	26.9833	1	NOAA (1994)
Kogia sima	Gulf of Mexico	4	5	1996	-91.969	27.7555	4	Garrison (2013)
Kogia sima	Gulf of Mexico	22	5	1996	-91.9565	27.6322	4	Garrison (2013)
Kogia sima	Gulf of Mexico	22	5	1996	-91.9558	27.6297	6	Garrison (2013)
Kogia sima	Gulf of Mexico	22	5	1996	-89.1583	28.5085	2	Garrison (2013)
Kogia sima	Gulf of Mexico	27	4	2000	-87.0166	26.2333	1	NOAA (2000)
Kogia sima	Gulf of Mexico	21	5	2000	-88.95	26.6833	1	NOAA (2000)
Kogia sima	Gulf of Mexico	21	5	2000	-88.9333	26.55	3	NOAA (2000)
Kogia sima	Gulf of Mexico	28	5	2000	-91.0833	27.5666	2	NOAA (2000)
Kogia sima	Gulf of Mexico	30	5	2003	-86.8228	27.0129	2	Holts et al. (2014)
Kogia sima	Southeast U.S. Continental Shelf	22	1	1992	-76.2128	32.4328	4	Garrison (2013)
Kogia sima	Southeast U.S. Continental Shelf	4	2	1992	-77.065	31.594	3	Garrison (2013)
Kogia sima	Southeast U.S. Continental Shelf	14	8	1996	-76.959	26.4853	1	Dunn (2013)
Kogia sima	Southeast U.S. Continental Shelf	8	1	1997	-77.2892	25.9073	3	Dunn (2013)
Kogia sima	Southeast U.S. Continental Shelf	12	3	1997	-77.3897	25.9762	1	Dunn (2013)
Kogia sima	Southeast U.S. Continental Shelf	3	8	1997	-77.4794	26.0279	8	Dunn (2013)
Kogia sima	Southeast U.S. Continental Shelf	19	5	1998	-76.9194	26.6038	2	Dunn (2013)
Kogia sima	Southeast U.S. Continental Shelf	19	5	1998	-76.9644	26.6584	3	Dunn (2013)
Kogia sima	Southeast U.S. Continental Shelf	20	5	1998	-76.8914	26.5268	1	Dunn (2013)
Kogia sima	Southeast U.S. Continental Shelf	21	5	1998	-76.9034	26.5999	5	Dunn (2013)
Kogia sima	Southeast U.S. Continental Shelf	13	6	1998	-77.332	25.9278	3	Dunn (2013)
Kogia sima	Southeast U.S. Continental Shelf	18	6	1998	-76.9248	26.5104	6	Dunn (2013)
Kogia sima	Southeast U.S. Continental Shelf	18	6	1998	-77.3197	25.9137	2	Dunn (2013)
Kogia sima	Southeast U.S. Continental Shelf	24	6	1998	-77.4912	26.0173	3	Dunn (2013)
Kogia sima	Southeast U.S. Continental Shelf	25	6	1998	-77.3962	25.9776	4	Dunn (2013)
Kogia sima	Southeast U.S. Continental Shelf	5	7	1998	-77.4005	25.9811	3	Dunn (2013)
Kogia sima	Southeast U.S. Continental Shelf	7	7	1998	-77.3247	25.9285	1	Dunn (2013)
Kogia sima	Southeast U.S. Continental Shelf	4	8	1998	-77.2771	25.9021	3	Dunn (2013)
Kogia sima	Southeast U.S. Continental Shelf	4	8	1998	-77.2711	25.897	4	Dunn (2013)
Kogia sima	Southeast U.S. Continental Shelf	5	8	1998	-77.3081	25.912	1	Dunn (2013)
Kogia sima	Southeast U.S. Continental Shelf	14	8	1998	-78.1515	30.5103	2	Garrison (2013)
Kogia sima	Southeast U.S. Continental Shelf	15	8	1998	-76.9533	26.4921	2	Dunn (2013)
Kogia sima	Southeast U.S. Continental Shelf	24	4	1999	-77.3022	25.9058	2	Dunn (2013)
Kogia sima	Southeast U.S. Continental Shelf	12	5	1999	-77.3419	25.9286	15	Dunn (2013)
Kogia sima	Southeast U.S. Continental Shelf	18	5	1999	-77.3096	25.9101	6	Dunn (2013)
Kogia sima	Southeast U.S. Continental Shelf	19	5	1999	-77.3091	25.9099	3	Dunn (2013)
Kogia sima	Southeast U.S. Continental Shelf	20	5	1999	-77.281	25.9049	4	Dunn (2013)
Kogia sima	Southeast U.S. Continental Shelf	26	5	1999	-77.5537	26.0787	6	Dunn (2006)
Kogia sima	Southeast U.S. Continental Shelf	24	6	1999	-77.4815	26.0225	3	Dunn (2013)
Kogia sima	Southeast U.S. Continental Shelf	8	7	1999	-77.3382	25.936	2	Dunn (2013)
Kogia sima	Southeast U.S. Continental Shelf	21	7	1999	-76.9218	26.6157	5	Dunn (2013)
Kogia sima	Southeast U.S. Continental Shelf	21	7	1999	-77.3896	25.9812	2	Dunn (2013)
Kogia sima	Southeast U.S. Continental Shelf	21	7	1999	-77.3866	25.9783	1	Dunn (2013)
Kogia sima	Southeast U.S. Continental Shelf	8	12	1999	-77.3803	25.9817	6	Dunn (2013)
Kogia sima	Southeast U.S. Continental Shelf	1	2	2000	-77.2967	25.9056	4	Dunn (2013)
Kogia sima	Southeast U.S. Continental Shelf	20	2	2000	-77.2725	25.8973	6	Dunn (2013)
Kogia sima	Southeast U.S. Continental Shelf	21	3	2000	-77.3788	25.951	3	Dunn (2013)
Kogia sima	Southeast U.S. Continental Shelf	17	4	2000	-77.286	25.9124	2	Dunn (2013)
Kogia sima	Southeast U.S. Continental Shelf	17	4	2000	-77.2865	25.9038	2	Dunn (2013)
Kogia sima	Southeast U.S. Continental Shelf	8	7	2000	-77.3761	25.9728	1	Dunn (2013)
Kogia sima	Southeast U.S. Continental Shelf	9	7	2000	-77.3673	25.9488	2	Dunn (2013)
Kogia sima	Southeast U.S. Continental Shelf	9	7	2000	-77.2844	25.9065	2	Dunn (2013)
Kogia sima	Southeast U.S. Continental Shelf	11	7	2000	-77.3605	25.9662	3	Dunn (2013)
Kogia sima	Southeast U.S. Continental Shelf	11	7	2000	-77.3786	25.9706	5	Dunn (2013)
Kogia sima	Southeast U.S. Continental Shelf	11	7	2000	-77.3619	25.9682	1	Dunn (2013)
Kogia sima	Southeast U.S. Continental Shelf	8	8	2000	-77.2849	25.9007	2	Dunn (2013)
Kogia sima	Southeast U.S. Continental Shelf	9	8	2000	-77.3336	25.9275	1	Dunn (2013)
Kogia sima	Southeast U.S. Continental Shelf	10	8	2000	-77.341	25.9474	1	Dunn (2013)
Kogia sima	Southeast U.S. Continental Shelf	10	8	2000	-77.3474	25.9437	5	Dunn (2013)
Kogia sima	Southeast U.S. Continental Shelf	14	8	2000	-77.292	25.9048	1	Dunn (2013)
Kogia sima	Southeast U.S. Continental Shelf	17	1	2001	-77.3768	25.9673	3	Dunn (2013)
Kogia sima	Southeast U.S. Continental Shelf	24	1	2001	-77.2785	25.9037	1	Dunn (2013)
Kogia sima	Southeast U.S. Continental Shelf	2	2	2001	-77.2761	25.9041	8	Dunn (2013)
Kogia sima	Southeast U.S. Continental Shelf	23	2	2001	-77.2715	25.9038	6	Dunn (2013)
Kogia sima	Southeast U.S. Continental Shelf	23	2	2001	-77.2648	25.8967	2	Dunn (2013)
Kogia sima	Southeast U.S. Continental Shelf	24	3	2001	-77.3125	25.9132	2	Dunn (2013)
Kogia sima	Southeast U.S. Continental Shelf	5	4	2001	-77.3311	25.9254	3	Dunn (2013)
Kogia sima	Southeast U.S. Continental Shelf	16	5	2001	-77.3481	25.935	1	Dunn (2013)
Kogia sima	Southeast U.S. Continental Shelf	31	5	2001	-77.3462	25.931	1	Dunn (2013)
Kogia sima	Southeast U.S. Continental Shelf	7	6	2001	-77.3621	25.9538	2	Dunn (2013)
Kogia sima	Southeast U.S. Continental Shelf	21	6	2001	-77.3767	25.9659	2	Dunn (2013)
Kogia sima	Southeast U.S. Continental Shelf	8	10	2001	-77.3731	25.9633	4	Dunn (2013)
Kogia sima	Southeast U.S. Continental Shelf	25	10	2001	-77.3079	25.9136	4	Dunn (2013)
Kogia sima	Southeast U.S. Continental Shelf	17	1	2002	-77.3472	25.9451	1	Dunn (2013)
Kogia sima	Southeast U.S. Continental Shelf	20	1	2002	-77.3496	25.9369	7	Dunn (2013)
Kogia sima	Southeast U.S. Continental Shelf	22	1	2002	-77.37	25.9642	2	Dunn (2013)
Kogia sima	Southeast U.S. Continental Shelf	28	1	2002	-77.2751	25.8964	2	Dunn (2013)
Kogia sima	Southeast U.S. Continental Shelf	2	2	2002	-77.5027	26.0334	1	Dunn (2013)
Kogia sima	Southeast U.S. Continental Shelf	2	2	2002	-77.4779	26.0218	1	Dunn (2013)
Kogia sima	Southeast U.S. Continental Shelf	10	3	2002	-77.4228	25.9807	1	Dunn (2013)
Kogia sima	Southeast U.S. Continental Shelf	15	3	2002	-77.3498	25.9446	12	Dunn (2013)
Kogia sima	Southeast U.S. Continental Shelf	1	6	2002	-77.2787	25.909	3	Dunn (2013)
Kogia sima	Southeast U.S. Continental Shelf	6	6	2002	-77.334	25.9305	1	Dunn (2013)
Kogia sima	Southeast U.S. Continental Shelf	7	6	2002	-77.3781	25.9743	3	Dunn (2013)
Kogia sima	Southeast U.S. Continental Shelf	7	6	2002	-77.3787	25.951	3	Dunn (2013)
Kogia sima	Southeast U.S. Continental Shelf	7	6	2002	-77.4	25.9858	1	Dunn (2013)
Kogia sima	Southeast U.S. Continental Shelf	21	7	2002	-77.509	26.0331	3	Dunn (2013)
Kogia sima	Southeast U.S. Continental Shelf	29	7	2002	-77.4824	26.0239	1	Dunn (2013)
Kogia sima	Southeast U.S. Continental Shelf	12	8	2002	-77.3498	25.9317	5	Dunn (2013)
Kogia sima	Southeast U.S. Continental Shelf	12	8	2002	-77.3205	25.9138	1	Dunn (2013)
Kogia sima	Southeast U.S. Continental Shelf	20	10	2002	-77.3689	25.9572	1	Dunn (2013)
Kogia sima	Southeast U.S. Continental Shelf	20	10	2002	-77.2883	25.9159	2	Dunn (2013)
Kogia sima	Southeast U.S. Continental Shelf	8	2	2003	-77.4011	25.9775	2	Dunn (2013)
Kogia sima	Southeast U.S. Continental Shelf	22	6	2003	-77.3156	25.9134	1	Dunn (2013)
Kogia sima	Southeast U.S. Continental Shelf	24	9	2003	-77.3284	25.9245	1	Dunn (2013)
Kogia sima	Southeast U.S. Continental Shelf	25	9	2003	-77.3549	25.951	1	Dunn (2013)
Kogia sima	Southeast U.S. Continental Shelf	13	10	2003	-77.4102	25.9775	2	Dunn (2013)
Kogia sima	Southeast U.S. Continental Shelf	2	2	2004	-77.4176	25.9866	4	Dunn (2013)
Kogia sima	Southeast U.S. Continental Shelf	26	5	2004	-77.413	25.975	9	Dunn (2013)
Kogia sima	Southeast U.S. Continental Shelf	29	5	2004	-77.3441	25.9324	5	Dunn (2013)
Kogia sima	Southeast U.S. Continental Shelf	2	6	2004	-77.3776	25.9601	3	Dunn (2013)
Kogia sima	Southeast U.S. Continental Shelf	13	6	2004	-77.3722	25.9598	3	Dunn (2013)
Kogia sima	Southeast U.S. Continental Shelf	8	7	2004	-77.307	25.9117	2	Dunn (2013)
Kogia sima	Southeast U.S. Continental Shelf	8	7	2004	-77.3033	25.9088	3	Dunn (2013)
Kogia sima	Southeast U.S. Continental Shelf	22	8	2004	-77.3927	25.9692	1	Dunn (2013)
Kogia sima	Southeast U.S. Continental Shelf	22	8	2004	-77.3125	25.9156	3	Dunn (2013)
Kogia sima	Southeast U.S. Continental Shelf	16	2	2005	-77.3557	25.9586	5	Dunn (2013)
Kogia sima	Southeast U.S. Continental Shelf	16	2	2005	-77.3602	25.9511	5	Dunn (2013)
Kogia sima	Southeast U.S. Continental Shelf	4	4	2005	-77.284	25.9043	1	Dunn (2013)
Kogia sima	Southeast U.S. Continental Shelf	11	4	2005	-77.3539	25.9378	1	Dunn (2013)
Kogia sima	Southeast U.S. Continental Shelf	21	5	2005	-77.2849	25.9102	3	Dunn (2013)
Kogia sima	Southeast U.S. Continental Shelf	13	6	2005	-77.2877	25.9094	2	Dunn (2013)
Kogia sima	Southeast U.S. Continental Shelf	14	7	2005	-77.4784	26.0077	2	Dunn (2013)
Kogia sima	Southeast U.S. Continental Shelf	14	7	2005	-77.4648	25.9997	4	Dunn (2013)
Kogia sima	Southeast U.S. Continental Shelf	3	8	2005	-77.35	25.924	3	Dunn (2013)
Kogia sima	Southeast U.S. Continental Shelf	3	8	2005	-77.323	25.9164	2	Dunn (2013)
Kogia sima	Southeast U.S. Continental Shelf	5	8	2005	-77.3608	25.9401	1	Dunn (2013)
Kogia sima	Southeast U.S. Continental Shelf	7	8	2005	-77.4262	25.9805	2	Dunn (2013)
Kogia sima	Southeast U.S. Continental Shelf	8	8	2005	-77.358	25.941	1	Dunn (2013)
Kogia sima	Southeast U.S. Continental Shelf	1	2	2006	-77.3263	25.9205	3	Dunn (2013)
Kogia sima	Southeast U.S. Continental Shelf	23	10	2006	-77.397	25.9871	5	Dunn (2013)
Kogia sima	Southeast U.S. Continental Shelf	12	11	2007	-77.3796	25.9582	1	Dunn (2013)
Kogia sima	Southeast U.S. Continental Shelf	28	4	2007	-77.2758	25.9001	1	Dunn (2013)
Kogia sima	Southeast U.S. Continental Shelf	28	4	2007	-77.2749	25.9022	3	Dunn (2013)
Kogia sima	Southeast U.S. Continental Shelf	28	4	2007	-77.3033	25.9088	8	Dunn (2013)
Kogia sima	Southeast U.S. Continental Shelf	29	4	2007	-77.3501	25.926	1	Dunn (2013)
Kogia sima	Southeast U.S. Continental Shelf	29	4	2007	-77.339	25.9416	2	Dunn (2013)
Kogia sima	Southeast U.S. Continental Shelf	11	6	2007	-77.3934	25.9641	7	Dunn (2013)
Kogia sima	Southeast U.S. Continental Shelf	22	4	2008	-77.3738	25.9782	4	Dunn (2013)
Kogia sima	Southeast U.S. Continental Shelf	11	7	2008	-77.3552	25.9457	1	Dunn (2013)
Kogia sima	Southeast U.S. Continental Shelf	30	7	2008	-77.3392	25.9268	4	Dunn (2013)
Kogia sima	Southeast U.S. Continental Shelf	20	1	2010	-77.3966	25.9647	7	Dunn (2013)
Kogia sima	Southeast U.S. Continental Shelf	28	5	2010	-77.3709	25.9568	3	Dunn (2013)
Kogia sima	Southeast U.S. Continental Shelf	6	6	2010	-76.8934	26.6327	4	Dunn (2013)
Kogia sima	Southeast U.S. Continental Shelf	7	6	2010	-76.9013	26.64	4	Dunn (2013)
Kogia sima	Southeast U.S. Continental Shelf	13	6	2010	-76.9518	26.4864	3	Dunn (2013)
Kogia sima	Southeast U.S. Continental Shelf	16	6	2010	-76.9444	26.6103	6	Dunn (2013)
Kogia sima	Southeast U.S. Continental Shelf	28	7	2010	-77.5887	26.082	10	Dunn (2013)
Kogia sima	Southeast U.S. Continental Shelf	6	2	2011	-77.5846	26.1098	3	Dunn (2013)
Kogia sima	Southeast U.S. Continental Shelf	14	2	2011	-77.3269	25.9176	1	Dunn (2013)
Kogia sima	Southeast U.S. Continental Shelf	23	2	2011	-77.3701	25.9452	1	Dunn (2013)
Kogia sima	Southeast U.S. Continental Shelf	26	2	2011	-77.2799	25.9011	4	Dunn (2013)
Kogia sima	Southeast U.S. Continental Shelf	5	6	2011	-77.2842	25.9011	4	Dunn (2013)
Kogia sima	Southeast U.S. Continental Shelf	12	7	2011	-77.2829	25.9046	4	Dunn (2013)
Kogia sima	Southeast U.S. Continental Shelf	15	7	2011	-77.3619	25.9467	1	Dunn (2013)
Kogia sima	Caribbean Sea	12	5	1992	-76.9362	25.5498	3	Dunn (2013)
Kogia sima	Caribbean Sea	10	6	1994	-76.6827	24.4708	4	Dunn (2013)
Kogia sima	Caribbean Sea	23	6	1994	-76.8053	25.6458	3	Dunn (2013)
Kogia sima	Caribbean Sea	8	12	1997	-77.3578	25.9026	11	Dunn (2013)
Kogia sima	Caribbean Sea	25	6	1998	-77.3358	25.8905	2	Dunn (2013)
Kogia sima	Caribbean Sea	25	6	1998	-77.4655	25.99	5	Dunn (2013)
Kogia sima	Caribbean Sea	3	7	1998	-77.2639	25.8802	4	Dunn (2013)
Kogia sima	Caribbean Sea	2	8	1998	-77.3643	25.9137	1	Dunn (2013)
Kogia sima	Caribbean Sea	4	8	1998	-77.2474	25.8304	2	Dunn (2013)
Kogia sima	Caribbean Sea	4	8	1998	-77.1692	25.8173	1	Dunn (2013)
Kogia sima	Caribbean Sea	4	8	1998	-77.167	25.8173	1	Dunn (2013)
Kogia sima	Caribbean Sea	4	8	1998	-77.271	25.8928	2	Dunn (2013)
Kogia sima	Caribbean Sea	7	2	1999	-77.2498	25.8394	7	Dunn (2013)
Kogia sima	Caribbean Sea	10	2	1999	-77.1412	25.8802	4	Dunn (2013)
Kogia sima	Caribbean Sea	26	2	1999	-77.2542	25.8506	4	Dunn (2013)
Kogia sima	Caribbean Sea	27	2	1999	-77.445	25.913	2	Dunn (2013)
Kogia sima	Caribbean Sea	6	4	1999	-77.3315	25.8548	2	Dunn (2013)
Kogia sima	Caribbean Sea	12	5	1999	-77.2773	25.8664	6	Dunn (2013)
Kogia sima	Caribbean Sea	17	5	1999	-77.3217	25.8978	3	Dunn (2013)
Kogia sima	Caribbean Sea	19	5	1999	-77.1124	25.8542	1	Dunn (2013)
Kogia sima	Caribbean Sea	19	5	1999	-77.2188	25.8236	5	Dunn (2013)
Kogia sima	Caribbean Sea	19	5	1999	-77.1131	25.8518	1	Dunn (2013)
Kogia sima	Caribbean Sea	19	5	1999	-77.2562	25.8647	1	Dunn (2013)
Kogia sima	Caribbean Sea	20	5	1999	-77.1738	25.8133	2	Dunn (2013)
Kogia sima	Caribbean Sea	23	6	1999	-77.3245	25.9098	7	Dunn (2013)
Kogia sima	Caribbean Sea	23	6	1999	-77.3873	25.8684	2	Dunn (2013)
Kogia sima	Caribbean Sea	23	6	1999	-77.3182	25.9027	2	Dunn (2013)
Kogia sima	Caribbean Sea	24	6	1999	-77.3263	25.8942	2	Dunn (2013)
Kogia sima	Caribbean Sea	21	7	1999	-77.2776	25.8881	6	Dunn (2013)
Kogia sima	Caribbean Sea	25	7	1999	-77.2827	25.8874	1	Dunn (2013)
Kogia sima	Caribbean Sea	26	7	1999	-77.415	25.9422	1	Dunn (2013)
Kogia sima	Caribbean Sea	27	7	1999	-77.4543	25.987	10	Dunn (2013)
Kogia sima	Caribbean Sea	1	2	2000	-77.2522	25.8268	1	Dunn (2013)
Kogia sima	Caribbean Sea	21	3	2000	-77.4609	25.9878	2	Dunn (2013)
Kogia sima	Caribbean Sea	24	3	2000	-61.2603	14.3205	2	Garrison (2013)
Kogia sima	Caribbean Sea	26	3	2000	-64.0182	17.4518	3	Garrison (2013)
Kogia sima	Caribbean Sea	21	4	2000	-77.2745	25.8384	3	Dunn (2013)
Kogia sima	Caribbean Sea	12	5	2000	-77.3285	25.8541	2	Dunn (2013)
Kogia sima	Caribbean Sea	13	5	2000	-77.3715	25.9167	4	Dunn (2013)
Kogia sima	Caribbean Sea	7	6	2000	-77.4652	25.9926	2	Dunn (2013)
Kogia sima	Caribbean Sea	6	7	2000	-77.448	25.9844	3	Dunn (2013)
Kogia sima	Caribbean Sea	9	7	2000	-77.386	25.942	4	Dunn (2013)
Kogia sima	Caribbean Sea	9	8	2000	-77.3744	25.9316	1	Dunn (2013)
Kogia sima	Caribbean Sea	10	8	2000	-77.3792	25.9198	2	Dunn (2013)
Kogia sima	Caribbean Sea	10	8	2000	-77.4084	25.9074	3	Dunn (2013)
Kogia sima	Caribbean Sea	15	8	2000	-77.4365	25.9713	5	Dunn (2013)
Kogia sima	Caribbean Sea	18	11	2000	-77.316	25.8972	2	Dunn (2013)
Kogia sima	Caribbean Sea	17	1	2001	-77.2189	25.8326	1	Dunn (2013)
Kogia sima	Caribbean Sea	23	2	2001	-77.292	25.8888	4	Dunn (2013)
Kogia sima	Caribbean Sea	8	3	2001	-77.342	25.9035	4	Dunn (2013)
Kogia sima	Caribbean Sea	25	3	2001	-76.7597	24.8374	2	Dunn (2013)
Kogia sima	Caribbean Sea	27	5	2001	-77.2872	25.8968	1	Dunn (2013)
Kogia sima	Caribbean Sea	27	5	2001	-77.4367	25.9643	2	Dunn (2013)
Kogia sima	Caribbean Sea	30	5	2001	-77.4412	25.9719	2	Dunn (2013)
Kogia sima	Caribbean Sea	17	1	2002	-77.2774	25.8947	1	Dunn (2013)
Kogia sima	Caribbean Sea	18	1	2002	-77.5406	26.018	1	Dunn (2013)
Kogia sima	Caribbean Sea	20	1	2002	-77.451	25.9604	1	Dunn (2013)
Kogia sima	Caribbean Sea	20	1	2002	-77.4551	25.9826	6	Dunn (2013)
Kogia sima	Caribbean Sea	20	1	2002	-77.4033	25.9485	6	Dunn (2013)
Kogia sima	Caribbean Sea	2	2	2002	-77.3023	25.8677	5	Dunn (2013)
Kogia sima	Caribbean Sea	2	2	2002	-77.4666	25.9766	5	Dunn (2013)
Kogia sima	Caribbean Sea	26	2	2002	-77.4519	25.9672	2	Dunn (2013)
Kogia sima	Caribbean Sea	15	3	2002	-77.4844	25.9709	3	Dunn (2013)
Kogia sima	Caribbean Sea	27	3	2002	-77.3367	25.8979	3	Dunn (2013)
Kogia sima	Caribbean Sea	27	3	2002	-77.2854	25.8955	8	Dunn (2013)
Kogia sima	Caribbean Sea	6	6	2002	-77.4848	25.9778	3	Dunn (2013)
Kogia sima	Caribbean Sea	6	6	2002	-77.3402	25.9155	4	Dunn (2013)
Kogia sima	Caribbean Sea	7	6	2002	-77.2784	25.8822	1	Dunn (2013)
Kogia sima	Caribbean Sea	1	8	2002	-77.4349	25.9769	1	Dunn (2013)
Kogia sima	Caribbean Sea	5	8	2002	-77.3345	25.8895	6	Dunn (2013)
Kogia sima	Caribbean Sea	9	8	2002	-77.4592	25.9672	2	Dunn (2013)
Kogia sima	Caribbean Sea	20	10	2002	-77.2772	25.8917	1	Dunn (2013)
Kogia sima	Caribbean Sea	21	1	2003	-77.2773	25.8768	3	Dunn (2013)
Kogia sima	Caribbean Sea	21	1	2003	-77.3028	25.9033	2	Dunn (2013)
Kogia sima	Caribbean Sea	21	1	2003	-77.2749	25.8684	1	Dunn (2013)
Kogia sima	Caribbean Sea	24	8	2003	-77.4215	25.9558	2	Dunn (2013)
Kogia sima	Caribbean Sea	10	9	2003	-77.3706	25.9256	3	Dunn (2013)
Kogia sima	Caribbean Sea	12	9	2003	-77.4369	25.9829	1	Dunn (2013)
Kogia sima	Caribbean Sea	13	10	2003	-77.3353	25.9152	1	Dunn (2013)
Kogia sima	Caribbean Sea	13	10	2003	-77.3527	25.9115	5	Dunn (2013)
Kogia sima	Caribbean Sea	13	10	2003	-77.2924	25.8811	4	Dunn (2013)
Kogia sima	Caribbean Sea	13	10	2003	-77.4313	25.9372	12	Dunn (2013)
Kogia sima	Caribbean Sea	12	3	2004	-77.4252	25.9729	1	Dunn (2013)
Kogia sima	Caribbean Sea	29	5	2004	-77.4007	25.9567	3	Dunn (2013)
Kogia sima	Caribbean Sea	12	6	2004	-77.3352	25.9092	4	Dunn (2013)
Kogia sima	Caribbean Sea	10	7	2004	-77.2799	25.8876	1	Dunn (2013)
Kogia sima	Caribbean Sea	11	7	2004	-77.4005	25.9452	2	Dunn (2013)
Kogia sima	Caribbean Sea	30	7	2004	-77.272	25.8913	8	Dunn (2013)
Kogia sima	Caribbean Sea	19	8	2004	-77.2797	25.8787	3	Dunn (2013)
Kogia sima	Caribbean Sea	19	8	2004	-77.2958	25.8801	4	Dunn (2013)
Kogia sima	Caribbean Sea	13	12	2004	-77.414	25.9653	5	Dunn (2013)
Kogia sima	Caribbean Sea	25	6	2005	-77.3249	25.9038	4	Dunn (2013)
Kogia sima	Caribbean Sea	25	6	2005	-77.3591	25.9101	1	Dunn (2013)
Kogia sima	Caribbean Sea	25	6	2005	-77.3996	25.9382	3	Dunn (2013)
Kogia sima	Caribbean Sea	27	7	2005	-77.3286	25.8877	3	Dunn (2013)
Kogia sima	Caribbean Sea	3	8	2005	-77.2784	25.8929	1	Dunn (2013)
Kogia sima	Caribbean Sea	7	8	2005	-77.4338	25.9797	2	Dunn (2013)
Kogia sima	Caribbean Sea	7	8	2005	-77.3719	25.9292	1	Dunn (2013)
Kogia sima	Caribbean Sea	19	10	2005	-77.3622	25.9294	3	Dunn (2013)
Kogia sima	Caribbean Sea	10	2	2006	-77.3191	25.8911	3	Dunn (2013)
Kogia sima	Caribbean Sea	28	5	2006	-77.4397	25.9742	5	Dunn (2013)
Kogia sima	Caribbean Sea	28	5	2006	-77.4292	25.9732	3	Dunn (2013)
Kogia sima	Caribbean Sea	4	8	2006	-77.2772	25.8733	3	Dunn (2013)
Kogia sima	Caribbean Sea	4	8	2006	-77.4031	25.955	3	Dunn (2013)
Kogia sima	Caribbean Sea	4	8	2006	-77.4042	25.9563	3	Dunn (2013)
Kogia sima	Caribbean Sea	12	11	2006	-77.4328	25.9674	2	Dunn (2013)
Kogia sima	Caribbean Sea	16	12	2006	-77.4003	25.9665	3	Dunn (2013)
Kogia sima	Caribbean Sea	24	1	2007	-77.3903	25.948	3	Dunn (2013)
Kogia sima	Caribbean Sea	30	1	2007	-77.3072	25.8726	6	Dunn (2013)
Kogia sima	Caribbean Sea	11	2	2007	-77.4004	25.9617	3	Dunn (2013)
Kogia sima	Caribbean Sea	28	4	2007	-77.3881	25.9429	6	Dunn (2013)
Kogia sima	Caribbean Sea	28	4	2007	-77.2614	25.8503	3	Dunn (2013)
Kogia sima	Caribbean Sea	28	4	2007	-77.2723	25.8887	7	Dunn (2013)
Kogia sima	Caribbean Sea	14	6	2007	-77.4293	25.9794	3	Dunn (2013)
Kogia sima	Caribbean Sea	24	6	2007	-77.2888	25.8977	12	Dunn (2013)
Kogia sima	Caribbean Sea	24	6	2007	-77.3902	25.956	1	Dunn (2013)
Kogia sima	Caribbean Sea	14	3	2008	-77.3987	25.9633	3	Dunn (2013)
Kogia sima	Caribbean Sea	1	6	2009	-78.3339	26.3457	2	Dunn (2013)
Kogia sima	Caribbean Sea	21	8	2009	-68.8333	18.2583	4	Vázquez-Castán et al. (2012)
Kogia sima	Caribbean Sea	16	9	2009	-76.3253	24.7436	3	Dunn (2013)
Kogia sima	Caribbean Sea	16	9	2009	-76.3091	24.7293	1	Dunn (2013)
Kogia sima	Caribbean Sea	28	5	2010	-77.2796	25.8945	5	Dunn (2013)
Kogia sima	Caribbean Sea	28	7	2010	-77.5493	26.0448	1	Dunn (2013)
Kogia sima	Caribbean Sea	15	2	2011	-77.3145	25.9036	3	Dunn (2013)
Kogia sima	Caribbean Sea	13	5	2011	-77.3167	25.9041	1	Dunn (2013)
Kogia sima	Caribbean Sea	13	6	2011	-77.8864	25.3198	1	Dunn (2013)
Kogia sima	Caribbean Sea	14	6	2011	-77.2613	25.1707	3	Dunn (2013)

## Sheet: Cuvier's beaked whale
Species	Locality	Day	Month	Year	Longitude	Latitude	Group size	Reference
Ziphius cavitostris	Gulf of Mexico	17	5	1990	-88.8833	27.0138	NA	NOAA (1990)
Ziphius cavitostris	Gulf of Mexico	15	5	1993	-88.0166	28.55	1	NOAA (1993)
Ziphius cavitostris	Gulf of Mexico	27	5	1993	-91	27	1	NOAA (1993)
Ziphius cavitostris	Gulf of Mexico	28	5	1993	-92	26.5666	2	NOAA (1993)
Ziphius cavitostris	Gulf of Mexico	15	5	1994	-89.8166	27.4833	1	NOAA (1994)
Ziphius cavitostris	Gulf of Mexico	17	5	1994	-84.5666	25.4	1	NOAA (1994)
Ziphius cavitostris	Gulf of Mexico	17	5	1994	-84.5333	25.1666	1	NOAA (1994)
Ziphius cavitostris	Gulf of Mexico	29	8	1994	-84.5166	25.9	1	NOAA (1994)
Ziphius cavitostris	Gulf of Mexico	20	5	1996	-90	27	4	Garrison (2013)
Ziphius cavitostris	Gulf of Mexico	24	5	1996	-94	26	1	Garrison (2013)
Ziphius cavitostris	Gulf of Mexico	14	5	1997	-88.4333	26.0166	4	NOAA (1997)
Ziphius cavitostris	Gulf of Mexico	24	4	1999	-85	27	2	Garrison (2013)
Ziphius cavitostris	Gulf of Mexico	22	4	2000	-83.9	24.5333	3	NOAA (2000)
Ziphius cavitostris	Gulf of Mexico	7	5	2000	-88.75	28.65	1	NOAA (2000)
Ziphius cavitostris	Gulf of Mexico	13	5	2000	-84.8166	25.9666	3	NOAA (2000)
Ziphius cavitostris	Gulf of Mexico	25	3	2001	-84.45	25.15	2	NOAA (2001)
Ziphius cavitostris	Gulf of Mexico	25	3	2001	-84.4333	25.15	1	NOAA (2001)
Ziphius cavitostris	Gulf of Mexico	12	5	2001	-84.9833	26.6166	1	NOAA (2001)
Ziphius cavitostris	Gulf of Mexico	16	5	2001	-85.9833	27.0666	1	NOAA (2001)
Ziphius cavitostris	Gulf of Mexico	20	5	2001	-89	27.9833	1	NOAA (2001)
Ziphius cavitostris	Gulf of Mexico	30	5	2001	-88.65	28.6666	1	NOAA (2001)
Ziphius cavitostris	Gulf of Mexico	27	7	2004	-88	28	1	NOAA (2001)
Ziphius cavitostris	Southeast U.S. Continental Shelf	22	2	1992	-77.5407	31.4993	3	Garrison (2013)
Ziphius cavitostris	Southeast U.S. Continental Shelf	15	3	1994	-76.9169	26.4825	2	Dunn (2013)
Ziphius cavitostris	Southeast U.S. Continental Shelf	4	2	1995	-78.5355	32.7927	1	Garrison (2013)
Ziphius cavitostris	Southeast U.S. Continental Shelf	20	5	1996	-76.9417	26.4833	2	Dunn (2013)
Ziphius cavitostris	Southeast U.S. Continental Shelf	20	5	1998	-76.9117	26.4959	1	Dunn (2013)
Ziphius cavitostris	Southeast U.S. Continental Shelf	3	8	1998	-76.9654	26.6425	1	Dunn (2013)
Ziphius cavitostris	Southeast U.S. Continental Shelf	9	8	1998	-77.3636	25.9384	2	Dunn (2013)
Ziphius cavitostris	Southeast U.S. Continental Shelf	21	7	1999	-77.339	33.93	4	McLellan (2006)
Ziphius cavitostris	Southeast U.S. Continental Shelf	21	7	1999	-77.3395	33.9303	4	McLellan (2005)
Ziphius cavitostris	Southeast U.S. Continental Shelf	3	8	1999	-77.3261	25.9154	1	Dunn (2013)
Ziphius cavitostris	Southeast U.S. Continental Shelf	15	3	2000	-77.4067	25.9994	1	Dunn (2013)
Ziphius cavitostris	Southeast U.S. Continental Shelf	15	3	2000	-77.4057	26.0117	1	Dunn (2013)
Ziphius cavitostris	Southeast U.S. Continental Shelf	11	9	2003	-77.3723	25.9529	2	Dunn (2013)
Ziphius cavitostris	Southeast U.S. Continental Shelf	12	6	2004	-77.3549	25.9379	2	Dunn (2013)
Ziphius cavitostris	Southeast U.S. Continental Shelf	6	7	2004	-77.291	25.9017	1	Dunn (2013)
Ziphius cavitostris	Southeast U.S. Continental Shelf	8	7	2004	-77.306	25.9088	1	Dunn (2013)
Ziphius cavitostris	Southeast U.S. Continental Shelf	26	7	2004	-77.2827	25.9	1	Dunn (2013)
Ziphius cavitostris	Southeast U.S. Continental Shelf	22	1	2005	-77.3972	25.9645	2	Dunn (2013)
Ziphius cavitostris	Southeast U.S. Continental Shelf	15	6	2010	-76.8912	26.6414	1	Dunn (2013)
Ziphius cavitostris	Southeast U.S. Continental Shelf	14	6	2011	-75.023	35.1548	4	McLellan (2014)
Ziphius cavitostris	Southeast U.S. Continental Shelf	30	3	2013	-74.9611	35.1764	2	McLellan (2014)
Ziphius cavitostris	Caribbean Sea	NA	10	1989	-64.6333	11.8	2	Romero et al. (2001)
Ziphius cavitostris	Caribbean Sea	7	6	1991	-81.45	23.7666	4	Jefferson and Lynn (1994)
Ziphius cavitostris	Caribbean Sea	2	1	1995	-61.4408	15.2708	2	Boisseau (2014)
Ziphius cavitostris	Caribbean Sea	21	1	1997	-77.3683	25.8787	2	Dunn (2013)
Ziphius cavitostris	Caribbean Sea	6	3	1997	-77.2683	25.8881	2	Dunn (2013)
Ziphius cavitostris	Caribbean Sea	9	4	1997	-77.293	25.848	1	Dunn (2013)
Ziphius cavitostris	Caribbean Sea	1	5	1997	-77.3383	25.8843	1	Dunn (2013)
Ziphius cavitostris	Caribbean Sea	1	7	1998	-77.28	25.8633	4	Dunn (2013)
Ziphius cavitostris	Caribbean Sea	3	8	1998	-77.3177	25.894	4	Dunn (2013)
Ziphius cavitostris	Caribbean Sea	4	8	1998	-77.2604	25.875	3	Dunn (2013)
Ziphius cavitostris	Caribbean Sea	7	2	1999	-77.3775	25.8899	3	Dunn (2013)
Ziphius cavitostris	Caribbean Sea	26	2	1999	-77.3327	25.8855	5	Dunn (2013)
Ziphius cavitostris	Caribbean Sea	26	3	1999	-77.9041	25.3826	3	Dunn (2013)
Ziphius cavitostris	Caribbean Sea	23	6	1999	-77.38	25.8694	1	Dunn (2013)
Ziphius cavitostris	Caribbean Sea	1	3	2000	-77.2743	25.8453	4	Dunn (2013)
Ziphius cavitostris	Caribbean Sea	24	3	2000	-61.0073	14.3227	3	Garrison (2013)
Ziphius cavitostris	Caribbean Sea	13	5	2000	-77.6333	25.9038	2	Dunn (2013)
Ziphius cavitostris	Caribbean Sea	5	3	2001	-66.9333	18.8666	3	Swartz et al. (2002)
Ziphius cavitostris	Caribbean Sea	2	2	2002	-77.5398	26.0309	4	Dunn (2013)
Ziphius cavitostris	Caribbean Sea	3	2	2002	-77.3696	25.9385	2	Dunn (2013)
Ziphius cavitostris	Caribbean Sea	3	2	2002	-77.3542	25.9215	2	Dunn (2013)
Ziphius cavitostris	Caribbean Sea	8	3	2002	-77.3378	25.8863	3	Dunn (2013)
Ziphius cavitostris	Caribbean Sea	15	3	2002	-77.3497	25.917	3	Dunn (2013)
Ziphius cavitostris	Caribbean Sea	11	7	2002	-77.4307	25.9082	2	Dunn (2013)
Ziphius cavitostris	Caribbean Sea	6	4	2005	-61.46	15.26	3	Gero y Whitehead
Ziphius cavitostris	Caribbean Sea	14	7	2005	-77.4215	25.9733	2	Dunn (2013)
Ziphius cavitostris	Caribbean Sea	7	8	2005	-77.45	25.9552	3	Dunn (2013)
Ziphius cavitostris	Caribbean Sea	9	2	2007	-77.2725	25.8924	2	Dunn (2013)
Ziphius cavitostris	Caribbean Sea	11	2	2007	-77.2742	25.8947	2	Dunn (2013)
Ziphius cavitostris	Caribbean Sea	24	6	2007	-77.3151	25.9048	2	Dunn (2013)
Ziphius cavitostris	Caribbean Sea	24	6	2007	-77.3483	25.9016	2	Dunn (2013)
Ziphius cavitostris	Caribbean Sea	4	3	2008	-62.4365	14.3965	NA	van Cannyet (2018)
Ziphius cavitostris	Caribbean Sea	6	5	2009	-76.9326	25.4737	3	Dunn (2013)
Ziphius cavitostris	Caribbean Sea	27	5	2009	-76.7677	23.7273	2	Dunn (2013)
Ziphius cavitostris	Caribbean Sea	28	5	2009	-77.0861	23.5278	3	Dunn (2013)
Ziphius cavitostris	Caribbean Sea	28	5	2009	-77.0441	23.4863	5	Dunn (2013)
Ziphius cavitostris	Caribbean Sea	29	5	2009	-76.5986	23.6603	1	Dunn (2013)
Ziphius cavitostris	Caribbean Sea	29	5	2009	-76.6443	23.7685	2	Dunn (2013)
Ziphius cavitostris	Caribbean Sea	29	5	2009	-76.6535	23.7612	3	Dunn (2013)
Ziphius cavitostris	Caribbean Sea	16	9	2009	-76.2639	24.6704	3	Dunn (2013)
Ziphius cavitostris	Caribbean Sea	16	9	2009	-76.2919	24.6826	3	Dunn (2013)
Ziphius cavitostris	Caribbean Sea	6	6	2011	-78.3214	26.4428	2	Dunn (2013)
Ziphius cavitostris	Caribbean Sea	6	6	2011	-78.3292	26.4222	1	Dunn (2013)
Ziphius cavitostris	Caribbean Sea	13	6	2011	-77.9102	25.4093	3	Dunn (2013)
Ziphius cavitostris	Caribbean Sea	25	10	2017	-63.6137	17.8011	NA	van Cannyet (2018)

## Sheet: Pygmy killer whale
Species	Locality	Day	Month	Year	Longitude	Latitude	Group size	Reference
Feresa attenuata	Gulf of Mexico	17	5	1990	-87.9805	26.85	NA	NOAA (1990)
Feresa attenuata	Gulf of Mexico	18	5	1990	-89.4666	26	NA	NOAA (1990)
Feresa attenuata	Gulf of Mexico	24	5	1992	-94.6	27.5	13	Garrison (2013)
Feresa attenuata	Gulf of Mexico	29	5	1992	-94.3	27.2	10	Garrison (2013)
Feresa attenuata	Gulf of Mexico	20	5	1993	-86	26.4	10	NOAA (1993)
Feresa attenuata	Gulf of Mexico	19	4	1997	-84.6	24.5	13	NOAA (1997)
Feresa attenuata	Gulf of Mexico	20	5	1999	-87	28.1	6	Garrison (2013)
Feresa attenuata	Gulf of Mexico	15	5	2000	-85	24.8	4	NOAA (2000)
Feresa attenuata	Gulf of Mexico	16	5	2000	-86.4	25.6	12	NOAA (2000)
Feresa attenuata	Gulf of Mexico	20	5	2000	-90	27.1	15	NOAA (2000)
Feresa attenuata	Gulf of Mexico	14	5	2001	-84.3	24.4	2	Garrison (2013)
Feresa attenuata	Gulf of Mexico	2	7	2002	-88.1	28.9	40	Epperson (2013)
Feresa attenuata	Gulf of Mexico	28	5	2003	-86.7	27.1	10	Holts et al. (2014)
Feresa attenuata	Southeast U.S. Continental Shelf	4	2	1992	-77.0787	31.5822	3	Garrison (2013)
Feresa attenuata	Southeast U.S. Continental Shelf	11	6	2011	-78.0866	26.0488	25	Dunn (2013)
Feresa attenuata	Caribbean Sea	19	1	2000	-61.8491	16.1637	5	Boisseau (2014)
Feresa attenuata	Caribbean Sea	20	1	2000	-61.8646	16.2106	12	Boisseau (2014)
Feresa attenuata	Caribbean Sea	21	1	2000	-61.8442	16.1936	10	Boisseau (2014)
Feresa attenuata	Caribbean Sea	24	1	2000	-61.8001	16.1021	1	Boisseau (2014)
Feresa attenuata	Caribbean Sea	9	8	2000	-77.4245	25.9544	30	Dunn (2013)
Feresa attenuata	Caribbean Sea	26	6	2003	-64.4482	10.4857	4	Bermudez-Villapol et al. (2006)
Feresa attenuata	Caribbean Sea	10	7	2003	-64.4398	10.5106	3	Bermudez-Villapol et al. (2006)
Feresa attenuata	Caribbean Sea	14	8	2003	-64.5256	10.3562	3	Bermudez-Villapol et al. (2006)
Feresa attenuata	Caribbean Sea	17	10	2008	-62.2063	16.8026	14	Weir et al. (2011)

## Sheet: Melon-headed whale
Species	Locality	Day	Month	Year	Longitude	Latitude	Group size	Reference
Peponocephala electra	Gulf of Mexico	20	5	1992	-93.0513	27.1542	73	Garrison (2013)
Peponocephala electra	Gulf of Mexico	4	6	1992	-91.0627	26.255	100	Garrison (2013)
Peponocephala electra	Gulf of Mexico	5	6	1992	-89.9585	27.4805	73	Garrison (2013)
Peponocephala electra	Gulf of Mexico	19	8	1992	-93.1622	26.2113	250	Jefferson (1995)
Peponocephala electra	Gulf of Mexico	12	1	1993	-93.0605	26.5672	60	NOAA (1993)
Peponocephala electra	Gulf of Mexico	20	5	1993	-86.0247	26.6305	35	NOAA (1993)
Peponocephala electra	Gulf of Mexico	1	6	1993	-94.1763	27.453	156	Jefferson (1995)
Peponocephala electra	Gulf of Mexico	1	6	1993	-96.0087	26.0367	30	NOAA (1993)
Peponocephala electra	Gulf of Mexico	31	5	1994	-92.7243	27.367	175	NOAA (1994)
Peponocephala electra	Gulf of Mexico	3	6	1994	-93.9795	27.2408	125	NOAA (1994)
Peponocephala electra	Gulf of Mexico	5	6	1994	-92.1783	27.1085	190	NOAA (1994)
Peponocephala electra	Gulf of Mexico	9	6	1994	-89.3872	28.1672	275	NOAA (1994)
Peponocephala electra	Gulf of Mexico	23	5	1996	-93.0332	27.2203	125	Garrison (2013)
Peponocephala electra	Gulf of Mexico	10	5	1999	-90.0493	27.7695	65	Garrison (2013)
Peponocephala electra	Gulf of Mexico	8	9	1999	-94.4833	27.5333	175	NOAA (1999)
Peponocephala electra	Gulf of Mexico	2	5	2000	-91.9707	25.9988	25	NOAA (2000)
Peponocephala electra	Gulf of Mexico	22	5	2000	-90.0477	27.5197	70	NOAA (2000)
Peponocephala electra	Gulf of Mexico	28	5	2000	-91.8622	27.4265	70	NOAA (2000)
Peponocephala electra	Gulf of Mexico	30	3	2001	-84.85	23.8666	80	NOAA (2001)
Peponocephala electra	Gulf of Mexico	7	5	2001	-88.7292	28.7353	70	Garrison (2013)
Peponocephala electra	Gulf of Mexico	20	5	2001	-89.0617	27.9663	90	Garrison (2013)
Peponocephala electra	Gulf of Mexico	30	5	2001	-89.0208	28.3105	150	Garrison (2013)
Peponocephala electra	Gulf of Mexico	2	6	2003	-87.016	28.3501	50	Epperson (2013)
Peponocephala electra	Gulf of Mexico	14	6	2003	-86.8251	28.3791	230	Epperson (2013)
Peponocephala electra	Gulf of Mexico	14	6	2003	-87.0394	28.3527	20	Epperson (2013)
Peponocephala electra	Gulf of Mexico	14	6	2003	-94.0362	27.4422	14	Epperson (2013)
Peponocephala electra	Gulf of Mexico	5	6	2004	-88.7453	28.7866	5	Epperson (2013)
Peponocephala electra	Gulf of Mexico	8	7	2004	-89.57	28.11	30	Epperson (2013)
Peponocephala electra	Gulf of Mexico	17	6	2005	-87.56	29.1	200	Epperson (2013)
Peponocephala electra	Gulf of Mexico	20	6	2005	-95.7364	26.7999	20	Epperson (2013)
Peponocephala electra	Gulf of Mexico	20	6	2005	-95.7349	26.7955	20	Epperson (2013)
Peponocephala electra	Gulf of Mexico	26	6	2005	-93.7939	27.2893	30	Epperson (2013)
Peponocephala electra	Gulf of Mexico	26	6	2005	-93.8058	27.2781	1	Epperson (2013)
Peponocephala electra	Gulf of Mexico	26	6	2005	-93.805	27.2811	30	Epperson (2013)
Peponocephala electra	Gulf of Mexico	26	6	2005	-93.8015	27.2838	30	Epperson (2013)
Peponocephala electra	Gulf of Mexico	26	6	2005	-93.8058	27.2784	1	Epperson (2013)
Peponocephala electra	Gulf of Mexico	28	6	2005	-90.35	27.96	15	Epperson (2013)
Peponocephala electra	Gulf of Mexico	25	7	2005	-92.99	26.84	80	Epperson (2013)
Peponocephala electra	Gulf of Mexico	30	7	2005	-88.88	28.16	30	Epperson (2013)
Peponocephala electra	Gulf of Mexico	26	11	2007	-95.184	27.1922	18	Holts et al. (2014)
Peponocephala electra	Southeast U.S. Continental Shelf	20	6	2004	-77.383	25.9626	100	Dunn (2013)
Peponocephala electra	Southeast U.S. Continental Shelf	4	7	2004	-77.4045	25.9735	75	Dunn (2013)
Peponocephala electra	Southeast U.S. Continental Shelf	26	7	2011	-77.6824	26.1449	250	Dunn (2013)
Peponocephala electra	Southeast U.S. Continental Shelf	26	7	2011	-77.6625	26.1245	250	Dunn (2013)
Peponocephala electra	Southeast U.S. Continental Shelf	14	3	2012	-75.0408	35.1593	185	McLellan (2014)
Peponocephala electra	Caribbean Sea	NA	6	1994	-61.15	14.5272	2	Lanfredi y di Sciara.(2014)
Peponocephala electra	Caribbean Sea	NA	20	1994	-61.4242	15.3306	2	Lanfredi y di Sciara.(2014)
Peponocephala electra	Caribbean Sea	NA	25	1994	-61.0747	14.4169	1	Lanfredi y di Sciara.(2014)
Peponocephala electra	Caribbean Sea	12	2	1996	-61.5245	12.5873	20	Boisseau (2014)
Peponocephala electra	Caribbean Sea	18	6	1997	-77.2736	25.8726	500	Dunn (2013)
Peponocephala electra	Caribbean Sea	29	9	1997	-68.3666	12.2	70	Debrot et al. (1998)
Peponocephala electra	Caribbean Sea	19	3	2000	-61.7805	12.2148	38	Garrison (2013)
Peponocephala electra	Caribbean Sea	NA	4	2004	-61.1	11.9	NA	Yoshida et al. (2010)
Peponocephala electra	Caribbean Sea	NA	4	2004	-60	12.8	NA	Yoshida et al. (2010)
Peponocephala electra	Caribbean Sea	NA	4	2004	-60.5	13.2	NA	Yoshida et al. (2010)
Peponocephala electra	Caribbean Sea	20	6	2004	-77.2845	25.8764	100	Dunn (2013)
Peponocephala electra	Caribbean Sea	20	6	2004	-77.3107	25.9055	200	Dunn (2013)
Peponocephala electra	Caribbean Sea	6	7	2004	-77.2849	25.8905	65	Dunn (2013)
Peponocephala electra	Caribbean Sea	2	3	2005	-61.5	15.36	20	Gero y Whitehead
Peponocephala electra	Caribbean Sea	2	3	2005	-61.49	15.36	NA	Gero y Whitehead
Peponocephala electra	Caribbean Sea	3	3	2005	-61.52	15.44	12	Gero y Whitehead
Peponocephala electra	Caribbean Sea	4	3	2005	-61.44	15.25	20	Gero y Whitehead
Peponocephala electra	Caribbean Sea	9	4	2005	-61.46	15.27	5	Gero y Whitehead
Peponocephala electra	Caribbean Sea	9	4	2005	-61.51	15.46	4	Gero y Whitehead
Peponocephala electra	Caribbean Sea	29	9	2008	-77.5418	24.6675	90	Dunn (2013)
Peponocephala electra	Caribbean Sea	22	4	2009	-77.388	24.448	200	Dunn (2013)
Peponocephala electra	Caribbean Sea	2	5	2009	-77.6321	24.6969	250	Dunn (2013)
Peponocephala electra	Caribbean Sea	3	5	2009	-77.3977	24.3805	300	Dunn (2013)
Peponocephala electra	Caribbean Sea	3	5	2009	-77.3645	24.3687	30	Dunn (2013)
Peponocephala electra	Caribbean Sea	12	5	2009	-77.5681	24.4544	225	Dunn (2013)
Peponocephala electra	Caribbean Sea	13	5	2009	-77.4323	24.2229	150	Dunn (2013)
Peponocephala electra	Caribbean Sea	26	4	2010	-77.4986	24.6149	90	Dunn (2013)
Peponocephala electra	Caribbean Sea	27	4	2010	-77.5327	24.6526	90	Dunn (2013)
Peponocephala electra	Caribbean Sea	5	5	2010	-77.3684	24.3551	250	Dunn (2013)
Peponocephala electra	Caribbean Sea	6	5	2010	-77.5129	24.6081	250	Dunn (2013)
Peponocephala electra	Caribbean Sea	7	5	2010	-77.3673	24.3586	100	Dunn (2013)
Peponocephala electra	Caribbean Sea	7	5	2010	-77.4342	24.4118	80	Dunn (2013)
Peponocephala electra	Caribbean Sea	7	5	2010	-77.3777	24.3593	250	Dunn (2013)
Peponocephala electra	Caribbean Sea	5	5	2011	-77.3739	24.3693	40	Dunn (2013)
Peponocephala electra	Caribbean Sea	6	5	2011	-77.4861	24.6322	40	Dunn (2013)
Peponocephala electra	Caribbean Sea	6	5	2011	-77.4774	24.6277	40	Dunn (2013)
Peponocephala electra	Caribbean Sea	15	6	2011	-77.4061	25.136	200	Dunn (2013)
Peponocephala electra	Caribbean Sea	16	7	2011	-77.0785	25.7822	150	Dunn (2013)

## Sheet: False killer whale
Species	Locality	Day	Month	Year	Longitude	Latitude	Group size	Reference
Pseudorca crassidens	Gulf of Mexico	NA	8	1986	-87.2333	21.75	3	Zacarias et al. (1987)
Pseudorca crassidens	Gulf of Mexico	NA	1	1987	-91.05	19.4	4	Fuentes-Allen et al. (1988)
Pseudorca crassidens	Gulf of Mexico	23	5	1990	-87.9944	27.9944	NA	NOAA (1990)
Pseudorca crassidens	Gulf of Mexico	25	4	1992	-86.0215	25.4403	15	Garrison (2013)
Pseudorca crassidens	Gulf of Mexico	27	5	1993	-90.1683	28.1166	2	Jefferson (1995)
Pseudorca crassidens	Gulf of Mexico	30	5	1993	-97.1772	27.9022	4	Jefferson (1995)
Pseudorca crassidens	Gulf of Mexico	13	6	1993	-85.0215	27.197	6	NOAA (1993)
Pseudorca crassidens	Gulf of Mexico	3	5	1994	-86.9797	28.253	50	NOAA (1994)
Pseudorca crassidens	Gulf of Mexico	10	5	1994	-93.019	27.9072	3	NOAA (1994)
Pseudorca crassidens	Gulf of Mexico	3	9	1995	-94.1833	20.55	4	Ortega-Ortiz et al. (1998)
Pseudorca crassidens	Gulf of Mexico	3	9	1995	-95.333	20.583	NA	Ortega-Ortiz et al. (1998)
Pseudorca crassidens	Gulf of Mexico	20	4	1997	-85.9883	25.4838	65	NOAA (1997)
Pseudorca crassidens	Gulf of Mexico	2	6	1997	-86.1215	28.0592	35	NOAA (1997)
Pseudorca crassidens	Gulf of Mexico	2	6	1997	-86.2548	28.0727	22	NOAA (1997)
Pseudorca crassidens	Gulf of Mexico	25	4	1999	-83.48	24.493	4	NOAA (1999)
Pseudorca crassidens	Gulf of Mexico	17	5	2000	-86.0735	27.8953	7	NOAA (2000)
Pseudorca crassidens	Gulf of Mexico	29	3	2001	-86.9166	25.0833	15	NOAA (2001)
Pseudorca crassidens	Gulf of Mexico	4	5	2001	-95.9507	27.4698	70	Garrison (2013)
Pseudorca crassidens	Gulf of Mexico	5	7	2002	-89.2133	28.2019	5	Epperson (2013)
Pseudorca crassidens	Gulf of Mexico	2	8	2005	-86.17	28.22	18	Epperson (2013)
Pseudorca crassidens	Southeast U.S. Continental Shelf	28	8	1985	-76.3	34.5	5	Hyrenbach et al. (2012)
Pseudorca crassidens	Southeast U.S. Continental Shelf	17	1	1992	-79.1328	30.1777	3	Garrison (2013)
Pseudorca crassidens	Southeast U.S. Continental Shelf	17	1	1992	-79.732	30.2347	2	Garrison (2013)
Pseudorca crassidens	Caribbean Sea	17	8	1966	-77.8	22.5	5	Whitt (2015)
Pseudorca crassidens	Caribbean Sea	NA	8	1979	-64.6333	10.2666	1	Romero et al. (2001)
Pseudorca crassidens	Caribbean Sea	10	12	1986	-86.7333	21.35	1	de la Parra (2001)
Pseudorca crassidens	Caribbean Sea	8	1	1987	-86.7	21.2	13	de la Parra (2001)
Pseudorca crassidens	Caribbean Sea	18	2	1987	-86.7	21.3666	1	de la Parra (2001)
Pseudorca crassidens	Caribbean Sea	20	2	1987	-86.7	21.333	1	de la Parra (2001)
Pseudorca crassidens	Caribbean Sea	15	4	1987	-86.4833	21.2333	8	de la Parra (2001)
Pseudorca crassidens	Caribbean Sea	22	4	1987	-86.5997	21.2663	12	de la Parra (2001)
Pseudorca crassidens	Caribbean Sea	24	4	1987	-86.5663	21.2833	18	de la Parra (2001)
Pseudorca crassidens	Caribbean Sea	25	4	1987	-86.5997	21.2663	13	de la Parra (2001)
Pseudorca crassidens	Caribbean Sea	30	4	1987	-86.6833	21.3833	28	de la Parra (2001)
Pseudorca crassidens	Caribbean Sea	4	5	1987	-86.7333	21.4333	39	de la Parra (2001)
Pseudorca crassidens	Caribbean Sea	7	5	1987	-86.7333	21.3666	30	de la Parra (2001)
Pseudorca crassidens	Caribbean Sea	8	5	1987	-86.7	21.4333	29	de la Parra (2001)
Pseudorca crassidens	Caribbean Sea	12	5	1987	-86.7166	21.3833	32	de la Parra (2001)
Pseudorca crassidens	Caribbean Sea	15	5	1987	-86.6666	21.4663	17	de la Parra (2001)
Pseudorca crassidens	Caribbean Sea	14	7	1987	-86.4	21.333	15	de la Parra (2001)
Pseudorca crassidens	Caribbean Sea	23	2	1988	-86.7166	21.1833	28	de la Parra (2001)
Pseudorca crassidens	Caribbean Sea	23	2	1988	-86.7	21.2	7	de la Parra (2001)
Pseudorca crassidens	Caribbean Sea	6	4	1988	-86.6833	21.3166	30	de la Parra (2001)
Pseudorca crassidens	Caribbean Sea	6	5	1988	-86.5497	21.45	2	de la Parra (2001)
Pseudorca crassidens	Caribbean Sea	1	4	1989	-86.583	21.25	59	de la Parra (2001)
Pseudorca crassidens	Caribbean Sea	2	4	1989	-86.6833	21.2663	60	de la Parra (2001)
Pseudorca crassidens	Caribbean Sea	6	4	1989	-86.7	21.2663	48	de la Parra (2001)
Pseudorca crassidens	Caribbean Sea	15	4	1989	-86.6333	21.3997	3	de la Parra (2001)
Pseudorca crassidens	Caribbean Sea	29	4	1989	-86.6666	21.3997	35	de la Parra (2001)
Pseudorca crassidens	Caribbean Sea	30	4	1989	-86.7	21.3833	45	de la Parra (2001)
Pseudorca crassidens	Caribbean Sea	14	12	1989	-86.7333	21.1833	34	de la Parra (2001)
Pseudorca crassidens	Caribbean Sea	7	2	1990	-86.7333	21.1497	21	de la Parra (2001)
Pseudorca crassidens	Caribbean Sea	25	4	1990	-86.6833	21.2663	41	de la Parra (2001)
Pseudorca crassidens	Caribbean Sea	12	6	1990	-86.7	21.2663	14	de la Parra (2001)
Pseudorca crassidens	Caribbean Sea	7	8	1990	-80.5	14.4	4	Pardo et al. (2009)
Pseudorca crassidens	Caribbean Sea	9	1	1991	-86.7	21.2	21	de la Parra (2001)
Pseudorca crassidens	Caribbean Sea	13	3	1991	-86.6833	21.2663	34	de la Parra (2001)
Pseudorca crassidens	Caribbean Sea	21	4	1991	-86.75	21.1666	3	de la Parra (2001)
Pseudorca crassidens	Caribbean Sea	21	5	1991	-86.5663	21.4333	9	de la Parra (2001)
Pseudorca crassidens	Caribbean Sea	11	2	1992	-86.7333	21.1833	15	de la Parra (2001)
Pseudorca crassidens	Caribbean Sea	22	4	1993	-86.6833	21.2663	17	de la Parra (2001)
Pseudorca crassidens	Caribbean Sea	19	2	1994	-86.6833	21.2663	5	de la Parra (2001)
Pseudorca crassidens	Caribbean Sea	19	5	1994	-86.6833	21.333	35	de la Parra (2001)
Pseudorca crassidens	Caribbean Sea	26	5	1995	-86.7333	21.3666	19	de la Parra (2001)
Pseudorca crassidens	Caribbean Sea	29	5	1995	-86.6833	21.2663	45	de la Parra (2001)
Pseudorca crassidens	Caribbean Sea	24	2	1996	-86.583	21.2	3	de la Parra (2001)
Pseudorca crassidens	Caribbean Sea	27	2	1996	-86.5663	21.2163	7	de la Parra (2001)
Pseudorca crassidens	Caribbean Sea	18	3	1996	-61.7518	12.1693	25	Boisseau (2014)
Pseudorca crassidens	Caribbean Sea	20	3	1996	-61.8693	12.0568	10	Boisseau (2014)
Pseudorca crassidens	Caribbean Sea	23	4	1996	-86.7	21.2663	12	de la Parra (2001)
Pseudorca crassidens	Caribbean Sea	3	12	1996	-86.65	21.333	4	de la Parra (2001)
Pseudorca crassidens	Caribbean Sea	20	3	1997	-86.65	21.333	16	de la Parra (2001)
Pseudorca crassidens	Caribbean Sea	21	3	1997	-86.3663	21.3666	11	de la Parra (2001)
Pseudorca crassidens	Caribbean Sea	25	3	1997	-86.4666	21.3	28	de la Parra (2001)
Pseudorca crassidens	Caribbean Sea	25	3	1997	-86.4833	21.3	10	de la Parra (2001)
Pseudorca crassidens	Caribbean Sea	25	3	1997	-86.533	21.3166	12	de la Parra (2001)
Pseudorca crassidens	Caribbean Sea	23	4	1997	-86.65	21.2163	3	de la Parra (2001)
Pseudorca crassidens	Caribbean Sea	10	7	1997	-86.7333	21.5333	8	de la Parra (2001)
Pseudorca crassidens	Caribbean Sea	3	4	1998	-86.6833	21.3	5	de la Parra (2001)
Pseudorca crassidens	Caribbean Sea	7	4	1998	-86.7	21.2663	17	de la Parra (2001)
Pseudorca crassidens	Caribbean Sea	27	7	1999	-86.7	21.35	7	de la Parra (2001)
Pseudorca crassidens	Caribbean Sea	3	8	1999	-86.5663	21.3166	34	de la Parra (2001)
Pseudorca crassidens	Caribbean Sea	23	2	2000	-61.4993	12.1152	4	Garrison (2013)
Pseudorca crassidens	Caribbean Sea	17	3	2000	-86.75	21.2833	2	de la Parra (2001)
Pseudorca crassidens	Caribbean Sea	1	3	2001	-67.7166	17.5	9	Swartz et al. (2002)
Pseudorca crassidens	Caribbean Sea	11	2	2008	-61.6763	16.7042	NA	van Canneyt (2018)
Pseudorca crassidens	Caribbean Sea	26	9	2008	-77.5521	24.2814	13	Dunn (2013)
Pseudorca crassidens	Caribbean Sea	29	4	2010	-70.0262	12.4851	12	Luksenburg (2011)
Pseudorca crassidens	Caribbean Sea	24	10	2017	-61.1055	15.7075	NA	van Canneyt (2018)
Pseudorca crassidens	Caribbean Sea	24	10	2017	-61.1043	15.7062	NA	van Canneyt (2018)
Pseudorca crassidens	Caribbean Sea	24	10	2017	-61.1075	15.7055	NA	van Canneyt (2018)
Pseudorca crassidens	Caribbean Sea	24	10	2017	-61.1103	15.7067	NA	van Canneyt (2018)
Pseudorca crassidens	Caribbean Sea	24	10	2017	-61.1101	15.705	NA	van Canneyt (2018)
Pseudorca crassidens	Caribbean Sea	24	10	2017	-61.1129	15.7063	NA	van Canneyt (2018)
Pseudorca crassidens	Caribbean Sea	24	10	2017	-61.1069	15.6921	NA	van Canneyt (2018)
Pseudorca crassidens	Caribbean Sea	24	10	2017	-61.1136	15.6904	NA	van Canneyt (2018)

## Sheet: Short-finned pilot whale
Species	Locality	Day	Month	Year	Longitude	Latitude	Group size	Reference
Globicephala macrorhynchus	Gulf of Mexico	NA	5	1954	-94.1666	19.0833	30	Caldwell (1955)
Globicephala macrorhynchus	Gulf of Mexico	5	6	1970	-94.48	18.5397	1	Lowery (1974) cited by Ortega-Ortiz (2002)
Globicephala macrorhynchus	Gulf of Mexico	NA	3	1984	-95.5	20.9833	7	Lopez-Sanchez et al. (1984)
Globicephala macrorhynchus	Gulf of Mexico	NA	9	1984	-93.7333	19.6	10	Padilla et al. (1985)
Globicephala macrorhynchus	Gulf of Mexico	NA	9	1984	-96.7	20.8833	6	Padilla et al. (1985)
Globicephala macrorhynchus	Gulf of Mexico	NA	10	1984	-95.2333	19.0333	16	Sanchez et al. (1985)
Globicephala macrorhynchus	Gulf of Mexico	NA	2	1987	-90.0166	23.4	15	Fuentes-Allen et al. (1988)
Globicephala macrorhynchus	Gulf of Mexico	18	5	1990	-90.0666	27.0166	NA	NOAA (1990)
Globicephala macrorhynchus	Gulf of Mexico	24	5	1990	-88.9083	28.7083	NA	NOAA (1990)
Globicephala macrorhynchus	Gulf of Mexico	NA	7	1991	-96.4833	22.1333	25	Jefferson and Lynn (1994)
Globicephala macrorhynchus	Gulf of Mexico	22	1	1993	-93.4063	27.4343	16	NOAA (1993)
Globicephala macrorhynchus	Gulf of Mexico	22	1	1993	-93.4321	27.4591	17	NOAA (1993)
Globicephala macrorhynchus	Gulf of Mexico	6	5	1993	-95.5	27.1166	7	NOAA (1993)
Globicephala macrorhynchus	Gulf of Mexico	7	12	1993	-89.5038	27.7405	2	Jefferson (1995)
Globicephala macrorhynchus	Gulf of Mexico	10	12	1993	-92.1719	26.815	20	Jefferson (1995)
Globicephala macrorhynchus	Gulf of Mexico	10	5	1994	-92.9666	27.6166	15	NOAA (1994)
Globicephala macrorhynchus	Gulf of Mexico	28	1	1995	-95.0497	18.8997	3	Ortega-Ortiz et al. (1998)
Globicephala macrorhynchus	Gulf of Mexico	29	1	1995	-95.283	18.9833	20	Ortega-Ortiz et al. (1998)
Globicephala macrorhynchus	Gulf of Mexico	16	3	1995	-89.5163	23.6497	10	Ortega-Ortiz et al. (1998)
Globicephala macrorhynchus	Gulf of Mexico	15	4	1995	-93.8497	18.95	20	Ortega-Ortiz et al. (1998)
Globicephala macrorhynchus	Gulf of Mexico	21	4	1995	-96.1163	20.5666	15	Ortega-Ortiz et al. (1998)
Globicephala macrorhynchus	Gulf of Mexico	22	4	1995	-94.0163	19.05	2	Ortega-Ortiz et al. (1998)
Globicephala macrorhynchus	Gulf of Mexico	30	4	1995	-94.333	19.8997	20	Ortega-Ortiz et al. (1998)
Globicephala macrorhynchus	Gulf of Mexico	7	5	1995	-95.25	18.95	5	Ortega-Ortiz et al. (1998)
Globicephala macrorhynchus	Gulf of Mexico	27	5	1995	-92.4333	19.8	2	Ortega-Ortiz et al. (1998)
Globicephala macrorhynchus	Gulf of Mexico	11	6	1995	-94.833	18.6666	6	Ortega-Ortiz et al. (1998)
Globicephala macrorhynchus	Gulf of Mexico	15	6	1995	-94.95	18.8997	5	Ortega-Ortiz et al. (1998)
Globicephala macrorhynchus	Gulf of Mexico	20	6	1995	-94.6163	18.85	4	Ortega-Ortiz et al. (1998)
Globicephala macrorhynchus	Gulf of Mexico	21	6	1995	-96.6666	21.083	6	Ortega-Ortiz et al. (1998)
Globicephala macrorhynchus	Gulf of Mexico	23	6	1995	-94.6333	18.8666	8	Ortega-Ortiz et al. (1998)
Globicephala macrorhynchus	Gulf of Mexico	23	6	1995	-96.033	20.083	3	Ortega-Ortiz et al. (1998)
Globicephala macrorhynchus	Gulf of Mexico	27	7	1995	-92.6833	21.7163	2	Ortega-Ortiz et al. (1998)
Globicephala macrorhynchus	Gulf of Mexico	15	8	1995	-95.8497	20.4166	1	Ortega-Ortiz et al. (1998)
Globicephala macrorhynchus	Gulf of Mexico	30	8	1995	-95.3163	19.1166	NA	Ortega-Ortiz et al. (1998)
Globicephala macrorhynchus	Gulf of Mexico	3	9	1995	-94.1833	20.55	NA	Ortega-Ortiz et al. (1998)
Globicephala macrorhynchus	Gulf of Mexico	5	9	1995	-95.083	19.0663	10	Ortega-Ortiz et al. (1998)
Globicephala macrorhynchus	Gulf of Mexico	24	9	1995	-92.5163	19.8	30	Ortega-Ortiz et al. (1998)
Globicephala macrorhynchus	Gulf of Mexico	29	11	1995	-95.2663	20.6333	30	Ortega-Ortiz et al. (1998)
Globicephala macrorhynchus	Gulf of Mexico	6	12	1995	-90.4	20.85	4	Ortega-Ortiz et al. (1998)
Globicephala macrorhynchus	Gulf of Mexico	3	5	1997	-91.75	27.4333	39	NOAA (1997)
Globicephala macrorhynchus	Gulf of Mexico	15	5	1997	-89.0666	28.4166	85	NOAA (1997)
Globicephala macrorhynchus	Gulf of Mexico	23	5	1997	-92.2	26.5	3	NOAA (1997)
Globicephala macrorhynchus	Gulf of Mexico	23	5	1997	-92.7	26.5	10	NOAA (1997)
Globicephala macrorhynchus	Gulf of Mexico	20	3	1998	-94.4977	18.78	18	Ortega-Ortiz (2002)
Globicephala macrorhynchus	Gulf of Mexico	7	4	1998	-93.6408	21.1527	14	Ortega-Ortiz (2002)
Globicephala macrorhynchus	Gulf of Mexico	7	4	1998	-94.4547	21.1208	2	Ortega-Ortiz (2002)
Globicephala macrorhynchus	Gulf of Mexico	14	5	2000	-83.85	24.5	40	NOAA (2000)
Globicephala macrorhynchus	Gulf of Mexico	29	5	2000	-89.0666	28.45	25	NOAA (2000)
Globicephala macrorhynchus	Gulf of Mexico	24	5	2001	-92.8333	27.4833	23	NOAA (2001)
Globicephala macrorhynchus	Gulf of Mexico	24	5	2001	-95.95	27.5	8	NOAA (2001)
Globicephala macrorhynchus	Gulf of Mexico	25	5	2001	-94	27.5333	35	NOAA (2001)
Globicephala macrorhynchus	Gulf of Mexico	29	5	2001	-91.75	27.6333	20	NOAA (2001)
Globicephala macrorhynchus	Gulf of Mexico	2	7	2002	-88.4181	28.8565	6	Epperson (2013)
Globicephala macrorhynchus	Gulf of Mexico	4	7	2002	-89.3866	28.3528	10	Epperson (2013)
Globicephala macrorhynchus	Gulf of Mexico	6	7	2002	-89.2147	28.2278	10	Epperson (2013)
Globicephala macrorhynchus	Gulf of Mexico	1	6	2003	-94.7323	27.6067	6	Epperson (2013)
Globicephala macrorhynchus	Gulf of Mexico	6	6	2003	-92.9894	27.4331	3	Epperson (2013)
Globicephala macrorhynchus	Gulf of Mexico	16	6	2003	-88.8953	28.6892	18	Epperson (2013)
Globicephala macrorhynchus	Gulf of Mexico	20	6	2003	-91.0531	27.8365	5	Epperson (2013)
Globicephala macrorhynchus	Gulf of Mexico	28	6	2003	-93.0306	27.7272	10	Epperson (2013)
Globicephala macrorhynchus	Gulf of Mexico	10	7	2003	-89.7074	28.2886	3	Epperson (2013)
Globicephala macrorhynchus	Gulf of Mexico	10	7	2003	-89.6872	28.2844	10	Epperson (2013)
Globicephala macrorhynchus	Gulf of Mexico	11	7	2003	-88.9223	28.6483	15	Epperson (2013)
Globicephala macrorhynchus	Gulf of Mexico	11	7	2003	-88.9154	28.6475	25	Epperson (2013)
Globicephala macrorhynchus	Gulf of Mexico	11	7	2003	-88.7205	28.7496	20	Epperson (2013)
Globicephala macrorhynchus	Gulf of Mexico	5	7	2004	-89.66	28.17	15	Epperson (2013)
Globicephala macrorhynchus	Gulf of Mexico	8	7	2004	-89.68	28.16	5	Epperson (2013)
Globicephala macrorhynchus	Gulf of Mexico	4	7	2005	-87.65	29.23	20	Epperson (2013)
Globicephala macrorhynchus	Gulf of Mexico	29	1	2006	-95.6867	19.7567	20	Galindo et al. (2009)
Globicephala macrorhynchus	Gulf of Mexico	30	11	2007	-95.7223	27.4291	3	Holts et al. (2014)
Globicephala macrorhynchus	Gulf of Mexico	30	11	2007	-95.743	27.4909	13	Holts et al. (2014)
Globicephala macrorhynchus	Gulf of Mexico	NA	8	2015	-96.05	19.4	9	CiGOM (2018)
Globicephala macrorhynchus	Gulf of Mexico	NA	8	2015	-95.2	19	24	CiGOM (2018)
Globicephala macrorhynchus	Gulf of Mexico	NA	8	2016	-95.25	18.98	7	CiGOM (2018)
Globicephala macrorhynchus	Gulf of Mexico	NA	8	2016	-95.25	19.07	1	CiGOM (2018)
Globicephala macrorhynchus	Southeast U.S. Continental Shelf	12	6	1998	-77.4882	26.0219	4	Dunn (2013)
Globicephala macrorhynchus	Southeast U.S. Continental Shelf	1	4	2003	-77.3212	26.7651	4	Dunn (2013)
Globicephala macrorhynchus	Southeast U.S. Continental Shelf	26	6	2007	-76.1939	33.8619	35	McLellan (2013)
Globicephala macrorhynchus	Southeast U.S. Continental Shelf	26	5	2008	-76.276	33.8213	9	McLellan (2011)
Globicephala macrorhynchus	Southeast U.S. Continental Shelf	27	5	2008	-76.6557	33.5929	12	McLellan (2011)
Globicephala macrorhynchus	Southeast U.S. Continental Shelf	17	7	2008	-76.0752	33.8685	18	McLellan (2011)
Globicephala macrorhynchus	Southeast U.S. Continental Shelf	17	7	2008	-76.3804	33.7038	12	McLellan (2011)
Globicephala macrorhynchus	Southeast U.S. Continental Shelf	2	6	2009	-78.5908	26.3753	25	Dunn (2013)
Globicephala macrorhynchus	Southeast U.S. Continental Shelf	18	8	2009	-76.4981	33.4939	40	McLellan (2011)
Globicephala macrorhynchus	Southeast U.S. Continental Shelf	19	8	2009	-76.5371	33.3868	6	McLellan (2011)
Globicephala macrorhynchus	Southeast U.S. Continental Shelf	26	9	2009	-80.024	30.2083	15	Johnston and Swaim (2013)
Globicephala macrorhynchus	Southeast U.S. Continental Shelf	26	9	2009	-79.955	30.1821	50	Johnston and Swaim (2013)
Globicephala macrorhynchus	Southeast U.S. Continental Shelf	21	2	2010	-76.1929	33.757	23	McLellan (2011)
Globicephala macrorhynchus	Southeast U.S. Continental Shelf	2	4	2010	-79.8327	29.9645	5	McLellan (2012)
Globicephala macrorhynchus	Southeast U.S. Continental Shelf	10	6	2010	-79.9017	30.2456	35	Johnston and Swaim (2013)
Globicephala macrorhynchus	Southeast U.S. Continental Shelf	4	6	2010	-79.9587	30.1621	14	McLellan (2011)
Globicephala macrorhynchus	Southeast U.S. Continental Shelf	28	7	2010	-79.9045	30.4286	50	McLellan (2011)
Globicephala macrorhynchus	Southeast U.S. Continental Shelf	3	8	2010	-80.0585	30.2936	23	McLellan (2011)
Globicephala macrorhynchus	Southeast U.S. Continental Shelf	4	8	2010	-79.7615	30.0035	14	McLellan (2011)
Globicephala macrorhynchus	Southeast U.S. Continental Shelf	8	9	2010	-80.0337	30.1015	30	McLellan (2011)
Globicephala macrorhynchus	Southeast U.S. Continental Shelf	8	9	2010	-80.0781	29.958	20	McLellan (2011)
Globicephala macrorhynchus	Southeast U.S. Continental Shelf	9	9	2010	-80.002	30.3062	21	McLellan (2011)
Globicephala macrorhynchus	Southeast U.S. Continental Shelf	18	10	2010	-79.8942	30.1731	11	McLellan (2011)
Globicephala macrorhynchus	Southeast U.S. Continental Shelf	20	5	2011	-79.9975	30.3657	5	McLellan (2012)
Globicephala macrorhynchus	Southeast U.S. Continental Shelf	18	8	2011	-79.9306	30.029	13	McLellan (2012)
Globicephala macrorhynchus	Southeast U.S. Continental Shelf	12	6	2011	-77.9426	26.6337	17	Dunn (2013)
Globicephala macrorhynchus	Southeast U.S. Continental Shelf	17	5	2012	-79.7953	29.9712	8	McLellan (2014)
Globicephala macrorhynchus	Southeast U.S. Continental Shelf	17	5	2012	-79.7901	30.3997	2	McLellan (2014)
Globicephala macrorhynchus	Southeast U.S. Continental Shelf	17	5	2012	-79.9812	30.3582	2	McLellan (2014)
Globicephala macrorhynchus	Southeast U.S. Continental Shelf	21	9	2012	-75.5666	34.6698	5	McLellan (2014)
Globicephala macrorhynchus	Southeast U.S. Continental Shelf	10	5	2013	-79.7835	30	10	McLellan (2014)
Globicephala macrorhynchus	Southeast U.S. Continental Shelf	10	7	2014	-79.8479	30.5687	10	McLellan (2015)
Globicephala macrorhynchus	Southeast U.S. Continental Shelf	10	8	2014	-80.1816	30.0286	15	McLellan (2015)
Globicephala macrorhynchus	Southeast U.S. Continental Shelf	15	4	2015	-79.4203	30.4324	1	McLellan (2016)
Globicephala macrorhynchus	Southeast U.S. Continental Shelf	24	5	2016	-79.7905	30.148	25	McLellan (2017)
Globicephala macrorhynchus	Southeast U.S. Continental Shelf	9	5	2017	-79.6946	30.2921	3	McLellan (2018)
Globicephala macrorhynchus	Southeast U.S. Continental Shelf	9	5	2017	-79.6282	30.0198	4	McLellan (2018)
Globicephala macrorhynchus	Southeast U.S. Continental Shelf	9	5	2017	-79.6047	30.2354	12	McLellan (2018)
Globicephala macrorhynchus	Southeast U.S. Continental Shelf	9	5	2017	-79.7997	30.2333	3	McLellan (2018)
Globicephala macrorhynchus	Southeast U.S. Continental Shelf	9	5	2017	-79.5919	30.3733	7	McLellan (2018)
Globicephala macrorhynchus	Southeast U.S. Continental Shelf	9	5	2017	-79.7141	30.0938	1	McLellan (2018)
Globicephala macrorhynchus	Southeast U.S. Continental Shelf	11	7	2017	-79.4135	30.1011	17	McLellan (2018)
Globicephala macrorhynchus	Caribbean Sea	NA	6	1990	-65	11.7666	20	Romero et al. (2001)
Globicephala macrorhynchus	Caribbean Sea	2	7	1992	-68.7	12	60	Debrot (1998)
Globicephala macrorhynchus	Caribbean Sea	27	10	1992	-68.9833	12.1333	40	Debrot (1998)
Globicephala macrorhynchus	Caribbean Sea	23	6	1994	-76.8738	25.7338	25	Dunn (2013)
Globicephala macrorhynchus	Caribbean Sea	NA	2	1995	-62.6166	18.75	NA	Roden and Mullin (2000)
Globicephala macrorhynchus	Caribbean Sea	NA	2	1995	-64.3666	19	NA	Roden and Mullin (2000)
Globicephala macrorhynchus	Caribbean Sea	NA	2	1995	-65	19.25	NA	Roden and Mullin (2000)
Globicephala macrorhynchus	Caribbean Sea	NA	2	1995	-66.75	19.5	NA	Roden and Mullin (2000)
Globicephala macrorhynchus	Caribbean Sea	NA	2	1995	-67.25	19	NA	Roden and Mullin (2000)
Globicephala macrorhynchus	Caribbean Sea	NA	2	1995	-67.5	18.5	NA	Roden and Mullin (2000)
Globicephala macrorhynchus	Caribbean Sea	NA	2	1995	-68	18.3666	NA	Roden and Mullin (2000)
Globicephala macrorhynchus	Caribbean Sea	29	7	1995	-69.5	12.1333	40	Debrot et al. (1998)
Globicephala macrorhynchus	Caribbean Sea	21	2	1996	-78.0667	25.45	12	Dunn (2013)
Globicephala macrorhynchus	Caribbean Sea	15	3	1996	-68.6333	11.8333	50	Debrot (1998)
Globicephala macrorhynchus	Caribbean Sea	23	4	1996	-78.1667	25.5	20	Dunn (2013)
Globicephala macrorhynchus	Caribbean Sea	9	5	1996	-76.342	24.7847	6	Dunn (2013)
Globicephala macrorhynchus	Caribbean Sea	19	5	1996	-78.0542	25.4243	34	Dunn (2013)
Globicephala macrorhynchus	Caribbean Sea	18	2	1997	-69.0833	12.1666	20	Debrot et al. (1998)
Globicephala macrorhynchus	Caribbean Sea	24	8	1997	-69.15	12.3166	35	Debrot et al. (1998)
Globicephala macrorhynchus	Caribbean Sea	12	2	1998	-68.3	12.15	23	Debrot et al. (1998)
Globicephala macrorhynchus	Caribbean Sea	11	7	1998	-77.8637	25.3113	7	Dunn (2013)
Globicephala macrorhynchus	Caribbean Sea	4	5	1999	-73.3833	22.5333	12	Dunn (2013)
Globicephala macrorhynchus	Caribbean Sea	28	7	1999	-61.792	12.1091	2	Romero (2014)
Globicephala macrorhynchus	Caribbean Sea	21	3	2000	-77.2996	25.8847	5	Dunn (2013)
Globicephala macrorhynchus	Caribbean Sea	11	2	2001	-77.65	24.6833	19	Swartz et al. (2002)
Globicephala macrorhynchus	Caribbean Sea	18	2	2001	-65.3	19.0166	7	Swartz et al. (2002)
Globicephala macrorhynchus	Caribbean Sea	23	2	2001	-65.0333	19.7666	10	Swartz et al. (2002)
Globicephala macrorhynchus	Caribbean Sea	1	3	2001	-67.1	17.55	6	Swartz et al. (2002)
Globicephala macrorhynchus	Caribbean Sea	4	3	2001	-67.5833	18.35	20	Swartz et al. (2002)
Globicephala macrorhynchus	Caribbean Sea	5	3	2001	-66.7166	18.6	15	Swartz et al. (2002)
Globicephala macrorhynchus	Caribbean Sea	6	3	2001	-66.7	18.6333	14	Swartz et al. (2002)
Globicephala macrorhynchus	Caribbean Sea	8	3	2001	-64.55	17.6666	9	Swartz et al. (2002)
Globicephala macrorhynchus	Caribbean Sea	8	3	2001	-77.2662	25.8547	3	Dunn (2013)
Globicephala macrorhynchus	Caribbean Sea	8	3	2001	-77.2644	25.8668	3	Dunn (2013)
Globicephala macrorhynchus	Caribbean Sea	31	12	2001	-77.4188	25.9746	15	Dunn (2013)
Globicephala macrorhynchus	Caribbean Sea	2	1	2003	-76.9002	25.2996	4	Dunn (2013)
Globicephala macrorhynchus	Caribbean Sea	13	2	2004	-75.4167	23.7167	45	Dunn (2013)
Globicephala macrorhynchus	Caribbean Sea	11	3	2004	-77.4638	25.9756	1	Dunn (2013)
Globicephala macrorhynchus	Caribbean Sea	NA	4	2004	-61.4	13.2	3	Yoshida et al. (2010)
Globicephala macrorhynchus	Caribbean Sea	NA	5	2004	-61.5	16.8	NA	Yoshida et al. (2010)
Globicephala macrorhynchus	Caribbean Sea	NA	5	2004	-62.2	18.3	25	Yoshida et al. (2010)
Globicephala macrorhynchus	Caribbean Sea	NA	4	2004	-67.5	11.8333	NA	Smultea et al. (2013)
Globicephala macrorhynchus	Caribbean Sea	NA	4	2004	-69.8	13.6	NA	Smultea et al. (2013)
Globicephala macrorhynchus	Caribbean Sea	NA	5	2004	-64	11.7	NA	Smultea et al. (2013)
Globicephala macrorhynchus	Caribbean Sea	4	1	2005	-74.0416	11.3583	60	Pardo and Palacios (2006)
Globicephala macrorhynchus	Caribbean Sea	4	1	2005	-74.2533	11.2166	30	Pardo and Palacios (2006)
Globicephala macrorhynchus	Caribbean Sea	27	1	2005	-61.46	15.27	NA	Gero and Whitehead
Globicephala macrorhynchus	Caribbean Sea	22	3	2005	-61.52	15.23	30	Gero and Whitehead
Globicephala macrorhynchus	Caribbean Sea	28	4	2005	-77.6036	24.5958	50	Dunn (2013)
Globicephala macrorhynchus	Caribbean Sea	7	6	2005	-78.0983	25.4408	14	Dunn (2013)
Globicephala macrorhynchus	Caribbean Sea	18	9	2005	-75.0286	19.8723	1	Whitt et al. (2011)
Globicephala macrorhynchus	Caribbean Sea	24	9	2005	-77.5103	24.689	2	Dunn (2013)
Globicephala macrorhynchus	Caribbean Sea	30	9	2005	-77.695	24.7384	60	Dunn (2013)
Globicephala macrorhynchus	Caribbean Sea	7	2	2006	-74.1132	11.3386	60	Jimenez-Pinedo et al. (2011)
Globicephala macrorhynchus	Caribbean Sea	17	8	2007	-77.5413	24.3316	35	Dunn (2013)
Globicephala macrorhynchus	Caribbean Sea	1	9	2007	-77.6043	24.5999	35	Dunn (2013)
Globicephala macrorhynchus	Caribbean Sea	16	9	2007	-77.5731	24.3139	30	Dunn (2013)
Globicephala macrorhynchus	Caribbean Sea	17	9	2007	-77.6266	24.5755	40	Dunn (2013)
Globicephala macrorhynchus	Caribbean Sea	17	2	2008	-61.249	14.6772	NA	Van Canneyt (2013)
Globicephala macrorhynchus	Caribbean Sea	17	2	2008	-61.2493	14.6782	NA	Van Canneyt (2013)
Globicephala macrorhynchus	Caribbean Sea	27	2	2008	-82.9387	11.1448	28	Holts et al. (2014)
Globicephala macrorhynchus	Caribbean Sea	27	2	2008	-82.9124	11.1701	5	Holts et al. (2014)
Globicephala macrorhynchus	Caribbean Sea	27	2	2008	-82.9338	11.1495	28	Holts et al. (2014)
Globicephala macrorhynchus	Caribbean Sea	27	2	2008	-82.9301	11.1531	28	Holts et al. (2014)
Globicephala macrorhynchus	Caribbean Sea	23	8	2008	-77.6367	24.6523	35	Dunn (2013)
Globicephala macrorhynchus	Caribbean Sea	22	9	2008	-77.5573	24.3183	25	Dunn (2013)
Globicephala macrorhynchus	Caribbean Sea	26	9	2008	-77.4862	24.2695	25	Dunn (2013)
Globicephala macrorhynchus	Caribbean Sea	29	9	2008	-77.5501	24.5818	14	Dunn (2013)
Globicephala macrorhynchus	Caribbean Sea	4	10	2009	-76.7217	24.9088	13	Dunn (2013)
Globicephala macrorhynchus	Caribbean Sea	26	10	2009	-77.5732	24.7253	30	Dunn (2013)
Globicephala macrorhynchus	Caribbean Sea	26	10	2009	-77.5557	24.6643	20	Dunn (2013)
Globicephala macrorhynchus	Caribbean Sea	5	11	2009	-77.4954	24.644	63	Dunn (2013)
Globicephala macrorhynchus	Caribbean Sea	5	11	2009	-77.4982	24.616	63	Dunn (2013)
Globicephala macrorhynchus	Caribbean Sea	30	4	2011	-77.7125	24.9165	22	Dunn (2013)
Globicephala macrorhynchus	Caribbean Sea	4	5	2011	-77.6282	24.6605	11	Dunn (2013)
Globicephala macrorhynchus	Caribbean Sea	1	4	2011	-87.9177	17.1473	9	Ramos (2012)
Globicephala macrorhynchus	Caribbean Sea	9	9	2017	-61.8775	14.453	NA	Van Canneyt (2013)
Globicephala macrorhynchus	Caribbean Sea	9	9	2017	-61.8775	14.453	NA	Van Canneyt (2013)
Globicephala macrorhynchus	Caribbean Sea	9	9	2017	-61.8818	14.4539	NA	Van Canneyt (2013)
Globicephala macrorhynchus	Caribbean Sea	9	9	2017	-61.8818	14.4539	NA	Van Canneyt (2013)
Globicephala macrorhynchus	Caribbean Sea	21	9	2017	-61.1492	15.4429	NA	Van Canneyt (2013)
Globicephala macrorhynchus	Caribbean Sea	21	9	2017	-61.1543	15.4536	NA	Van Canneyt (2013)
Globicephala macrorhynchus	Caribbean Sea	25	10	2017	-63.0382	17.6669	NA	Van Canneyt (2013)

## Sheet: Rough-toothed dolphin
Species	Locality	Day	Month	Year	Longitude	Latitude	Group size	Reference
Steno bredanensis	Gulf of Mexico	NA	5	1983	-92.7166	21.05	4	Urban and Aguayo (1983)
Steno bredanensis	Gulf of Mexico	NA	2	1987	-95.0166	20.5166	7	Fuentes-Allen et al. (1988)
Steno bredanensis	Gulf of Mexico	NA	2	1992	-93.1841	18.4513	20	Delgado-Estrella (1994)
Steno bredanensis	Gulf of Mexico	NA	3	1992	-93.0694	18.4413	65	Delgado-Estrella (1994)
Steno bredanensis	Gulf of Mexico	NA	3	1992	-93.1594	18.4577	25	Delgado-Estrella (1994)
Steno bredanensis	Gulf of Mexico	NA	5	1992	-96.033	23.7833	NA	Jefferson (1995)
Steno bredanensis	Gulf of Mexico	21	5	1992	-94.1188	26.0092	20	Garrison (2013)
Steno bredanensis	Gulf of Mexico	23	5	1992	-95.9778	27.6495	20	Garrison (2013)
Steno bredanensis	Gulf of Mexico	27	5	1992	-95.9813	26.5888	18	Garrison (2013)
Steno bredanensis	Gulf of Mexico	31	5	1992	-94.5093	27.7937	7	Garrison (2013)
Steno bredanensis	Gulf of Mexico	3	6	1992	-89.9317	27.5457	6	Garrison (2013)
Steno bredanensis	Gulf of Mexico	NA	NA	1993	-92.9166	18.4833	35	López-Hernández (1997)
Steno bredanensis	Gulf of Mexico	11	5	1993	-90.8472	26.3968	14	NOAA (1993)
Steno bredanensis	Gulf of Mexico	29	5	1993	-93.0167	27.8045	20	NOAA (1993)
Steno bredanensis	Gulf of Mexico	1	6	1993	-96.0087	26.0367	18	NOAA (1993)
Steno bredanensis	Gulf of Mexico	13	6	1993	-85.0628	26.7357	12	NOAA (1993)
Steno bredanensis	Gulf of Mexico	4	9	1993	-93.51	26.7147	14	Jefferson (1995)
Steno bredanensis	Gulf of Mexico	7	6	1994	-89.2002	28.3695	6	NOAA (1994)
Steno bredanensis	Gulf of Mexico	5	6	1994	-92.1783	27.1085	20	NOAA (1994)
Steno bredanensis	Gulf of Mexico	24	8	1994	-82.932	25.5515	17	NOAA (1994)
Steno bredanensis	Gulf of Mexico	31	8	1994	-83.5472	26.9213	33	NOAA (1997)
Steno bredanensis	Gulf of Mexico	NA	3	1995	-92.9166	21.1833	30	Ortega-Ortiz et al. (1998)
Steno bredanensis	Gulf of Mexico	NA	3	1995	-92.5487	21.2333	30	Ortega-Ortiz et al. (1998)
Steno bredanensis	Gulf of Mexico	NA	6	1995	-95.6833	19.0163	3	Ortega-Ortiz et al. (1998)
Steno bredanensis	Gulf of Mexico	NA	9	1995	-97.1666	20.9663	22	Ortega-Ortiz et al. (1998)
Steno bredanensis	Gulf of Mexico	22	4	1997	-86.9973	28.3188	6	NOAA (1997)
Steno bredanensis	Gulf of Mexico	11	5	1997	-86.9905	26.2253	30	NOAA (1997)
Steno bredanensis	Gulf of Mexico	2	6	1997	-86.1215	28.0592	2	NOAA (1997)
Steno bredanensis	Gulf of Mexico	NA	10	1997	-91.5869	21.9975	27	Ortega-Ortiz (2002)
Steno bredanensis	Gulf of Mexico	NA	6	1998	-95.5388	19.4258	9	Ortega-Ortiz (2002)
Steno bredanensis	Gulf of Mexico	19	5	1999	-85.9567	27.6628	6	Garrison (2013)
Steno bredanensis	Gulf of Mexico	22	5	1999	-88.0312	29.0125	18	Garrison (2013)
Steno bredanensis	Gulf of Mexico	24	5	1999	-89.605	25.9342	2	Garrison (2013)
Steno bredanensis	Gulf of Mexico	24	5	1999	-90.0107	26.0453	25	Garrison (2013)
Steno bredanensis	Gulf of Mexico	NA	7	1999	-93.0697	18.4216	60	Delgado-Estrella (2002)
Steno bredanensis	Gulf of Mexico	NA	7	1999	-93.2166	18.4216	20	Delgado-Estrella (2002)
Steno bredanensis	Gulf of Mexico	NA	7	1999	-93.3716	18.4216	10	Delgado-Estrella (2002)
Steno bredanensis	Gulf of Mexico	23	4	2000	-84.0012	24.0668	4	NOAA (2000)
Steno bredanensis	Gulf of Mexico	4	5	2000	-93.9402	26.2827	10	NOAA (2000)
Steno bredanensis	Gulf of Mexico	3	7	2000	-89.5053	27.9797	35	Garrison (2013)
Steno bredanensis	Gulf of Mexico	10	9	2000	-96.3238	28.0058	8	Garrison (2013)
Steno bredanensis	Gulf of Mexico	11	9	2000	-94.477	27.7472	6	Garrison (2013)
Steno bredanensis	Gulf of Mexico	18	4	2001	-85.4847	28.757	12	NOAA (2001)
Steno bredanensis	Gulf of Mexico	1	5	2001	-93.0005	26.4792	15	NOAA (2001)
Steno bredanensis	Gulf of Mexico	7	5	2001	-88.7292	28.7353	20	NOAA (2001)
Steno bredanensis	Gulf of Mexico	13	5	2001	-83.981	25.6015	28	NOAA (2001)
Steno bredanensis	Gulf of Mexico	1	9	2001	-96.8285	27.5387	20	NOAA (2001)
Steno bredanensis	Gulf of Mexico	20	9	2001	-85.4465	28.4982	11	NOAA (2001)
Steno bredanensis	Gulf of Mexico	29	6	2002	-86.5425	28.0897	1	Epperson (2013)
Steno bredanensis	Gulf of Mexico	3	7	2002	-88.6841	28.8602	20	Epperson (2013)
Steno bredanensis	Gulf of Mexico	22	6	2004	-86.22	27.98	12	Epperson (2013)
Steno bredanensis	Gulf of Mexico	17	6	2005	-95.1817	26.7137	10	Epperson (2013)
Steno bredanensis	Gulf of Mexico	17	6	2005	-95.1864	26.7131	10	Epperson (2013)
Steno bredanensis	Gulf of Mexico	22	6	2005	-96.1208	26.1503	12	Epperson (2013)
Steno bredanensis	Gulf of Mexico	22	6	2005	-96.1228	26.1427	12	Epperson (2013)
Steno bredanensis	Gulf of Mexico	29	6	2005	-96.0413	26.8145	17	Epperson (2013)
Steno bredanensis	Gulf of Mexico	NA	4	2008	-94.85	19.1	4	Vázquez-Castán et al. (2009)
Steno bredanensis	Southeast U.S. Continental Shelf	22	1	1992	-77.9095	33.4558	6	Garrison (2013)
Steno bredanensis	Southeast U.S. Continental Shelf	8	7	2001	-77.299	25.9158	13	Dunn (2013)
Steno bredanensis	Southeast U.S. Continental Shelf	25	4	2008	-76.2667	33.8061	26	McLellan (2011)
Steno bredanensis	Southeast U.S. Continental Shelf	24	6	2008	-76.5946	33.552	5	McLellan (2011)
Steno bredanensis	Southeast U.S. Continental Shelf	24	6	2008	-76.6647	33.5165	9	McLellan (2011)
Steno bredanensis	Southeast U.S. Continental Shelf	18	8	2009	-76.7086	33.6393	27	Urian (2013)
Steno bredanensis	Southeast U.S. Continental Shelf	15	9	2009	-80.6627	30.1026	50	McLellan (2011)
Steno bredanensis	Southeast U.S. Continental Shelf	28	7	2010	-80.3218	30.495	23	McLellan (2011)
Steno bredanensis	Southeast U.S. Continental Shelf	18	10	2010	-80.5126	30.0254	45	McLellan (2011)
Steno bredanensis	Southeast U.S. Continental Shelf	17	10	2011	-80.2278	30.5666	43	McLellan (2012)
Steno bredanensis	Southeast U.S. Continental Shelf	6	7	2012	-80.6808	30.0339	35	McLellan (2014)
Steno bredanensis	Southeast U.S. Continental Shelf	4	11	2012	-80.2952	29.9673	28	McLellan (2014)
Steno bredanensis	Southeast U.S. Continental Shelf	25	6	2014	-80.252	30.1594	20	McLellan (2015)
Steno bredanensis	Southeast U.S. Continental Shelf	3	3	2015	-80.4977	30.438	35	McLellan (2016)
Steno bredanensis	Southeast U.S. Continental Shelf	21	1	2016	-80.4837	30.2306	50	McLellan (2017)
Steno bredanensis	Southeast U.S. Continental Shelf	12	7	2017	-80.4936	30.2197	36	McLellan (2018)
Steno bredanensis	Caribbean Sea	25	3	1991	-77.0667	25.6833	7	Dunn (2013)
Steno bredanensis	Caribbean Sea	26	5	1996	-76.5652	25.5972	12	Dunn (2013)
Steno bredanensis	Caribbean Sea	28	2	2000	-60.789	10.4278	99	Garrison (2013)
Steno bredanensis	Caribbean Sea	5	3	2000	-60.5685	10.8622	8	Garrison (2013)
Steno bredanensis	Caribbean Sea	30	3	2000	-61.8721	16.2011	15	Boisseau (2014)
Steno bredanensis	Caribbean Sea	4	9	2000	-65.2772	18.1452	29	DiMatteo (2013)
Steno bredanensis	Caribbean Sea	18	2	2001	-65.45	19.2333	3	Swartz et al. (2001)
Steno bredanensis	Caribbean Sea	29	9	2005	-77.4316	24.5488	20	Dunn (2013)
Steno bredanensis	Caribbean Sea	30	9	2005	-77.6956	24.7386	15	Dunn (2013)
Steno bredanensis	Caribbean Sea	30	9	2005	-77.6908	24.7465	13	Dunn (2013)
Steno bredanensis	Caribbean Sea	22	2	2006	-73.9833	11.3455	35	Jimenez-Pinedo et al. (2011)
Steno bredanensis	Caribbean Sea	NA	1	2009	-54.2	6.8333	NA	de Boer (2015)
Steno bredanensis	Caribbean Sea	26	10	2009	-77.5557	24.6643	25	Dunn (2013)
Steno bredanensis	Caribbean Sea	5	11	2009	-77.4982	24.616	20	Dunn (2013)
Steno bredanensis	Caribbean Sea	15	6	2011	-77.4299	24.1555	12	Dunn (2013)
Steno bredanensis	Caribbean Sea	1	7	2012	-54.2166	8	40	de Boer (2015)
Steno bredanensis	Caribbean Sea	24	8	2012	-54.35	8.4166	25	de Boer (2015)

## Sheet: Risso's dolphin
Species	Locality	Day	Month	Year	Longitude	Latitude	Group size	Reference
Grampus griseus	Gulf of Mexico	18	5	1990	-90.1555	27.0444	NA	NOAA (1990)
Grampus griseus	Gulf of Mexico	22	5	1990	-89.9027	28.1305	NA	NOAA (1990)
Grampus griseus	Gulf of Mexico	22	5	1990	-89.8805	28.1388	NA	NOAA (1990)
Grampus griseus	Gulf of Mexico	22	5	1990	-89.8388	28.2083	NA	NOAA (1990)
Grampus griseus	Gulf of Mexico	22	5	1990	-89.7916	28.2861	NA	NOAA (1990)
Grampus griseus	Gulf of Mexico	24	5	1990	-88.725	28.8388	NA	NOAA (1990)
Grampus griseus	Gulf of Mexico	24	4	1992	-92.8444	26.3666	1	Jefferson (1995)
Grampus griseus	Gulf of Mexico	3	5	1992	-90.3477	27.9445	8	Garrison (2013)
Grampus griseus	Gulf of Mexico	3	5	1992	-90.0958	27.9948	13	Garrison (2013)
Grampus griseus	Gulf of Mexico	3	5	1992	-90.3947	27.952	17	Garrison (2013)
Grampus griseus	Gulf of Mexico	9	5	1992	-86.0242	28.0528	7	Garrison (2013)
Grampus griseus	Gulf of Mexico	12	5	1992	-88.037	29.1462	9	Garrison (2013)
Grampus griseus	Gulf of Mexico	12	5	1992	-88.0385	29.1323	6	Garrison (2013)
Grampus griseus	Gulf of Mexico	12	5	1992	-88.0302	29.183	8	Garrison (2013)
Grampus griseus	Gulf of Mexico	12	5	1992	-87.638	29.3092	11	Garrison (2013)
Grampus griseus	Gulf of Mexico	13	5	1992	-88.007	26.5355	5	Garrison (2013)
Grampus griseus	Gulf of Mexico	14	5	1992	-89.0292	27.977	7	Garrison (2013)
Grampus griseus	Gulf of Mexico	14	5	1992	-89.017	27.8727	7	Garrison (2013)
Grampus griseus	Gulf of Mexico	15	5	1992	-89.458	28.4962	18	Garrison (2013)
Grampus griseus	Gulf of Mexico	15	5	1992	-89.1353	28.6557	4	Garrison (2013)
Grampus griseus	Gulf of Mexico	15	5	1992	-89.503	28.4708	10	Garrison (2013)
Grampus griseus	Gulf of Mexico	15	5	1992	-88.7133	28.8748	8	Garrison (2013)
Grampus griseus	Gulf of Mexico	15	5	1992	-89.0288	28.7228	6	Garrison (2013)
Grampus griseus	Gulf of Mexico	18	5	1992	-91.0287	26.7435	9	Garrison (2013)
Grampus griseus	Gulf of Mexico	24	5	1992	-95.558	27.6247	6	Garrison (2013)
Grampus griseus	Gulf of Mexico	24	5	1992	-94.6605	27.6447	2	Garrison (2013)
Grampus griseus	Gulf of Mexico	29	5	1992	-94.5027	27.626	2	Garrison (2013)
Grampus griseus	Gulf of Mexico	3	6	1992	-89.8065	28.5067	14	Garrison (2013)
Grampus griseus	Gulf of Mexico	4	6	1992	-90.985	26.7847	20	Garrison (2013)
Grampus griseus	Gulf of Mexico	6	6	1992	-88.9898	28.8303	6	Garrison (2013)
Grampus griseus	Gulf of Mexico	6	6	1992	-89.0183	28.7127	6	Garrison (2013)
Grampus griseus	Gulf of Mexico	9	5	1993	-92.7387	27.7743	2	NOAA (1993)
Grampus griseus	Gulf of Mexico	9	5	1993	-92.7373	27.7637	1	NOAA (1993)
Grampus griseus	Gulf of Mexico	14	5	1993	-88.9878	28.6385	14	NOAA (1993)
Grampus griseus	Gulf of Mexico	14	5	1993	-88.9737	28.7348	13	NOAA (1993)
Grampus griseus	Gulf of Mexico	15	5	1993	-88.0282	28.4957	2	NOAA (1993)
Grampus griseus	Gulf of Mexico	15	5	1993	-88.0188	28.0093	6	NOAA (1993)
Grampus griseus	Gulf of Mexico	15	5	1993	-88.0072	29.2283	6	NOAA (1993)
Grampus griseus	Gulf of Mexico	19	5	1993	-85.5545	28.4998	6	NOAA (1993)
Grampus griseus	Gulf of Mexico	19	5	1993	-85.9407	28.946	6	NOAA (1993)
Grampus griseus	Gulf of Mexico	19	5	1993	-86.355	29.0043	5	NOAA (1993)
Grampus griseus	Gulf of Mexico	20	5	1993	-85.975	26.8742	8	NOAA (1993)
Grampus griseus	Gulf of Mexico	30	5	1993	-93.9975	26.0277	21	NOAA (1993)
Grampus griseus	Gulf of Mexico	31	5	1993	-93.505	26.4072	1	Jefferson (1995)
Grampus griseus	Gulf of Mexico	2	6	1993	-94.1744	26.3441	6	Jefferson (1995)
Grampus griseus	Gulf of Mexico	2	9	1993	-92.168	26.7972	9	Jefferson (1995)
Grampus griseus	Gulf of Mexico	3	9	1993	-92.8355	27.7294	35	Jefferson (1995)
Grampus griseus	Gulf of Mexico	13	6	1993	-84.9973	27.4087	10	NOAA (1993)
Grampus griseus	Gulf of Mexico	13	6	1993	-85.0095	27.1105	12	NOAA (1993)
Grampus griseus	Gulf of Mexico	14	6	1993	-86.7607	28.9915	6	NOAA (1993)
Grampus griseus	Gulf of Mexico	17	4	1994	-90.0033	27.4567	12	NOAA (1994)
Grampus griseus	Gulf of Mexico	19	4	1994	-88.9832	28.6762	7	NOAA (1994)
Grampus griseus	Gulf of Mexico	21	4	1994	-88.0052	28.5952	11	NOAA (1994)
Grampus griseus	Gulf of Mexico	4	5	1994	-87.515	25.9832	15	NOAA (1994)
Grampus griseus	Gulf of Mexico	4	5	1994	-87.7225	26.0337	4	NOAA (1994)
Grampus griseus	Gulf of Mexico	4	5	1994	-87.6978	26.0138	8	NOAA (1994)
Grampus griseus	Gulf of Mexico	5	5	1994	-88.4397	29.0397	6	NOAA (1994)
Grampus griseus	Gulf of Mexico	6	5	1994	-89.0208	27.1662	12	NOAA (1994)
Grampus griseus	Gulf of Mexico	8	5	1994	-90.942	27.3935	4	NOAA (1994)
Grampus griseus	Gulf of Mexico	9	5	1994	-92.0333	26.298	8	NOAA (1994)
Grampus griseus	Gulf of Mexico	11	5	1994	-93.1973	26.1647	2	NOAA (1994)
Grampus griseus	Gulf of Mexico	15	5	1994	-89.0752	27.4947	6	NOAA (1994)
Grampus griseus	Gulf of Mexico	16	5	1994	-85.2117	27.3362	2	NOAA (1994)
Grampus griseus	Gulf of Mexico	16	5	1994	-85.0763	27.0898	17	NOAA (1994)
Grampus griseus	Gulf of Mexico	16	5	1994	-85.0932	27.0098	12	NOAA (1994)
Grampus griseus	Gulf of Mexico	16	5	1994	-85.0768	27.0995	15	NOAA (1994)
Grampus griseus	Gulf of Mexico	17	5	1994	-84.1998	24.7883	23	NOAA (1994)
Grampus griseus	Gulf of Mexico	17	5	1994	-84.5405	25.1673	6	NOAA (1994)
Grampus griseus	Gulf of Mexico	17	5	1994	-84.0048	24.6262	25	NOAA (1994)
Grampus griseus	Gulf of Mexico	17	5	1994	-84.2012	24.7918	10	NOAA (1994)
Grampus griseus	Gulf of Mexico	17	5	1994	-84.0487	24.6037	15	NOAA (1994)
Grampus griseus	Gulf of Mexico	17	5	1994	-84.2	24.7907	10	NOAA (1994)
Grampus griseus	Gulf of Mexico	17	5	1994	-84.0305	24.707	30	NOAA (1994)
Grampus griseus	Gulf of Mexico	17	5	1994	-84.0442	24.7222	20	NOAA (1994)
Grampus griseus	Gulf of Mexico	17	5	1994	-84.4975	24.9575	8	NOAA (1994)
Grampus griseus	Gulf of Mexico	17	5	1994	-84.0495	24.7335	12	NOAA (1994)
Grampus griseus	Gulf of Mexico	28	5	1994	-84.8762	26.7208	5	NOAA (1994)
Grampus griseus	Gulf of Mexico	28	5	1994	-84.8962	26.7503	40	NOAA (1994)
Grampus griseus	Gulf of Mexico	28	5	1994	-84.7457	26.3383	9	NOAA (1994)
Grampus griseus	Gulf of Mexico	28	5	1994	-84.8793	26.6622	10	NOAA (1994)
Grampus griseus	Gulf of Mexico	28	5	1994	-84.7607	26.1242	17	NOAA (1994)
Grampus griseus	Gulf of Mexico	28	5	1994	-84.7453	26.3585	18	NOAA (1994)
Grampus griseus	Gulf of Mexico	28	5	1994	-84.7738	26.1565	25	NOAA (1994)
Grampus griseus	Gulf of Mexico	31	5	1994	-93.275	27.1133	3	NOAA (1994)
Grampus griseus	Gulf of Mexico	6	6	1994	-91.2353	26.4608	6	NOAA (1994)
Grampus griseus	Gulf of Mexico	7	6	1994	-88.8255	28.7137	3	NOAA (1994)
Grampus griseus	Gulf of Mexico	7	6	1994	-89.0125	28.5518	5	NOAA (1994)
Grampus griseus	Gulf of Mexico	8	6	1994	-88.4763	29.0122	20	NOAA (1994)
Grampus griseus	Gulf of Mexico	9	6	1994	-89.5737	28.4038	8	NOAA (1994)
Grampus griseus	Gulf of Mexico	21	8	1994	-84.607	26.0185	23	NOAA (1994)
Grampus griseus	Gulf of Mexico	22	8	1994	-84.8707	25.4427	10	NOAA (1994)
Grampus griseus	Gulf of Mexico	24	8	1994	-83.75	24.4045	7	NOAA (1994)
Grampus griseus	Gulf of Mexico	24	8	1994	-83.7187	24.4422	8	NOAA (1994)
Grampus griseus	Gulf of Mexico	24	8	1994	-83.7557	24.3758	9	NOAA (1994)
Grampus griseus	Gulf of Mexico	24	8	1994	-83.6977	24.4858	5	NOAA (1994)
Grampus griseus	Gulf of Mexico	24	8	1994	-83.6888	24.5388	10	NOAA (1994)
Grampus griseus	Gulf of Mexico	24	8	1994	-83.7688	24.3457	10	NOAA (1994)
Grampus griseus	Gulf of Mexico	24	8	1994	-83.7508	24.4065	1	NOAA (1994)
Grampus griseus	Gulf of Mexico	25	8	1994	-83.839	24.1935	6	NOAA (1994)
Grampus griseus	Gulf of Mexico	7	9	1994	-87.5403	28.8295	23	NOAA (1994)
Grampus griseus	Gulf of Mexico	22	4	1996	-86.7728	29.0155	2	Garrison (2013)
Grampus griseus	Gulf of Mexico	25	4	1996	-89.0098	28.7578	3	Garrison (2013)
Grampus griseus	Gulf of Mexico	25	4	1996	-89.0035	28.7143	3	Garrison (2013)
Grampus griseus	Gulf of Mexico	25	4	1996	-88.6265	28.9928	8	Garrison (2013)
Grampus griseus	Gulf of Mexico	3	5	1996	-92.5662	28.0022	3	Garrison (2013)
Grampus griseus	Gulf of Mexico	9	5	1996	-85.0085	26.182	9	Garrison (2013)
Grampus griseus	Gulf of Mexico	12	5	1996	-83.516	24.4118	7	Garrison (2013)
Grampus griseus	Gulf of Mexico	13	5	1996	-85.8543	25.0105	15	Garrison (2013)
Grampus griseus	Gulf of Mexico	13	5	1996	-85.9127	25.019	6	Garrison (2013)
Grampus griseus	Gulf of Mexico	13	5	1996	-85.9842	25.0442	4	Garrison (2013)
Grampus griseus	Gulf of Mexico	14	5	1996	-86.0078	26.6713	4	Garrison (2013)
Grampus griseus	Gulf of Mexico	18	5	1996	-88.5403	28.9835	24	Garrison (2013)
Grampus griseus	Gulf of Mexico	18	5	1996	-88.9987	28.731	4	Garrison (2013)
Grampus griseus	Gulf of Mexico	20	5	1996	-90.007	27.3772	20	Garrison (2013)
Grampus griseus	Gulf of Mexico	22	5	1996	-92.0395	27.1883	10	Garrison (2013)
Grampus griseus	Gulf of Mexico	22	5	1996	-91.996	26.7108	12	Garrison (2013)
Grampus griseus	Gulf of Mexico	23	5	1996	-93.0152	26.2807	4	Garrison (2013)
Grampus griseus	Gulf of Mexico	25	5	1996	-89.5868	28.4537	2	Garrison (2013)
Grampus griseus	Gulf of Mexico	25	5	1996	-88.8423	28.8527	8	Garrison (2013)
Grampus griseus	Gulf of Mexico	25	5	1996	-89.0475	28.6325	8	Garrison (2013)
Grampus griseus	Gulf of Mexico	25	5	1996	-89.4733	28.4728	6	Garrison (2013)
Grampus griseus	Gulf of Mexico	5	6	1996	-86.6617	28.6107	8	Garrison (2013)
Grampus griseus	Gulf of Mexico	5	6	1996	-86.6445	28.7632	6	Garrison (2013)
Grampus griseus	Gulf of Mexico	5	6	1996	-86.6312	28.6688	10	Garrison (2013)
Grampus griseus	Gulf of Mexico	5	6	1996	-86.6115	29.094	20	Garrison (2013)
Grampus griseus	Gulf of Mexico	5	6	1996	-86.6507	29.002	12	Garrison (2013)
Grampus griseus	Gulf of Mexico	5	6	1996	-86.7593	28.1998	15	Garrison (2013)
Grampus griseus	Gulf of Mexico	5	6	1996	-86.6498	28.5522	8	Garrison (2013)
Grampus griseus	Gulf of Mexico	5	6	1996	-86.6428	28.5937	4	Garrison (2013)
Grampus griseus	Gulf of Mexico	6	6	1996	-86.904	29.5518	15	Garrison (2013)
Grampus griseus	Gulf of Mexico	6	6	1996	-86.9225	29.1415	7	Garrison (2013)
Grampus griseus	Gulf of Mexico	19	4	1997	-84.0005	24.5723	4	NOAA (1997)
Grampus griseus	Gulf of Mexico	19	4	1997	-84.1667	24.5087	4	NOAA (1997)
Grampus griseus	Gulf of Mexico	19	4	1997	-84.1545	24.4848	12	NOAA (1997)
Grampus griseus	Gulf of Mexico	19	4	1997	-84.3675	24.5147	11	NOAA (1997)
Grampus griseus	Gulf of Mexico	20	4	1997	-86.1558	25.509	10	NOAA (1997)
Grampus griseus	Gulf of Mexico	20	4	1997	-86.2978	25.5273	3	NOAA (1997)
Grampus griseus	Gulf of Mexico	3	5	1997	-91.9577	27.668	22	NOAA (1997)
Grampus griseus	Gulf of Mexico	3	5	1997	-91.498	27.396	7	NOAA (1997)
Grampus griseus	Gulf of Mexico	9	5	1997	-86.4065	29.0482	7	NOAA (1997)
Grampus griseus	Gulf of Mexico	12	5	1997	-86.981	28.9788	2	NOAA (1997)
Grampus griseus	Gulf of Mexico	15	5	1997	-89.3992	28.0277	25	NOAA (1997)
Grampus griseus	Gulf of Mexico	25	5	1997	-88.511	28.7507	11	NOAA (1997)
Grampus griseus	Gulf of Mexico	25	5	1997	-89.3352	28.4995	2	NOAA (1997)
Grampus griseus	Gulf of Mexico	25	5	1997	-89.4053	28.4338	4	NOAA (1997)
Grampus griseus	Gulf of Mexico	25	5	1997	-88.9062	28.7758	3	NOAA (1997)
Grampus griseus	Gulf of Mexico	25	5	1997	-88.9278	28.7727	25	NOAA (1997)
Grampus griseus	Gulf of Mexico	22	6	1997	-85.9613	28.3418	3	NOAA (1997)
Grampus griseus	Gulf of Mexico	4	6	1997	-86.591	29.4808	7	NOAA (1997)
Grampus griseus	Gulf of Mexico	9	6	1997	-88.9642	28.7375	3	NOAA (1997)
Grampus griseus	Gulf of Mexico	24	4	1999	-85.0023	27.1058	7	Garrison (2013)
Grampus griseus	Gulf of Mexico	15	5	1999	-84.71	25.9695	8	Garrison (2013)
Grampus griseus	Gulf of Mexico	16	5	1999	-83.6528	24.5082	9	Garrison (2013)
Grampus griseus	Gulf of Mexico	16	5	1999	-83.6802	24.5547	18	Garrison (2013)
Grampus griseus	Gulf of Mexico	16	5	1999	-83.9233	24.7058	12	Garrison (2013)
Grampus griseus	Gulf of Mexico	21	5	1999	-88.0105	25.9977	15	Garrison (2013)
Grampus griseus	Gulf of Mexico	22	5	1999	-88.0365	29.1065	20	Garrison (2013)
Grampus griseus	Gulf of Mexico	23	5	1999	-89.0453	27.1382	6	Garrison (2013)
Grampus griseus	Gulf of Mexico	26	5	1999	-92.0117	26.3117	12	Garrison (2013)
Grampus griseus	Gulf of Mexico	26	4	2000	-86.3553	28.7683	6	NOAA (2000)
Grampus griseus	Gulf of Mexico	26	4	2000	-86.2843	28.676	7	NOAA (2000)
Grampus griseus	Gulf of Mexico	26	4	2000	-86.2543	28.64	12	NOAA (2000)
Grampus griseus	Gulf of Mexico	26	4	2000	-86.4065	28.8322	7	NOAA (2000)
Grampus griseus	Gulf of Mexico	26	4	2000	-86.1722	28.6293	3	NOAA (2000)
Grampus griseus	Gulf of Mexico	29	4	2000	-89.0147	27.6417	9	NOAA (2000)
Grampus griseus	Gulf of Mexico	13	5	2000	-84.9808	26.2982	10	NOAA (2000)
Grampus griseus	Gulf of Mexico	17	5	2000	-86.2057	28.6732	5	NOAA (2000)
Grampus griseus	Gulf of Mexico	22	5	2000	-90.095	27.559	18	NOAA (2000)
Grampus griseus	Gulf of Mexico	22	5	2000	-90.01	28.0405	7	NOAA (2000)
Grampus griseus	Gulf of Mexico	2	7	2000	-89.2407	28.1275	23	NOAA (2000)
Grampus griseus	Gulf of Mexico	3	7	2000	-89.076	27.9213	14	NOAA (2000)
Grampus griseus	Gulf of Mexico	26	7	2000	-87.4382	29.1653	10	NOAA (2000)
Grampus griseus	Gulf of Mexico	23	4	2001	-86.4558	28.9547	5	NOAA (2001)
Grampus griseus	Gulf of Mexico	23	4	2001	-86.0525	28.5872	3	NOAA (2001)
Grampus griseus	Gulf of Mexico	3	5	2001	-94.9997	27.7438	10	NOAA (2001)
Grampus griseus	Gulf of Mexico	7	5	2001	-89.0342	28.6255	15	NOAA (2001)
Grampus griseus	Gulf of Mexico	11	5	2001	-86.0565	28.6737	4	NOAA (2001)
Grampus griseus	Gulf of Mexico	12	5	2001	-84.9922	26.7898	5	NOAA (2001)
Grampus griseus	Gulf of Mexico	13	5	2001	-83.969	24.6665	8	NOAA (2001)
Grampus griseus	Gulf of Mexico	16	5	2001	-85.9605	27.4303	20	NOAA (2001)
Grampus griseus	Gulf of Mexico	17	5	2001	-87.0677	27.456	5	NOAA (2001)
Grampus griseus	Gulf of Mexico	17	5	2001	-86.956	27.722	23	NOAA (2001)
Grampus griseus	Gulf of Mexico	21	5	2001	-89.9972	26.7432	4	NOAA (2001)
Grampus griseus	Gulf of Mexico	24	5	2001	-93.0985	26.4442	15	NOAA (2001)
Grampus griseus	Gulf of Mexico	25	5	2001	-93.9967	26.2855	2	NOAA (2001)
Grampus griseus	Gulf of Mexico	30	5	2001	-88.3635	28.0595	20	NOAA (2001)
Grampus griseus	Gulf of Mexico	11	7	2003	-89.0198	28.6335	5	Epperson (2013)
Grampus griseus	Gulf of Mexico	5	6	2004	-88.8589	28.7502	8	Epperson (2013)
Grampus griseus	Gulf of Mexico	12	6	2004	-88.8205	28.7695	20	Epperson (2013)
Grampus griseus	Gulf of Mexico	12	6	2004	-88.8183	28.7708	2	Epperson (2013)
Grampus griseus	Gulf of Mexico	12	6	2004	-88.7158	28.7655	6	Epperson (2013)
Grampus griseus	Gulf of Mexico	12	6	2004	-88.9173	28.7334	2	Epperson (2013)
Grampus griseus	Gulf of Mexico	16	6	2005	-94.3694	27.1988	4	Epperson (2013)
Grampus griseus	Gulf of Mexico	16	6	2005	-94.3667	27.2049	4	Epperson (2013)
Grampus griseus	Gulf of Mexico	16	6	2005	-94.3731	27.1907	4	Epperson (2013)
Grampus griseus	Gulf of Mexico	19	6	2005	-88.35	28.99	6	Epperson (2013)
Grampus griseus	Gulf of Mexico	19	6	2005	-88.44	28.98	6	Epperson (2013)
Grampus griseus	Gulf of Mexico	NA	8	2015	-95.98	19.5	40	CiGOM (2018)
Grampus griseus	Gulf of Mexico	NA	8	2016	-95.41	18.92	4	CiGOM (2018)
Grampus griseus	Gulf of Mexico	NA	8	2016	-95.08	18.77	3	CiGOM (2018)
Grampus griseus	Southeast U.S. Continental Shelf	29	5	1980	-79.85	29.167	5	Kenney (2013)
Grampus griseus	Southeast U.S. Continental Shelf	1	4	1992	-76.95	26.493	6	Dunn (2013)
Grampus griseus	Southeast U.S. Continental Shelf	1	4	1992	-76.921	26.4972	2	Dunn (2013)
Grampus griseus	Southeast U.S. Continental Shelf	29	1	1994	-77.3768	26.9003	16	Dunn (2013)
Grampus griseus	Southeast U.S. Continental Shelf	28	1	1995	-76.8723	26.5603	17	Dunn (2013)
Grampus griseus	Southeast U.S. Continental Shelf	10	3	1997	-78.1787	27.2513	6	Dunn (2013)
Grampus griseus	Southeast U.S. Continental Shelf	27	4	1998	-77.0387	26.693	20	Dunn (2013)
Grampus griseus	Southeast U.S. Continental Shelf	19	7	1998	-80.0822	29.704	30	Garrison (2013)
Grampus griseus	Southeast U.S. Continental Shelf	20	7	1998	-79.1838	28.6115	7	Garrison (2013)
Grampus griseus	Southeast U.S. Continental Shelf	20	7	1998	-79.0372	28.7165	4	Garrison (2013)
Grampus griseus	Southeast U.S. Continental Shelf	20	7	1998	-79.5243	28.4142	17	Garrison (2013)
Grampus griseus	Southeast U.S. Continental Shelf	22	7	1998	-79.421	30.6663	3	Garrison (2013)
Grampus griseus	Southeast U.S. Continental Shelf	22	7	1998	-79.2767	30.596	17	Garrison (2013)
Grampus griseus	Southeast U.S. Continental Shelf	22	7	1998	-79.364	30.6033	7	Garrison (2013)
Grampus griseus	Southeast U.S. Continental Shelf	11	8	1998	-77.5442	32.5143	40	Garrison (2013)
Grampus griseus	Southeast U.S. Continental Shelf	11	8	1998	-77.8528	32.5893	26	Garrison (2013)
Grampus griseus	Southeast U.S. Continental Shelf	11	8	1998	-77.6185	32.5173	75	Garrison (2013)
Grampus griseus	Southeast U.S. Continental Shelf	11	8	1998	-77.7135	32.5345	9	Garrison (2013)
Grampus griseus	Southeast U.S. Continental Shelf	11	8	1998	-77.2653	32.4092	13	Garrison (2013)
Grampus griseus	Southeast U.S. Continental Shelf	11	8	1998	-77.4522	32.4988	11	Garrison (2013)
Grampus griseus	Southeast U.S. Continental Shelf	11	8	1998	-77.301	32.4188	4	Garrison (2013)
Grampus griseus	Southeast U.S. Continental Shelf	14	8	1998	-79.8858	30.039	6	Garrison (2013)
Grampus griseus	Southeast U.S. Continental Shelf	14	8	1998	-79.302	30.1798	9	Garrison (2013)
Grampus griseus	Southeast U.S. Continental Shelf	25	5	1999	-76.6193	33.4533	15	McLellan (2005)
Grampus griseus	Southeast U.S. Continental Shelf	7	7	1999	-76.6683	33.6199	10	McLellan (2005)
Grampus griseus	Southeast U.S. Continental Shelf	8	7	1999	-76.261	33.7881	3	McLellan (2005)
Grampus griseus	Southeast U.S. Continental Shelf	11	8	1999	-79.94	30.574	8	Garrison (2013)
Grampus griseus	Southeast U.S. Continental Shelf	13	8	1999	-79.1347	31.9302	11	Garrison (2013)
Grampus griseus	Southeast U.S. Continental Shelf	14	8	1999	-79.0622	31.9438	17	Garrison (2013)
Grampus griseus	Southeast U.S. Continental Shelf	14	8	1999	-78.7522	32.0237	2	Garrison (2013)
Grampus griseus	Southeast U.S. Continental Shelf	14	8	1999	-78.6707	32.061	4	Garrison (2013)
Grampus griseus	Southeast U.S. Continental Shelf	14	8	1999	-78.7332	32.0385	4	Garrison (2013)
Grampus griseus	Southeast U.S. Continental Shelf	14	8	1999	-78.6298	32.0827	4	Garrison (2013)
Grampus griseus	Southeast U.S. Continental Shelf	17	8	1999	-76.7292	33.3888	8	Garrison (2013)
Grampus griseus	Southeast U.S. Continental Shelf	23	9	1999	-79.0485	31.7692	31	Garrison (2013)
Grampus griseus	Southeast U.S. Continental Shelf	5	5	1999	-76.9623	26.4891	20	Dunn (2013)
Grampus griseus	Southeast U.S. Continental Shelf	27	5	1999	-76.9481	26.6387	35	Dunn (2013)
Grampus griseus	Southeast U.S. Continental Shelf	3	9	2000	-78.6333	31.3917	1	Diaz (2011)
Grampus griseus	Southeast U.S. Continental Shelf	2	3	2001	-76.9531	26.4852	8	Dunn (2013)
Grampus griseus	Southeast U.S. Continental Shelf	13	9	2001	-79.1583	31.225	1	Diaz (2011)
Grampus griseus	Southeast U.S. Continental Shelf	27	5	2008	-76.5089	33.5959	5	McLellan (2011)
Grampus griseus	Southeast U.S. Continental Shelf	25	6	2008	-76.038	33.8318	10	McLellan (2011)
Grampus griseus	Southeast U.S. Continental Shelf	25	6	2008	-76.5071	33.5933	5	McLellan (2011)
Grampus griseus	Southeast U.S. Continental Shelf	25	6	2008	-76.0999	33.8759	20	Urian (2013)
Grampus griseus	Southeast U.S. Continental Shelf	25	6	2008	-76.0273	33.8208	43	Urian (2013)
Grampus griseus	Southeast U.S. Continental Shelf	25	6	2008	-76.0557	33.8443	44	Urian (2013)
Grampus griseus	Southeast U.S. Continental Shelf	27	2	2009	-80.1343	29.976	5	McLellan (2011)
Grampus griseus	Southeast U.S. Continental Shelf	10	6	2009	-80.1174	30.494	32	McLellan (2011)
Grampus griseus	Southeast U.S. Continental Shelf	10	6	2009	-80.0403	30.3762	14	McLellan (2011)
Grampus griseus	Southeast U.S. Continental Shelf	18	8	2009	-76.6107	33.3588	6	McLellan (2011)
Grampus griseus	Southeast U.S. Continental Shelf	9	8	2009	-76.485	33.5757	24	Urian (2013)
Grampus griseus	Southeast U.S. Continental Shelf	16	8	2009	-76.5401	33.4122	36	Urian (2013)
Grampus griseus	Southeast U.S. Continental Shelf	16	8	2009	-76.5774	33.4371	16	Urian (2013)
Grampus griseus	Southeast U.S. Continental Shelf	17	9	2009	-80.0126	30.5069	35	Johnston and Swaim (2013)
Grampus griseus	Southeast U.S. Continental Shelf	15	9	2009	-80.068	30.5718	36	McLellan (2012)
Grampus griseus	Southeast U.S. Continental Shelf	16	9	2009	-79.7874	30.3038	4	McLellan (2012)
Grampus griseus	Southeast U.S. Continental Shelf	18	9	2009	-80.1839	30.0261	5	McLellan (2012)
Grampus griseus	Southeast U.S. Continental Shelf	30	9	2009	-80.0103	30.4431	28	McLellan (2012)
Grampus griseus	Southeast U.S. Continental Shelf	1	10	2009	-80.0927	30.2377	4	McLellan (2012)
Grampus griseus	Southeast U.S. Continental Shelf	18	11	2009	-79.897	30.4295	40	McLellan (2012)
Grampus griseus	Southeast U.S. Continental Shelf	20	11	2009	-80.1798	30.0319	20	McLellan (2012)
Grampus griseus	Southeast U.S. Continental Shelf	15	1	2010	-76.1952	33.6641	5	McLellan (2011)
Grampus griseus	Southeast U.S. Continental Shelf	21	2	2010	-80.154	30.1688	7	McLellan (2011)
Grampus griseus	Southeast U.S. Continental Shelf	20	3	2010	-79.9118	30.3614	6	McLellan (2011)
Grampus griseus	Southeast U.S. Continental Shelf	24	3	2010	-80.1133	30.3025	9	McLellan (2011)
Grampus griseus	Southeast U.S. Continental Shelf	24	3	2010	-80.0375	30.4291	2	McLellan (2011)
Grampus griseus	Southeast U.S. Continental Shelf	1	4	2010	-80.1879	30.1029	11	McLellan (2011)
Grampus griseus	Southeast U.S. Continental Shelf	16	6	2010	-79.9103	30.5873	8	Johnston and Swaim (2013)
Grampus griseus	Southeast U.S. Continental Shelf	28	7	2010	-79.0402	32.0623	35	Josephson and Garrison (2013)
Grampus griseus	Southeast U.S. Continental Shelf	4	8	2010	-80.0221	30.5033	14	McLellan (2011)
Grampus griseus	Southeast U.S. Continental Shelf	4	8	2010	-79.9273	30.0299	14	McLellan (2011)
Grampus griseus	Southeast U.S. Continental Shelf	5	8	2010	-80.0082	30.4389	41	McLellan (2011)
Grampus griseus	Southeast U.S. Continental Shelf	8	9	2010	-79.7763	30.1511	19	McLellan (2011)
Grampus griseus	Southeast U.S. Continental Shelf	8	9	2010	-80.1041	30.1665	37	McLellan (2011)
Grampus griseus	Southeast U.S. Continental Shelf	9	9	2010	-79.7659	30.2596	27	McLellan (2011)
Grampus griseus	Southeast U.S. Continental Shelf	21	10	2010	-76.1419	33.8139	10	McLellan (2011)
Grampus griseus	Southeast U.S. Continental Shelf	21	10	2010	-76.6259	33.5685	2	McLellan (2011)
Grampus griseus	Southeast U.S. Continental Shelf	31	1	2011	-79.9085	30.5673	NA	McLellan (2011)
Grampus griseus	Southeast U.S. Continental Shelf	31	1	2011	-79.9106	30.5681	8	McLellan (2011)
Grampus griseus	Southeast U.S. Continental Shelf	8	4	2011	-80.1309	30.1674	8	McLellan (2012)
Grampus griseus	Southeast U.S. Continental Shelf	20	5	2011	-80.0912	29.9731	4	McLellan (2012)
Grampus griseus	Southeast U.S. Continental Shelf	20	5	2011	-80.0991	30.4399	5	McLellan (2012)
Grampus griseus	Southeast U.S. Continental Shelf	20	7	2011	-80.1051	30.3666	23	McLellan (2012)
Grampus griseus	Southeast U.S. Continental Shelf	20	7	2011	-80.1641	30.3719	28	McLellan (2012)
Grampus griseus	Southeast U.S. Continental Shelf	21	7	2011	-80.1346	30.3612	20	McLellan (2012)
Grampus griseus	Southeast U.S. Continental Shelf	17	8	2011	-79.8504	30.5032	4	McLellan (2012)
Grampus griseus	Southeast U.S. Continental Shelf	29	9	2011	-80.0933	30.5607	45	McLellan (2012)
Grampus griseus	Southeast U.S. Continental Shelf	17	10	2011	-80.1647	30.3659	11	McLellan (2012)
Grampus griseus	Southeast U.S. Continental Shelf	17	10	2011	-80.1184	30.3627	10	McLellan (2012)
Grampus griseus	Southeast U.S. Continental Shelf	17	10	2011	-80.0149	30.4977	10	McLellan (2012)
Grampus griseus	Southeast U.S. Continental Shelf	25	1	2012	-79.8331	30.3697	5	McLellan (2012)
Grampus griseus	Southeast U.S. Continental Shelf	3	5	2012	-75.0877	35.1042	13	McLellan (2014)
Grampus griseus	Southeast U.S. Continental Shelf	16	5	2012	-79.9221	28.4964	9	Josephson and Garrison (2013)
Grampus griseus	Southeast U.S. Continental Shelf	6	7	2012	-80.0802	30.0292	18	McLellan (2014)
Grampus griseus	Southeast U.S. Continental Shelf	6	7	2012	-79.9984	30.5045	17	McLellan (2014)
Grampus griseus	Southeast U.S. Continental Shelf	22	7	2012	-79.9038	30.4244	14	McLellan (2014)
Grampus griseus	Southeast U.S. Continental Shelf	6	9	2012	-79.9541	30.5572	NA	Ampela and Miller-Francisco (2016)
Grampus griseus	Southeast U.S. Continental Shelf	22	9	2012	-79.991	30.3686	13	McLellan (2014)
Grampus griseus	Southeast U.S. Continental Shelf	28	9	2012	-79.942	30.713	4	Spontak (2013)
Grampus griseus	Southeast U.S. Continental Shelf	24	10	2012	-75.8435	34.4333	60	Swaim (2016)
Grampus griseus	Southeast U.S. Continental Shelf	4	11	2012	-79.9372	30.4338	8	McLellan (2014)
Grampus griseus	Southeast U.S. Continental Shelf	9	5	2013	-79.8194	30.1742	18	McLellan (2014)
Grampus griseus	Southeast U.S. Continental Shelf	10	5	2013	-80.0205	30.5682	19	McLellan (2014)
Grampus griseus	Southeast U.S. Continental Shelf	10	5	2013	-80.0905	30.3736	6	McLellan (2014)
Grampus griseus	Southeast U.S. Continental Shelf	10	5	2013	-80.1533	30.1257	10	Swaim (2016)
Grampus griseus	Southeast U.S. Continental Shelf	21	6	2013	-79.9205	29.9764	10	McLellan (2014)
Grampus griseus	Southeast U.S. Continental Shelf	5	9	2013	-80.035	30.5739	11	McLellan (2014)
Grampus griseus	Southeast U.S. Continental Shelf	17	10	2013	-80.1809	30.106	7	McLellan (2014)
Grampus griseus	Southeast U.S. Continental Shelf	8	5	2014	-79.9656	30.0338	10	McLellan (2015)
Grampus griseus	Southeast U.S. Continental Shelf	10	7	2014	-80.0279	30.1007	3	McLellan (2015)
Grampus griseus	Southeast U.S. Continental Shelf	11	9	2014	-80.0461	30.2331	27	McLellan (2015)
Grampus griseus	Southeast U.S. Continental Shelf	12	9	2014	-79.9789	30.5015	12	McLellan (2015)
Grampus griseus	Southeast U.S. Continental Shelf	21	10	2014	-80.2122	30.0866	28	McLellan (2015)
Grampus griseus	Southeast U.S. Continental Shelf	27	10	2014	-80.1306	30.2724	50	Swaim (2016)
Grampus griseus	Southeast U.S. Continental Shelf	20	8	2015	-79.3251	30.539	6	McLellan (2016)
Grampus griseus	Southeast U.S. Continental Shelf	16	12	2015	-80.1506	30.4036	40	Swaim (2016)
Grampus griseus	Southeast U.S. Continental Shelf	25	5	2016	-80.0953	30.5726	8	McLellan (2017)
Grampus griseus	Southeast U.S. Continental Shelf	12	7	2017	-80.1735	29.9643	19	McLellan (2018)
Grampus griseus	Caribbean Sea	12	12	1967	-81.1666	23.6666	20	Whitt et al. (2011)
Grampus griseus	Caribbean Sea	31	10	1971	-82.4435	23.1511	1	Whitt et al. (2011)
Grampus griseus	Caribbean Sea	31	10	1971	-82.233	23.2126	1	Whitt et al. (2011)
Grampus griseus	Caribbean Sea	10	5	1997	-77.2812	25.8325	7	Dunn (2013)
Grampus griseus	Caribbean Sea	NA	8	1998	-64.6333	11.8166	1	Romero et al. (2001)
Grampus griseus	Caribbean Sea	24	3	2000	-61.3543	14.4287	3	Garrison (2013)
Grampus griseus	Caribbean Sea	26	3	2001	-76.7798	24.6564	12	Dunn (2013)
Grampus griseus	Caribbean Sea	11	1	2002	-77.3814	25.8951	20	Dunn (2013)
Grampus griseus	Caribbean Sea	NA	5	2004	-61.1	16.25	1	Yoshida et al. (2010)
Grampus griseus	Caribbean Sea	19	2	2011	-77.3525	25.8747	12	Dunn (2013)
Grampus griseus	Caribbean Sea	14	10	2017	-67.789	17.5606	NA	van Canneyt (2018)
Grampus griseus	Caribbean Sea	14	10	2017	-63.7223	16.8534	NA	van Canneyt (2018)

[truncated: 6 more sheets: Atlantic spotted dolphin, Pantropical spotted dolphin, Striped dolphin, Spinner dolphin, Clymene dolphin, Bottlenose dolphin]
